# Supplementary material for: Mammalian skull heterochrony reveals modular evolution and a link between cranial development and brain size
Source: PubMed Central journal article supplement — Nat Commun. 2014 Apr 4;5:3625. doi: 10.1038/ncomms4625 (PMC3988809; doi:10.1038/ncomms4625), 2014-04-04
Supplement: ncomms4625-s1.pdf [file ncomms4625-s1.pdf]

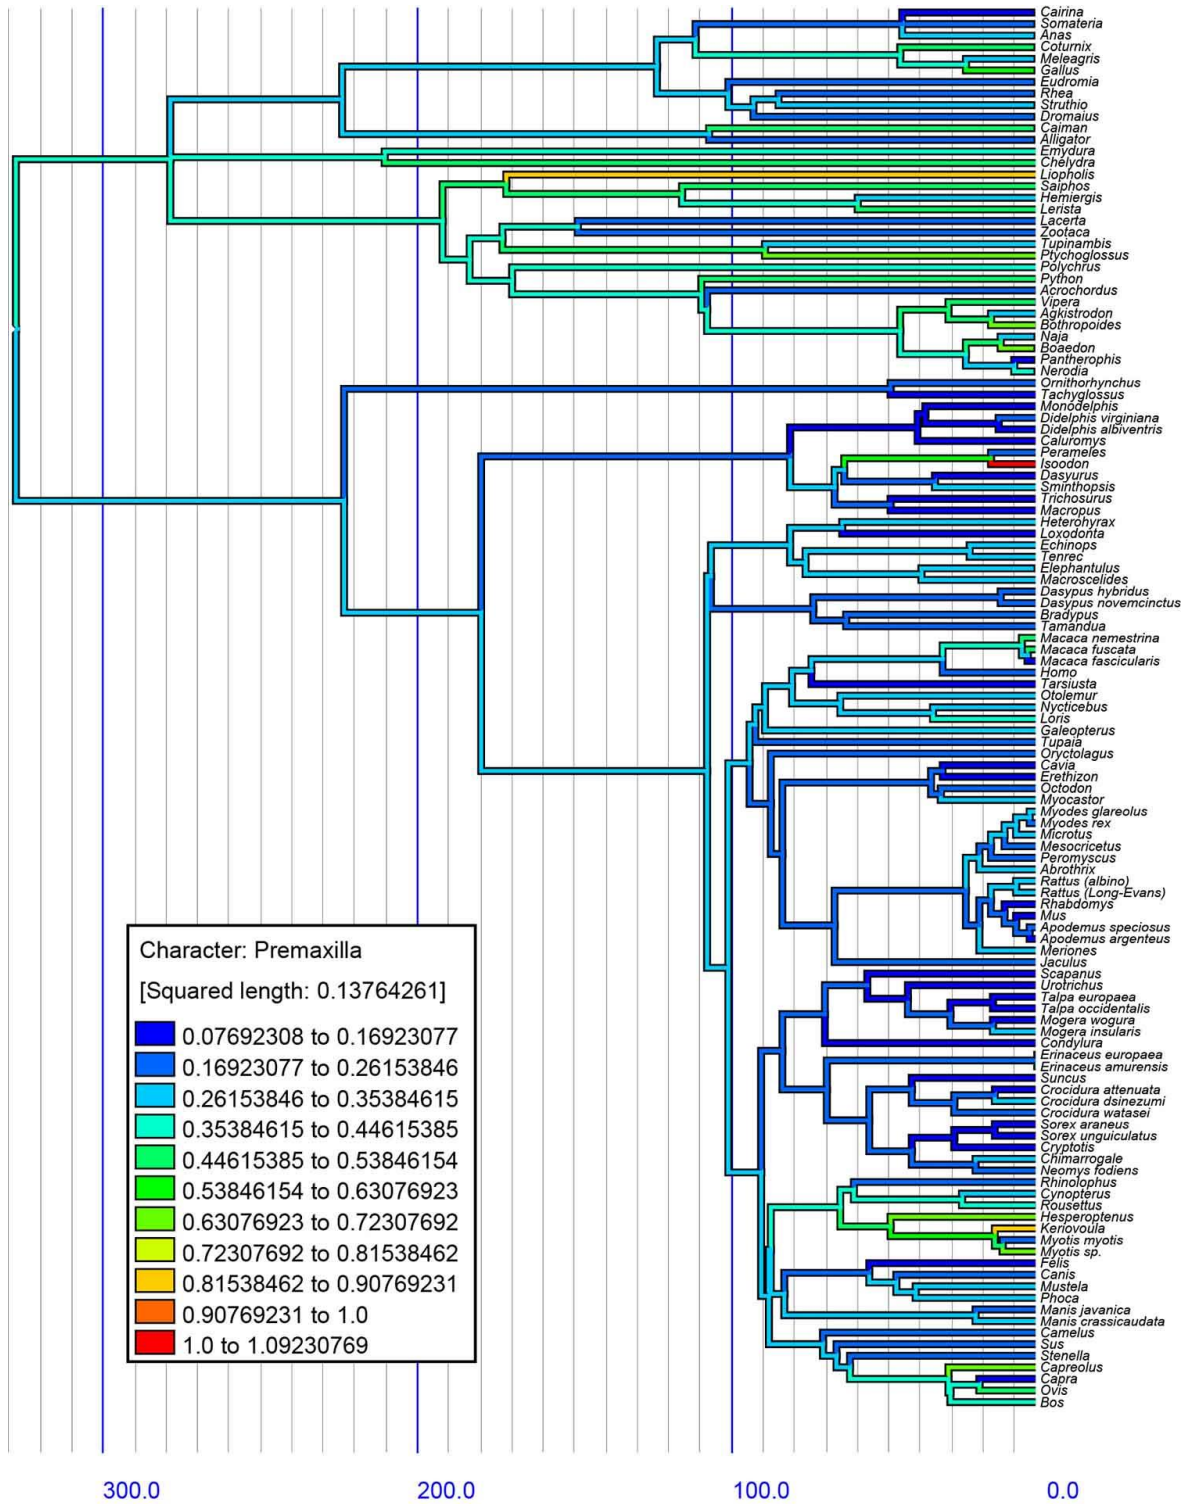

Supplementary Fig. 1. Reconstructed heterochrony of relative timing of the premaxilla, using squared-change parsimony. Blue numbers indicate divergence time (in MYA).

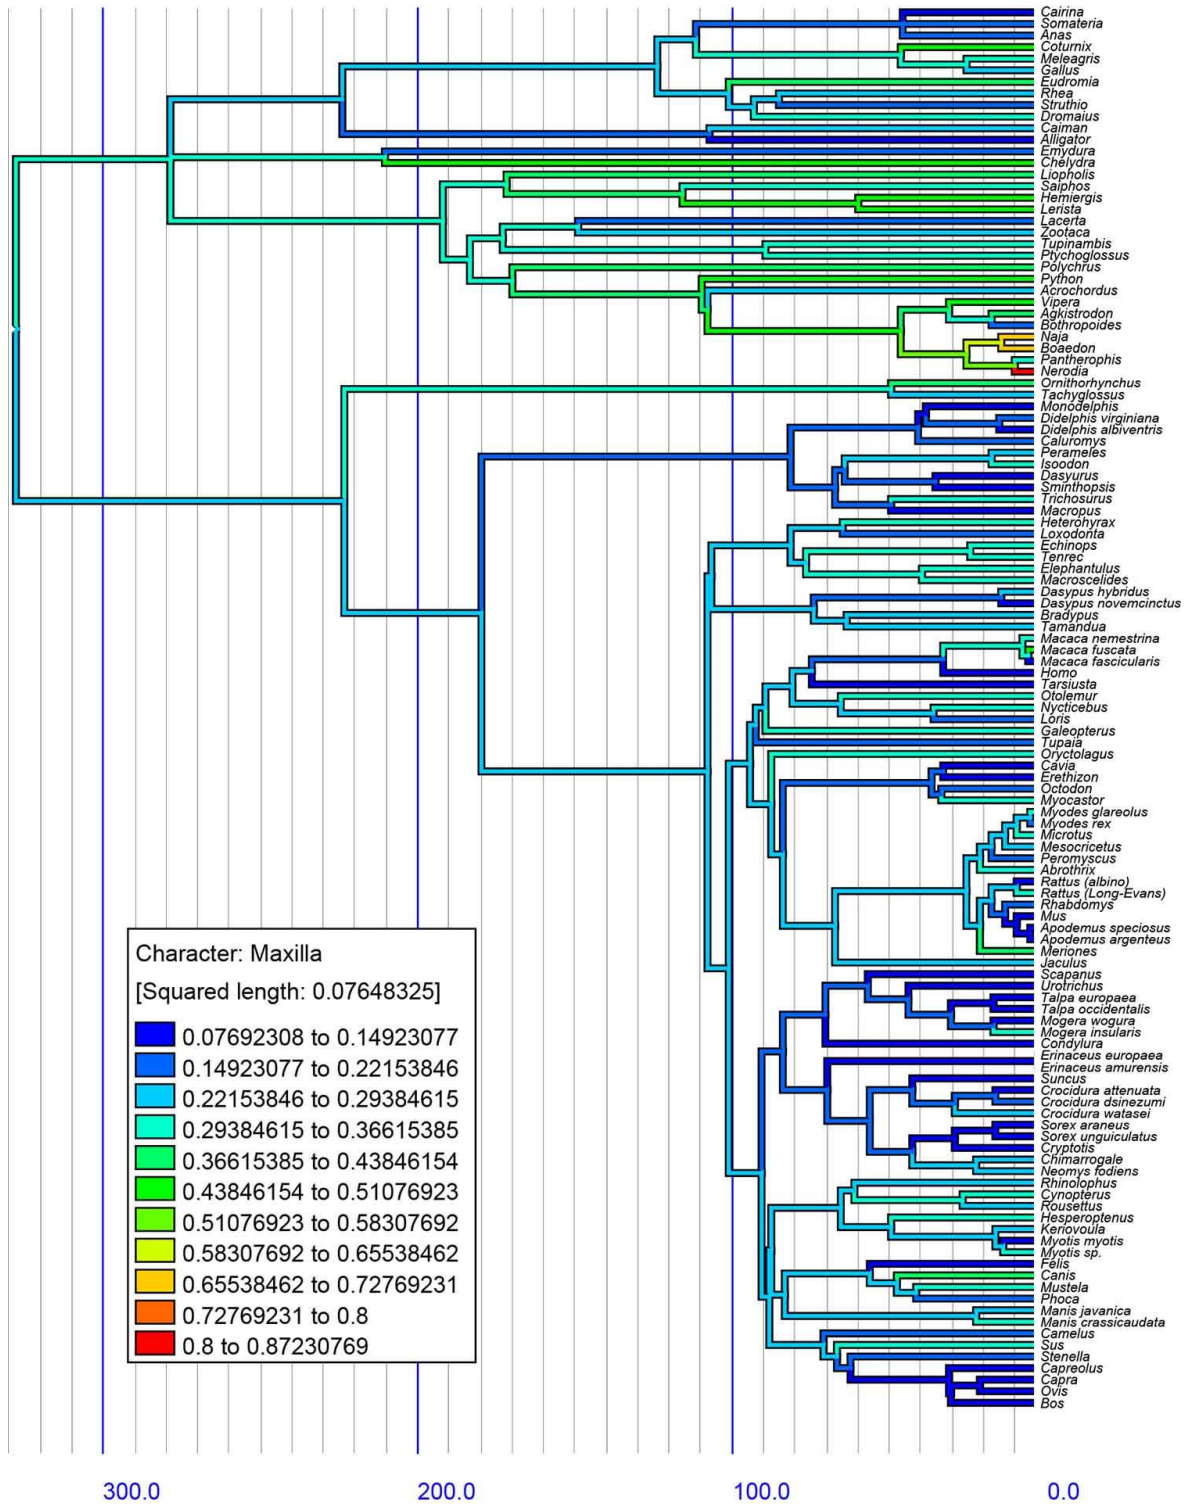

Supplementary Fig. 2. Reconstructed heterochrony of relative timing of the maxilla, using squared-change parsimony.

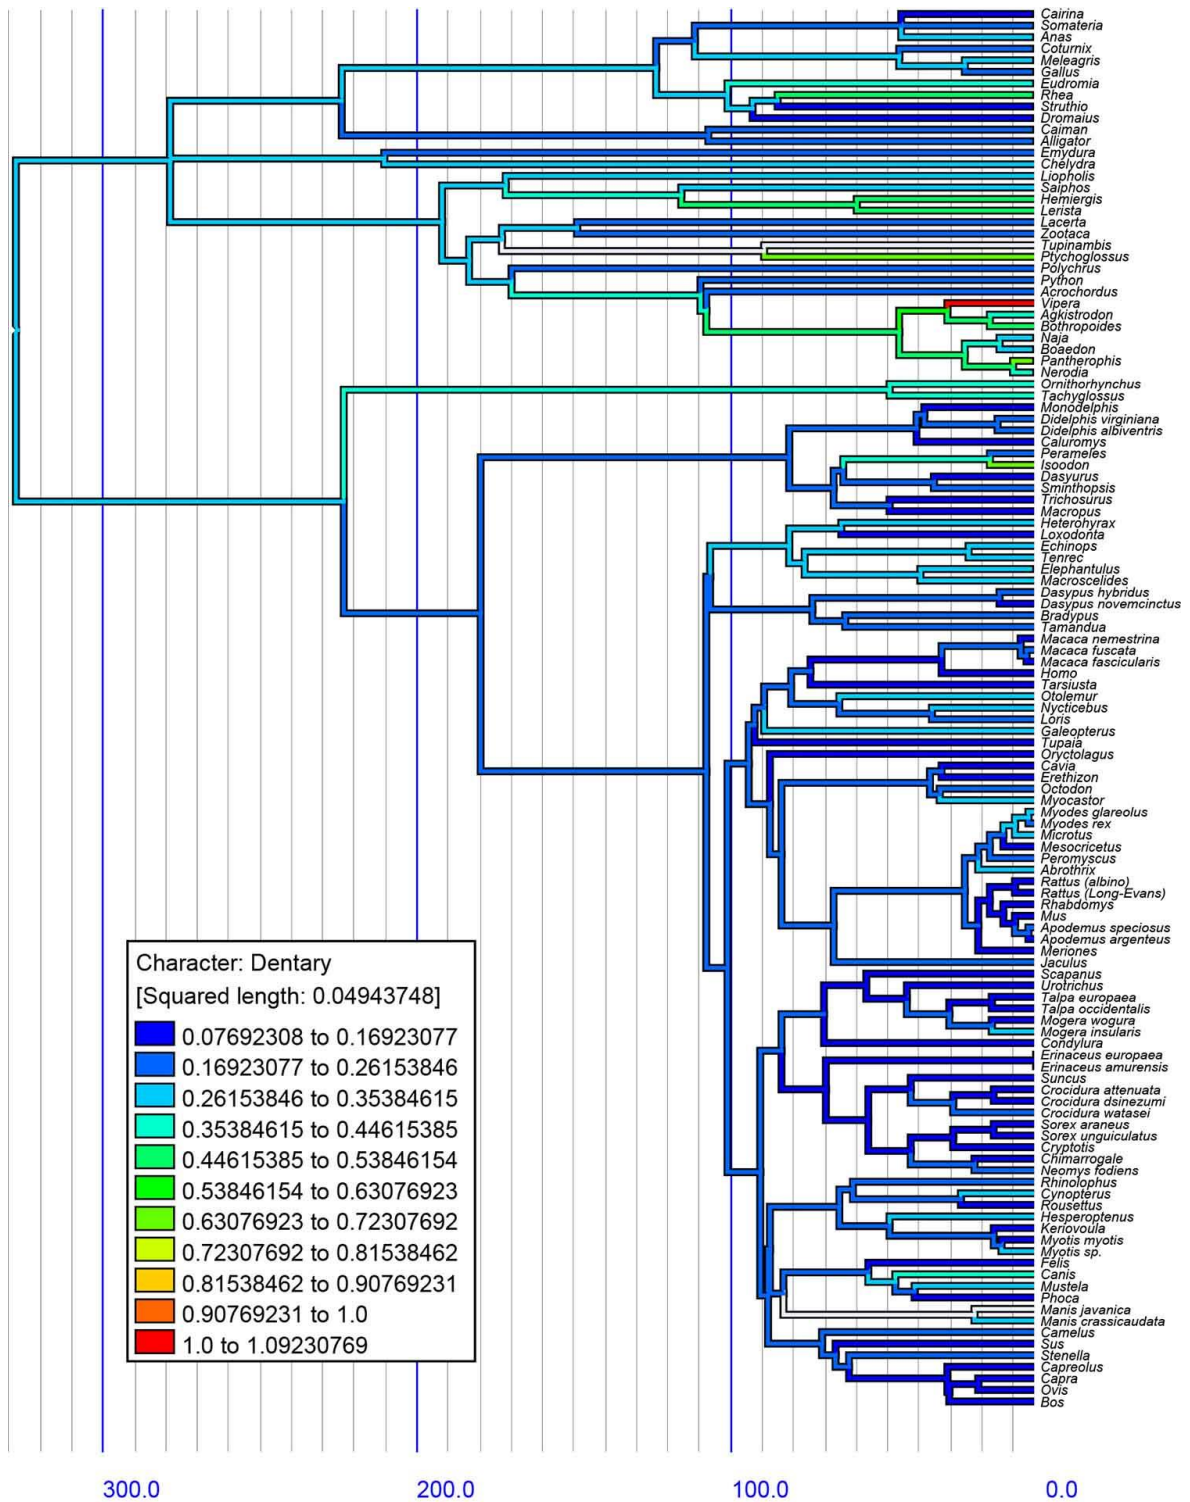

Supplementary Fig. 3. Reconstructed heterochrony of relative timing of the dentary, using squared-change parsimony.

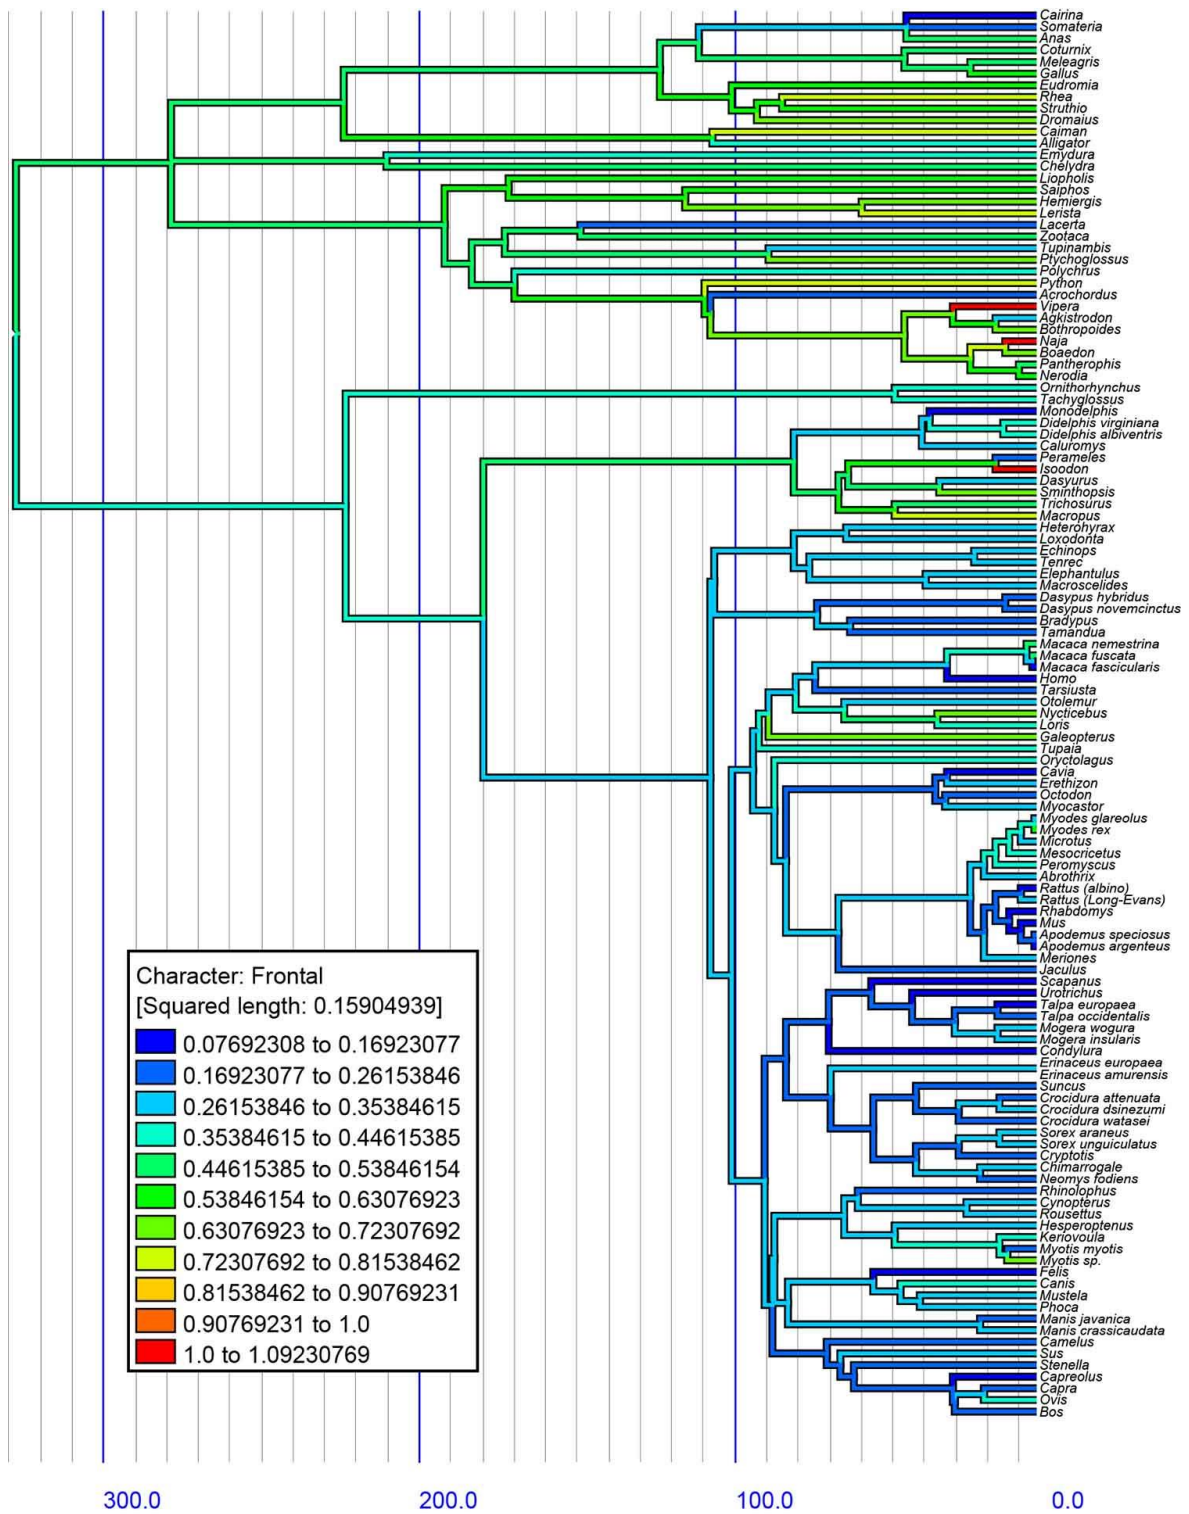

Supplementary Fig. 4. Reconstructed heterochrony of relative timing of the frontal, using squared-change parsimony.



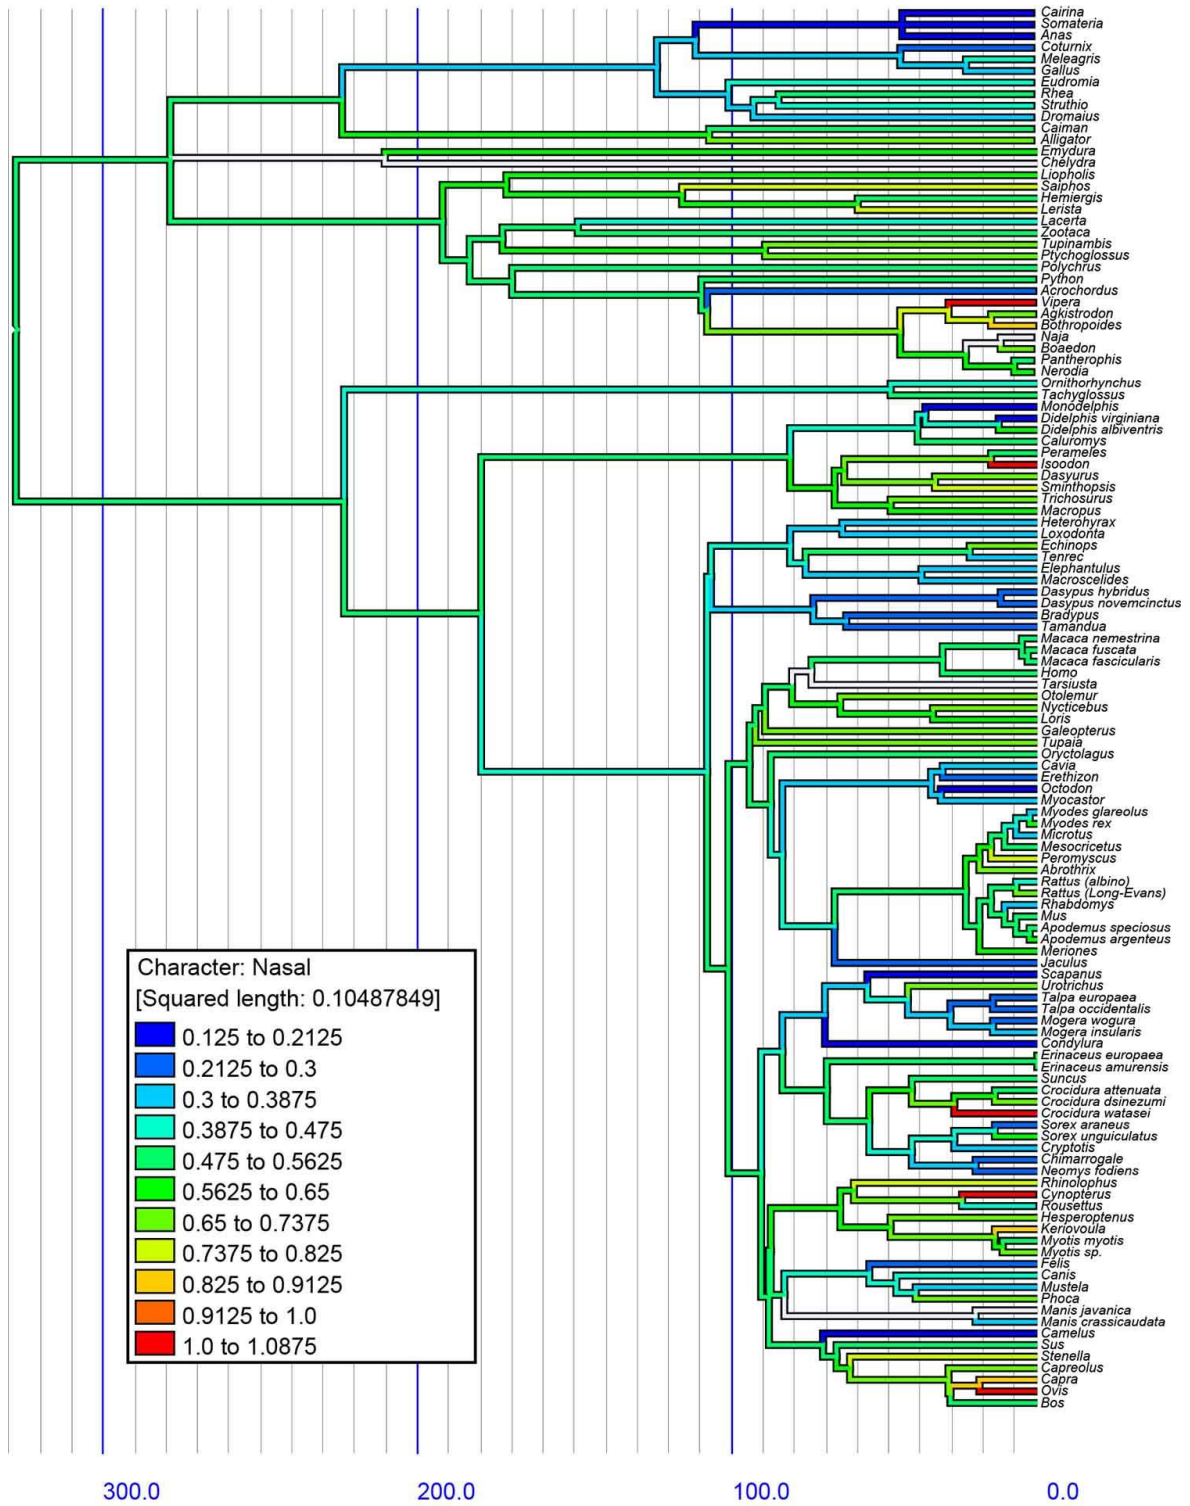

**Supplementary Fig. 5. Reconstructed heterochrony of relative timing of the nasal, using squared-change parsimony.**

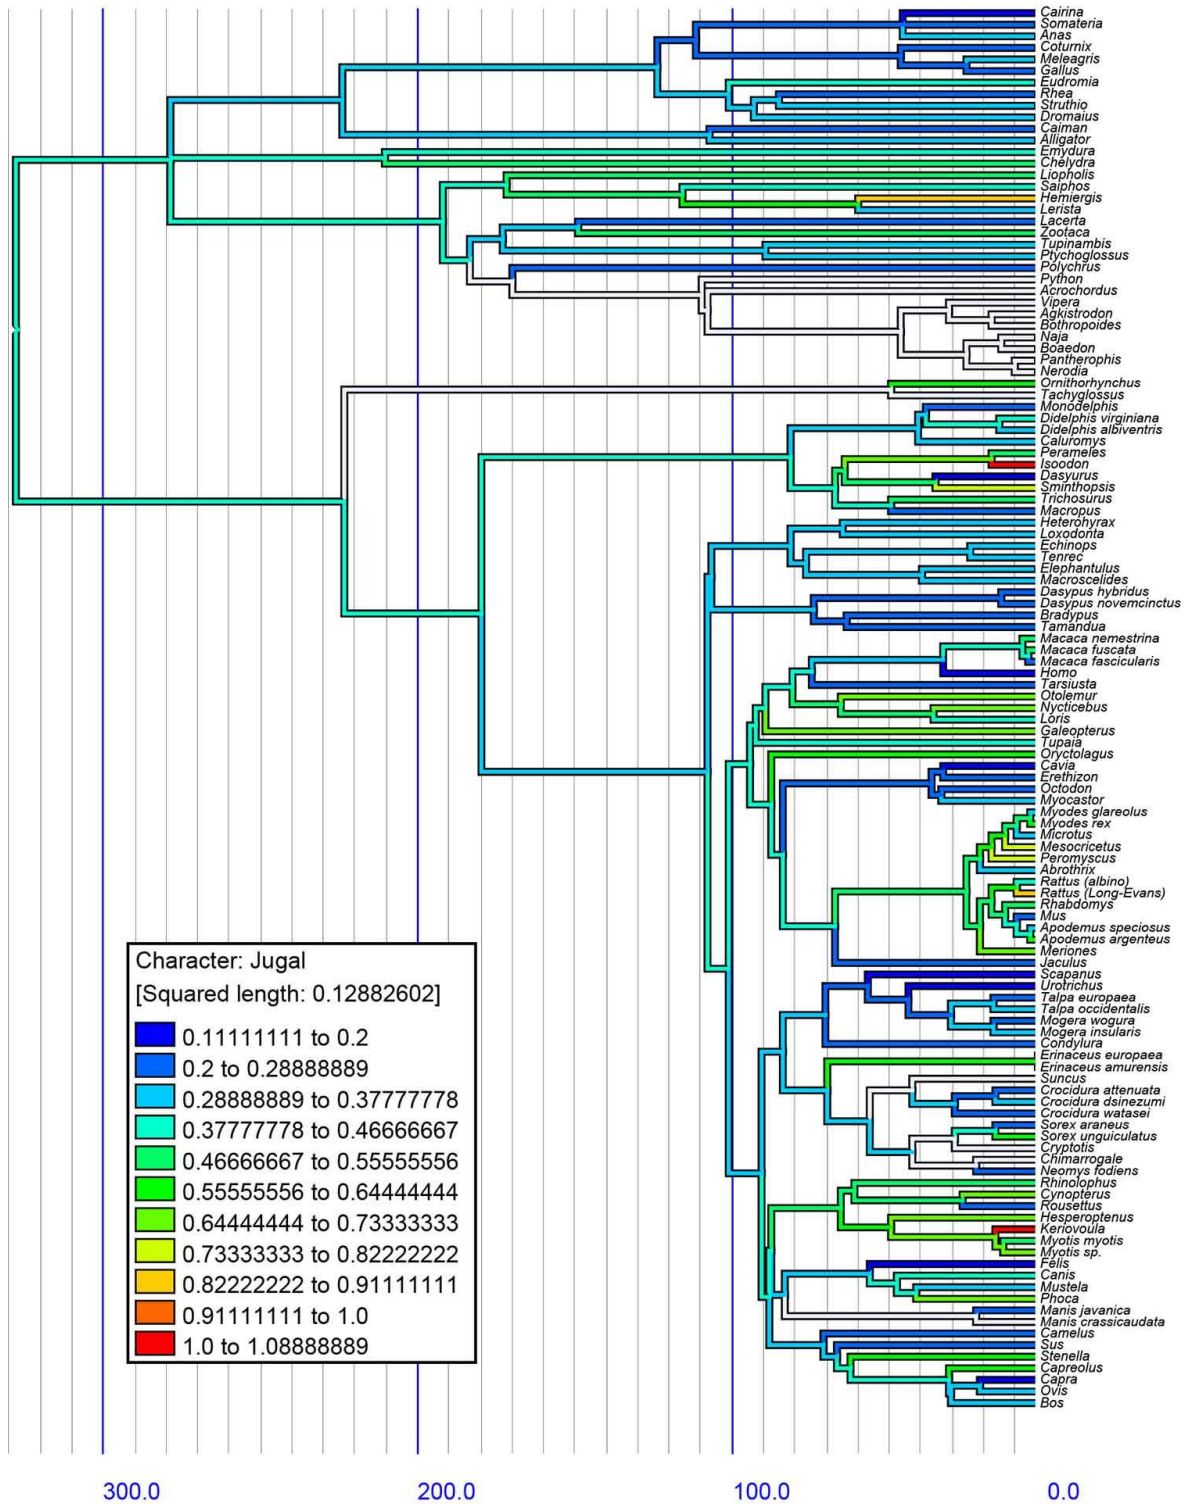

Supplementary Fig. 6. Reconstructed heterochrony of relative timing of the jugal, using squared-change parsimony.

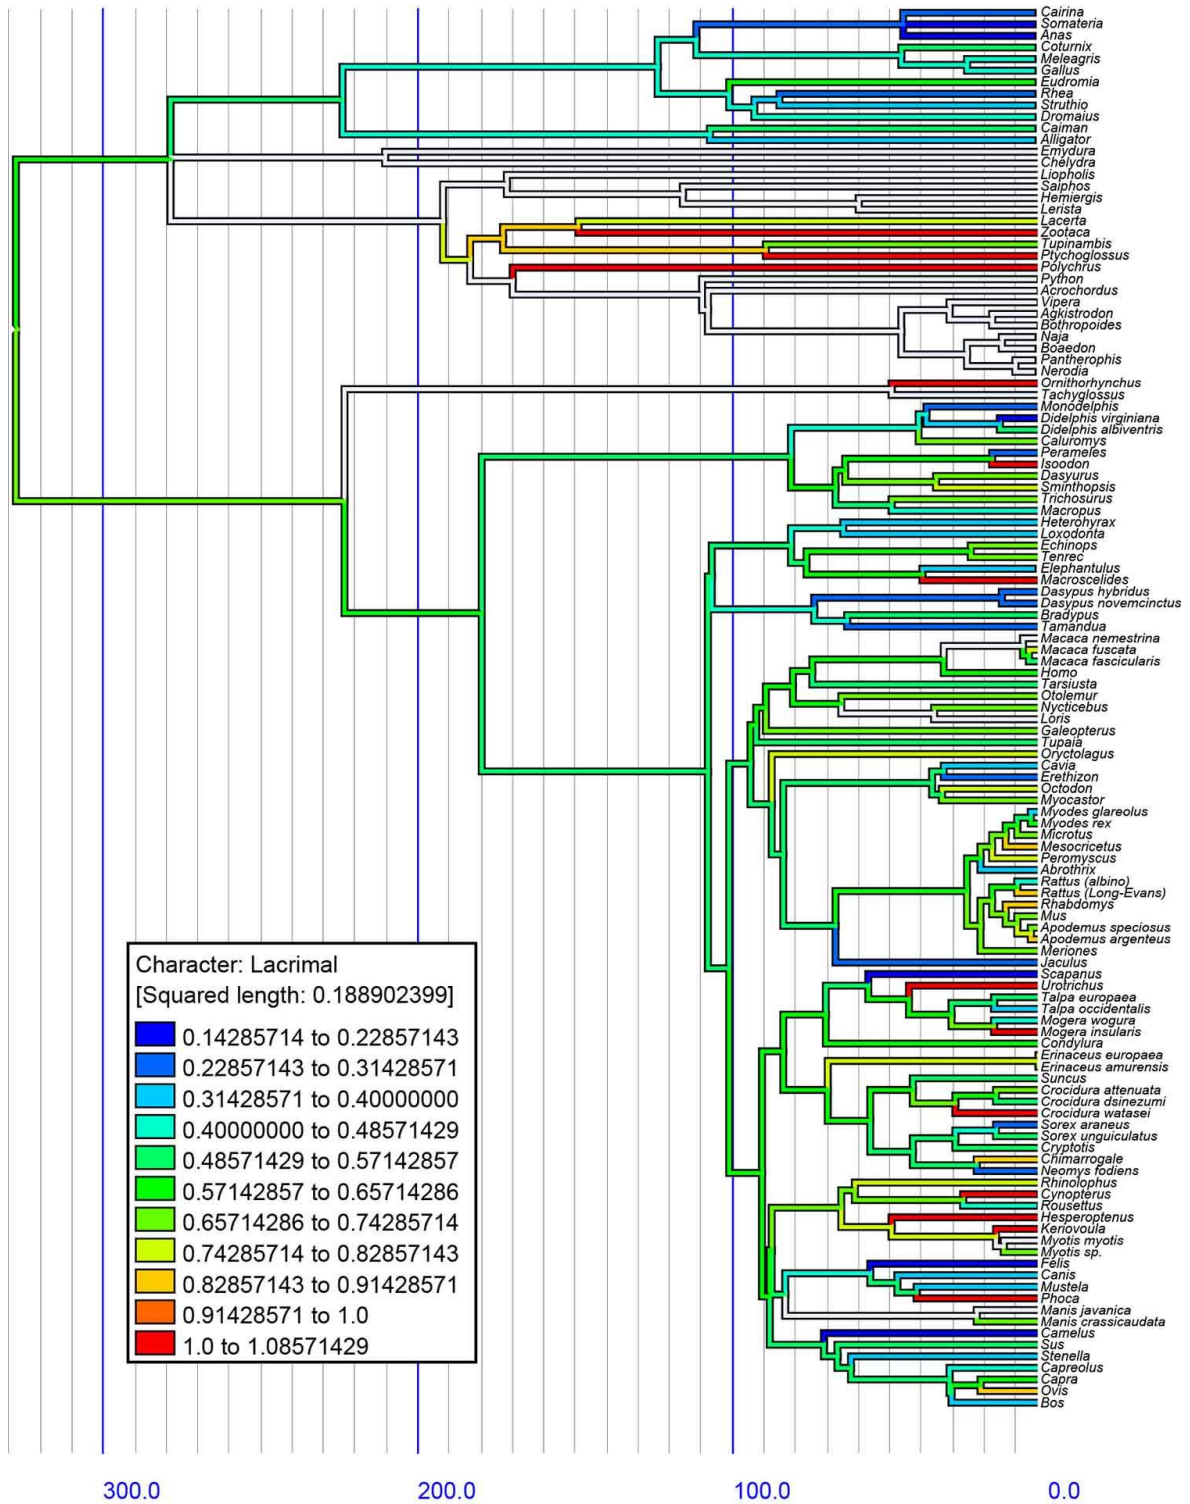

Supplementary Fig. 7. Reconstructed heterochrony of relative timing of the lacrimal, using squared-change parsimony.

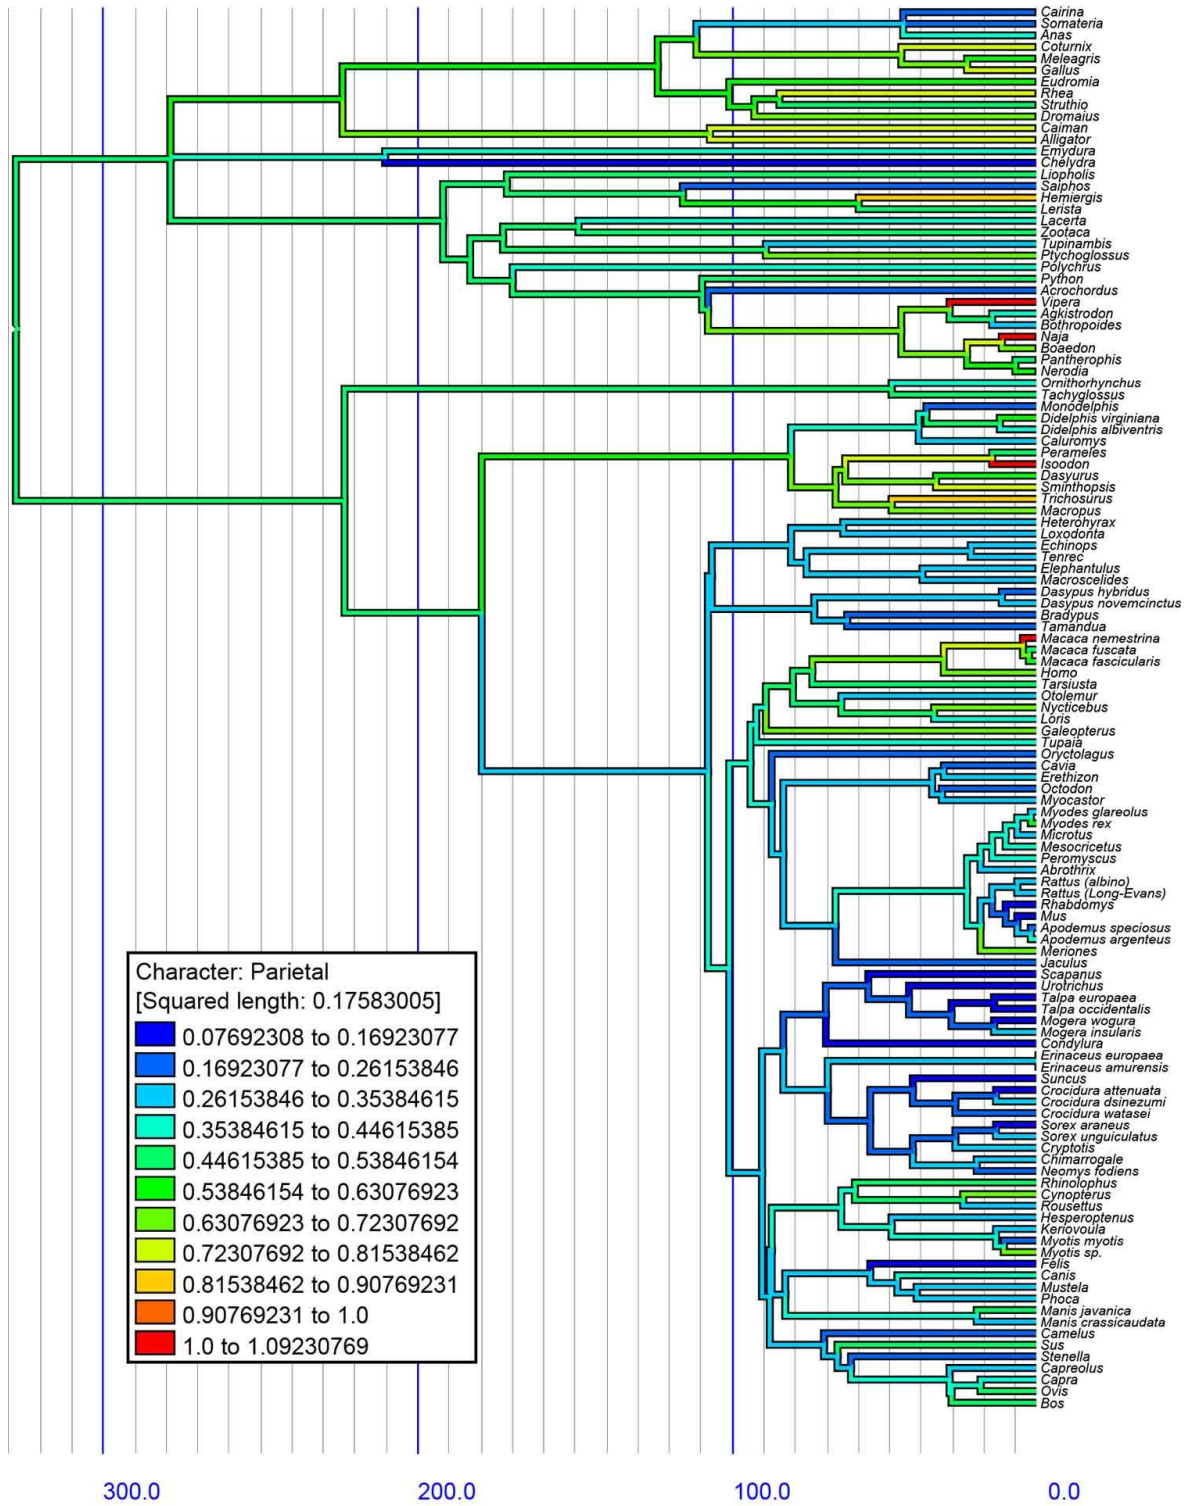

Supplementary Fig. 8. Reconstructed heterochrony of relative timing of the parietal, using squared-change parsimony.



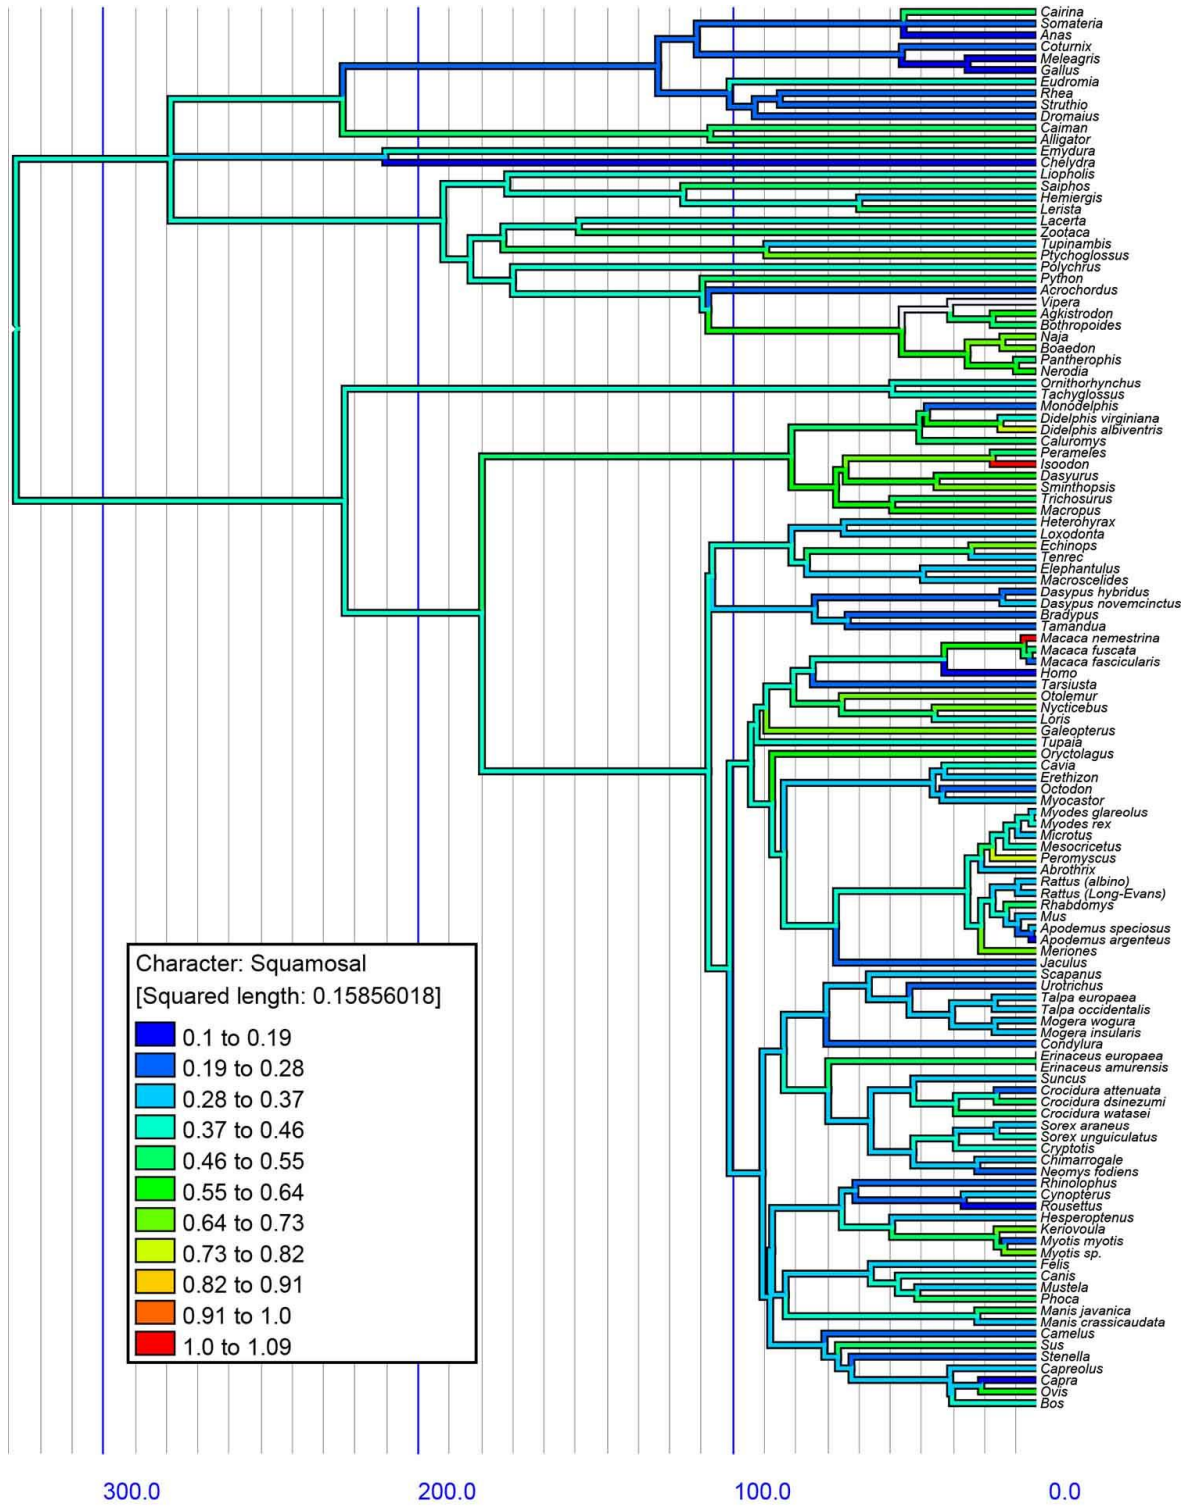

Supplementary Fig. 9. Reconstructed heterochrony of relative timing of the squamosal, using squared-change parsimony.

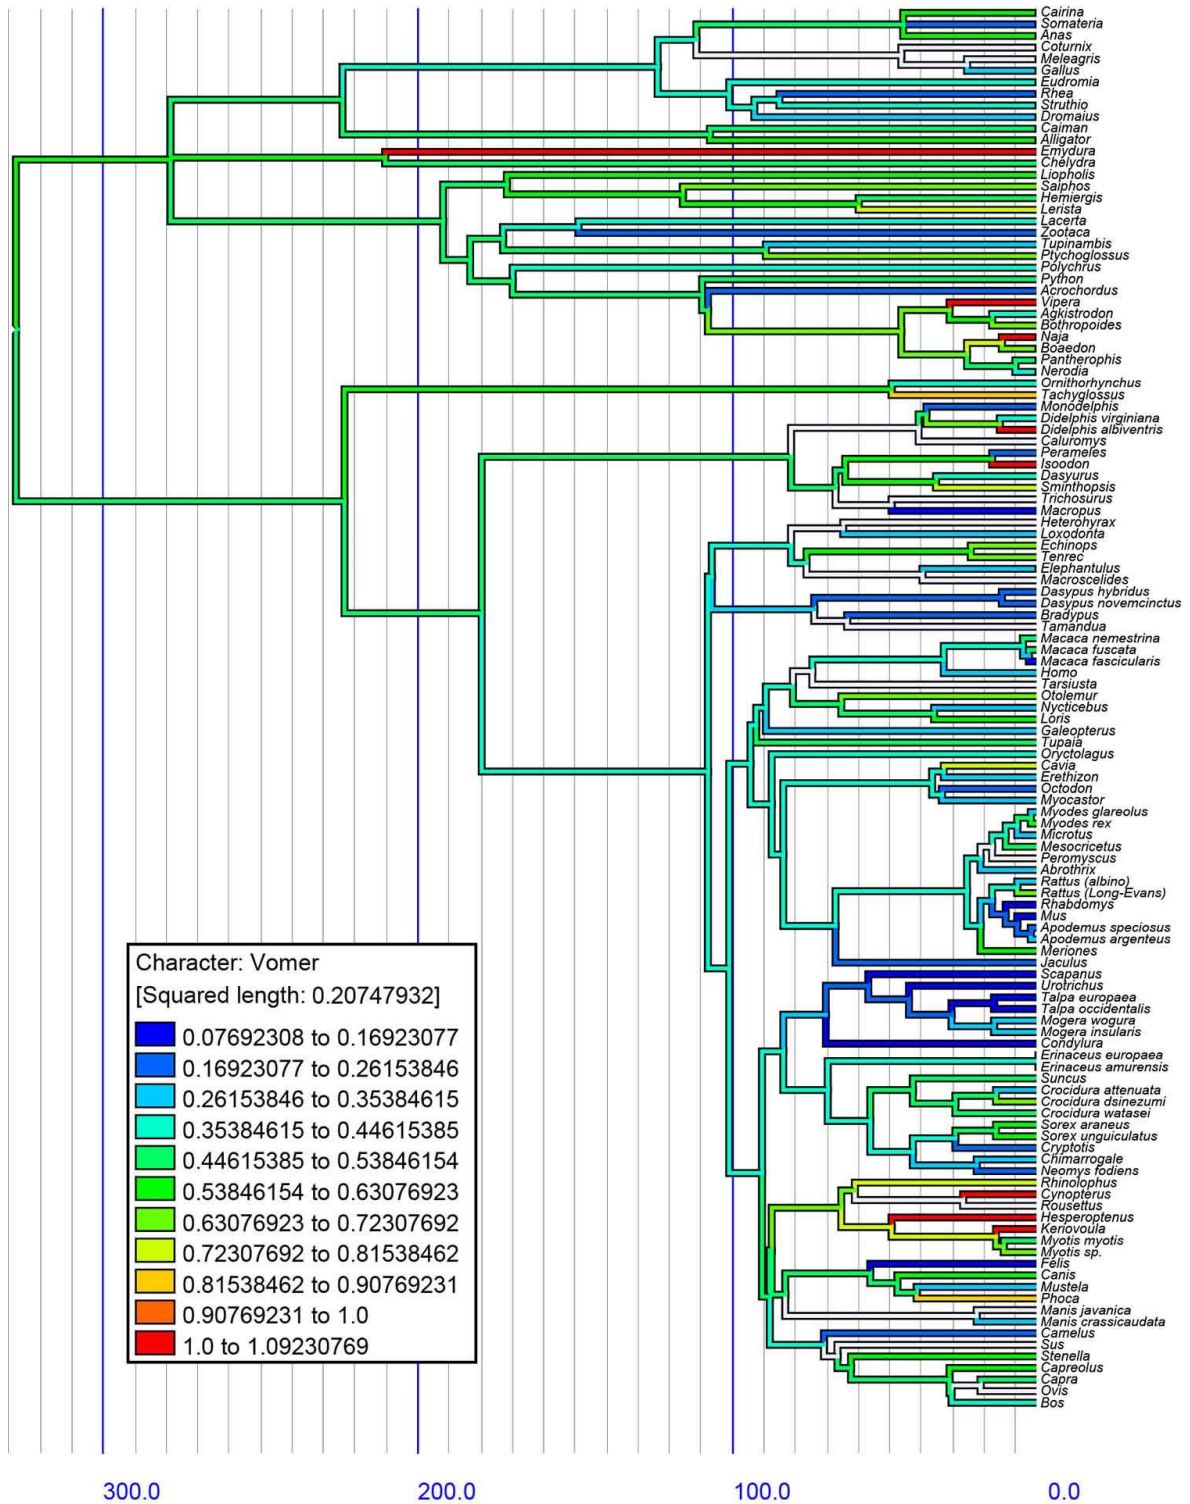

Supplementary Fig. 10. Reconstructed heterochrony of relative timing of the vomer, using squared-change parsimony.

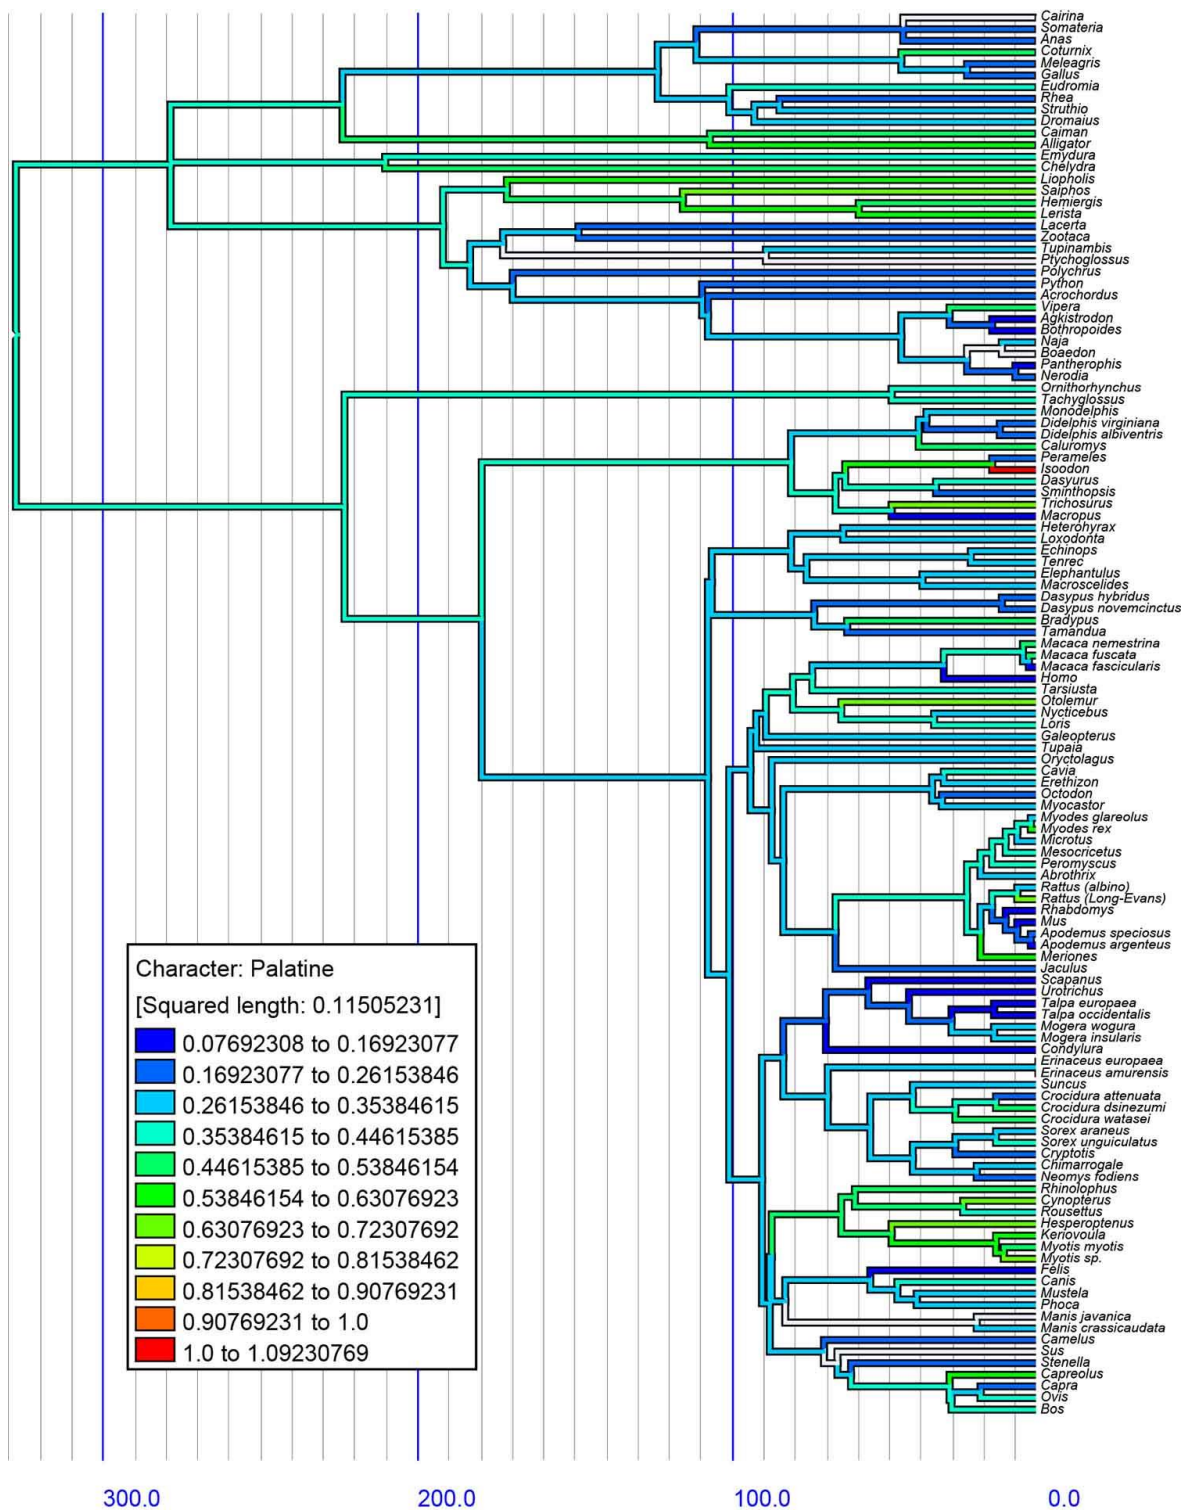

Supplementary Fig. 11. Reconstructed heterochrony of relative timing of the palatine, using squared-change parsimony.

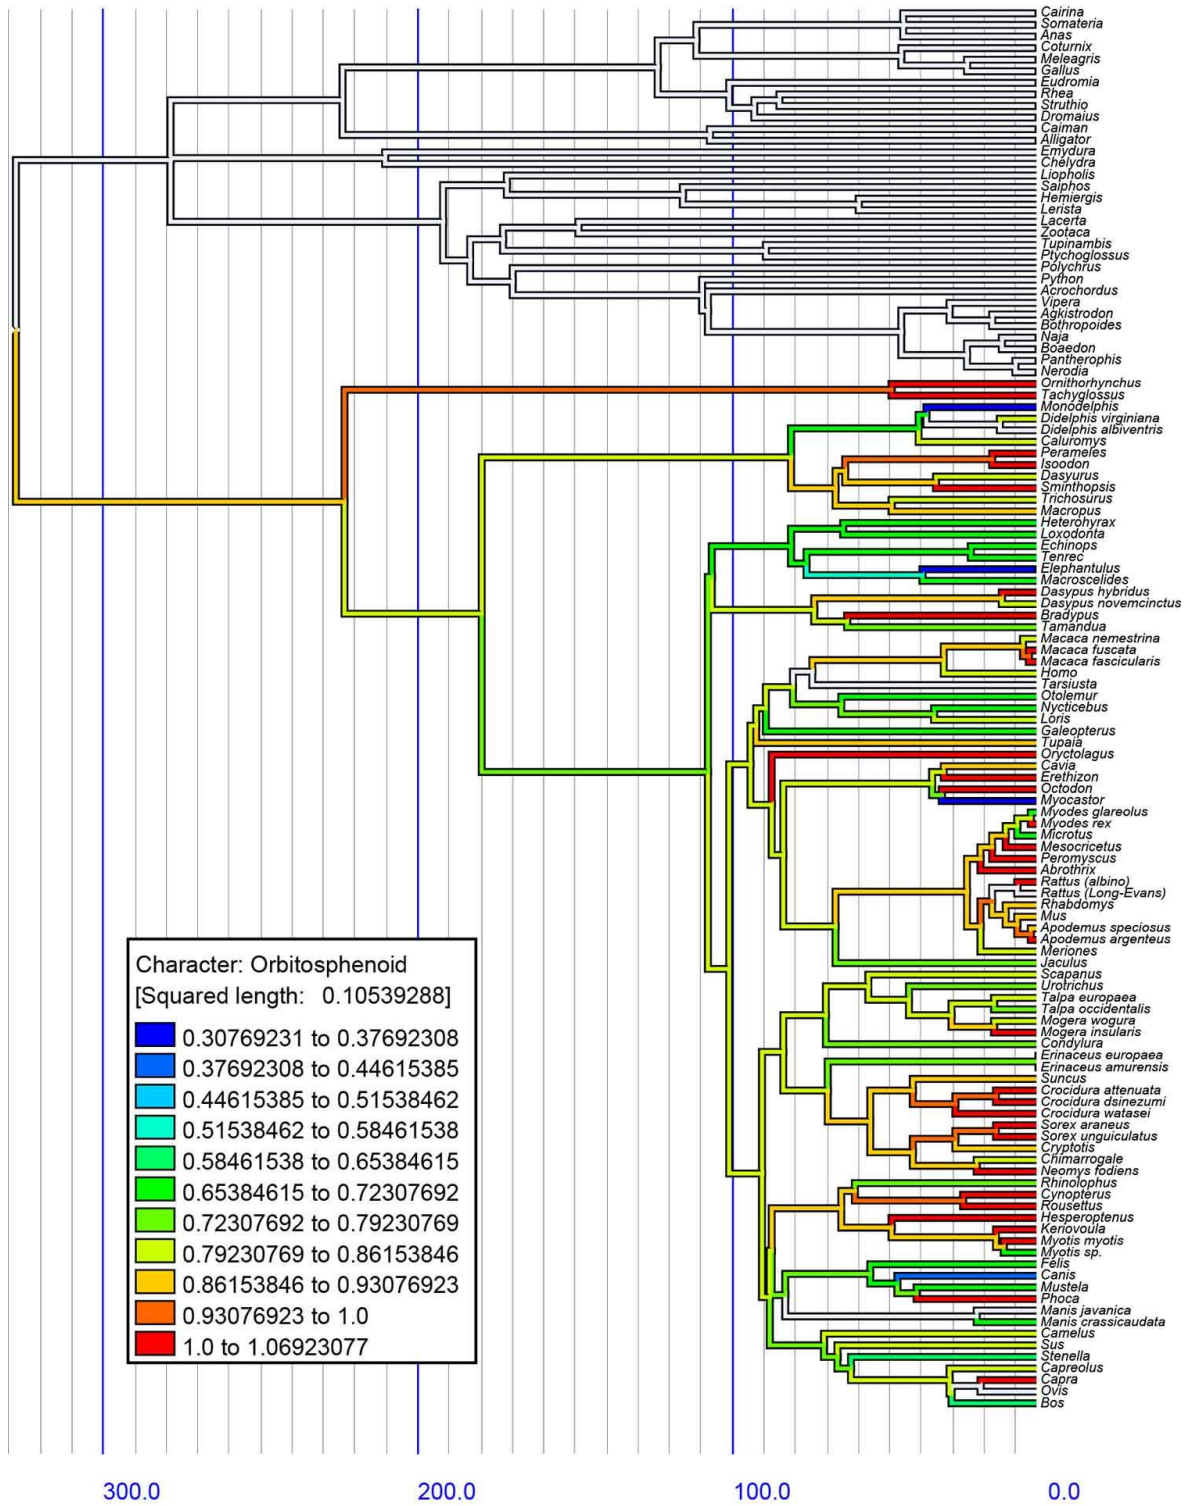

Supplementary Fig. 12. Reconstructed heterochrony of relative timing of the orbitosphenoid, using squared-change parsimony.



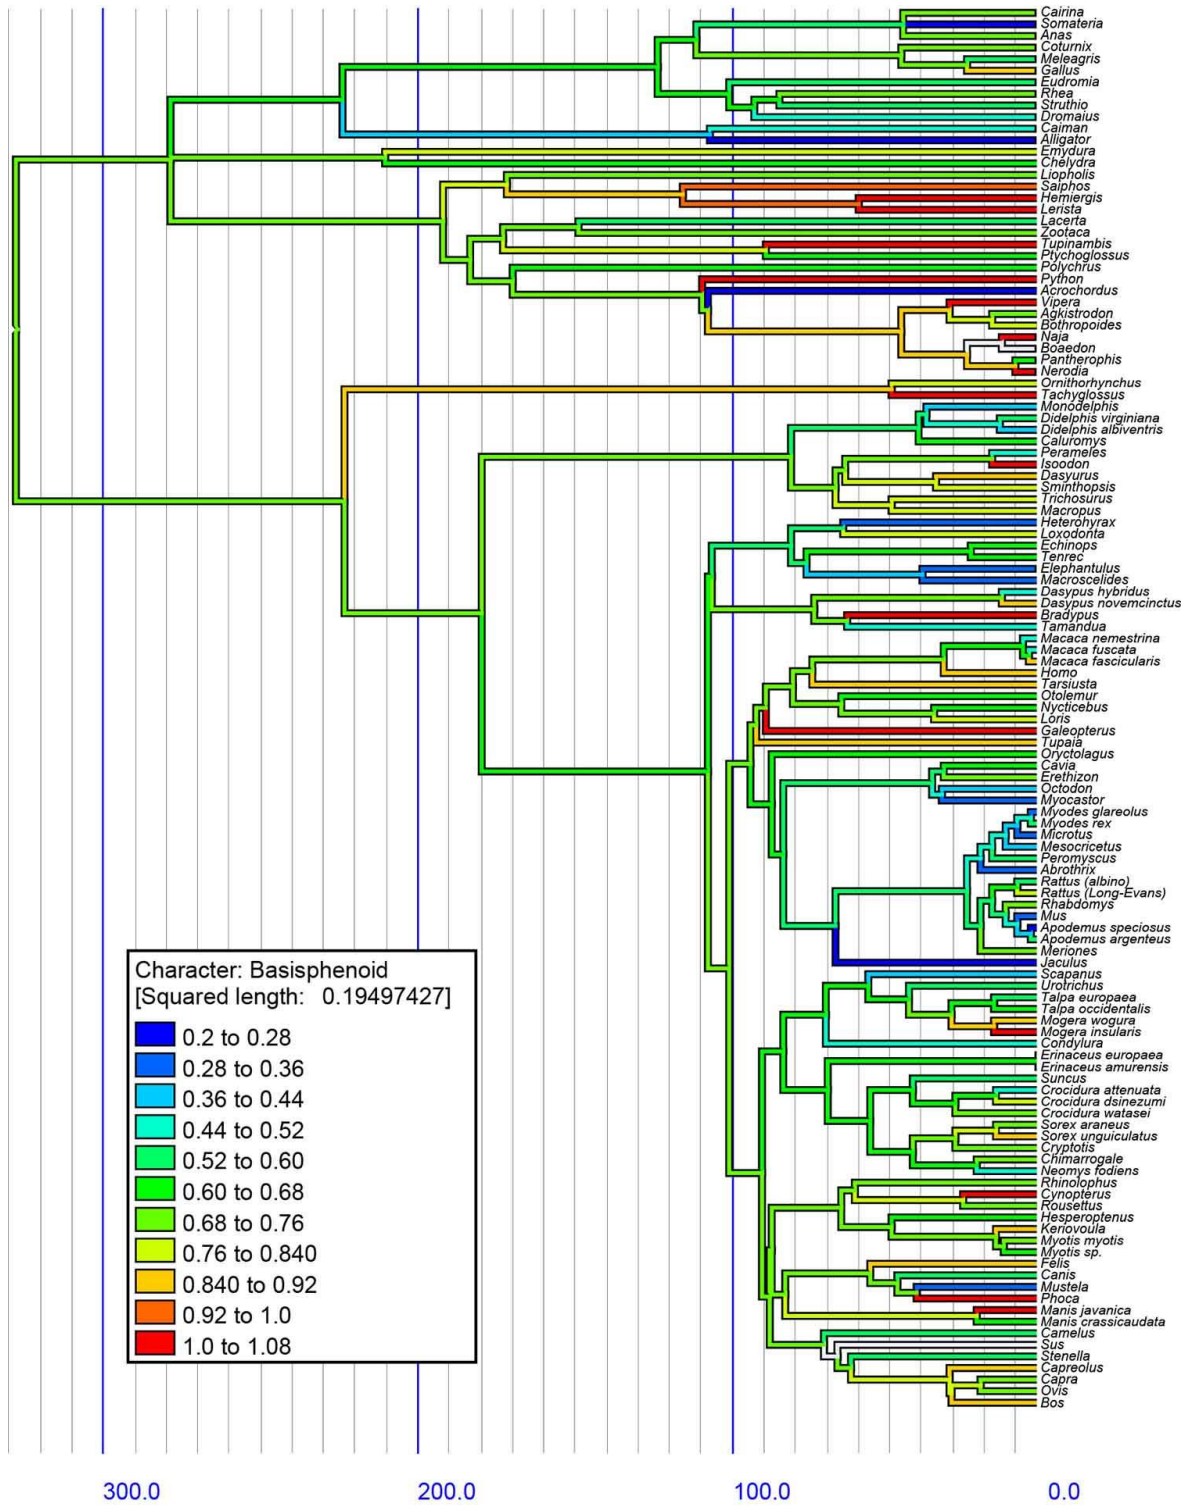

Supplementary Fig. 13. Reconstructed heterochrony of relative timing of the basisphenoid, using squared-change parsimony.

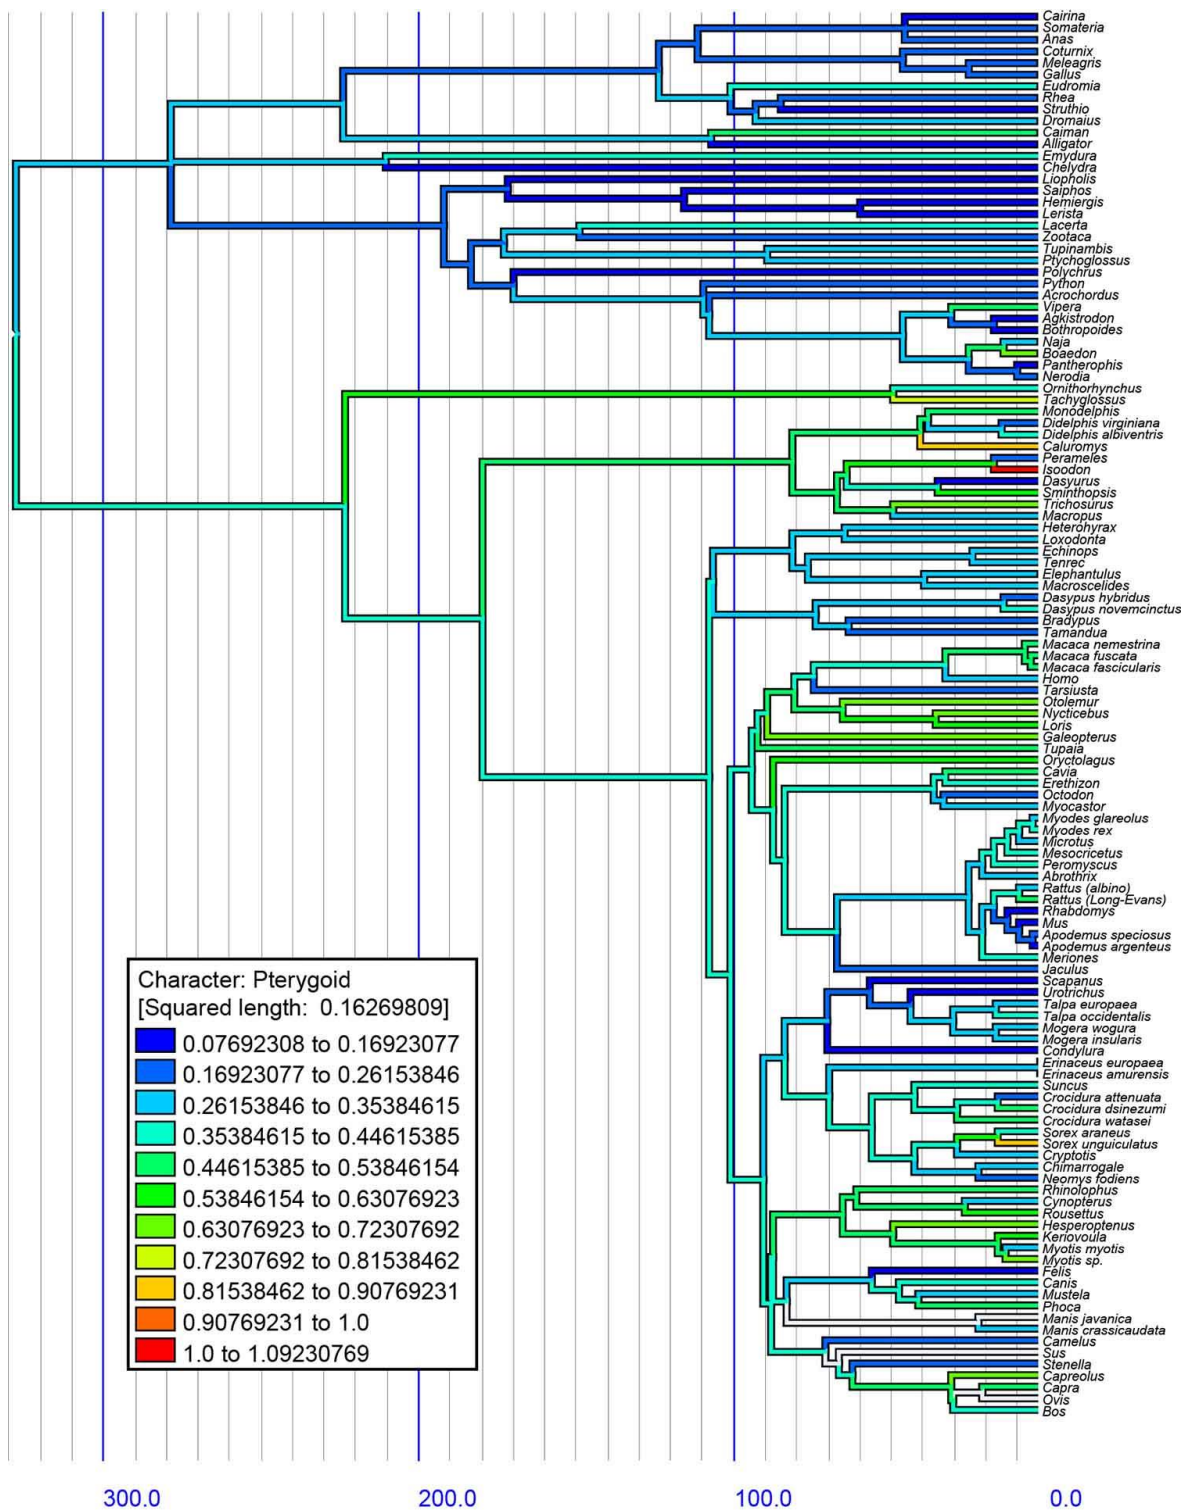

Supplementary Fig. 14. Reconstructed heterochrony of relative timing of the pterygoid, using squared-change parsimony.

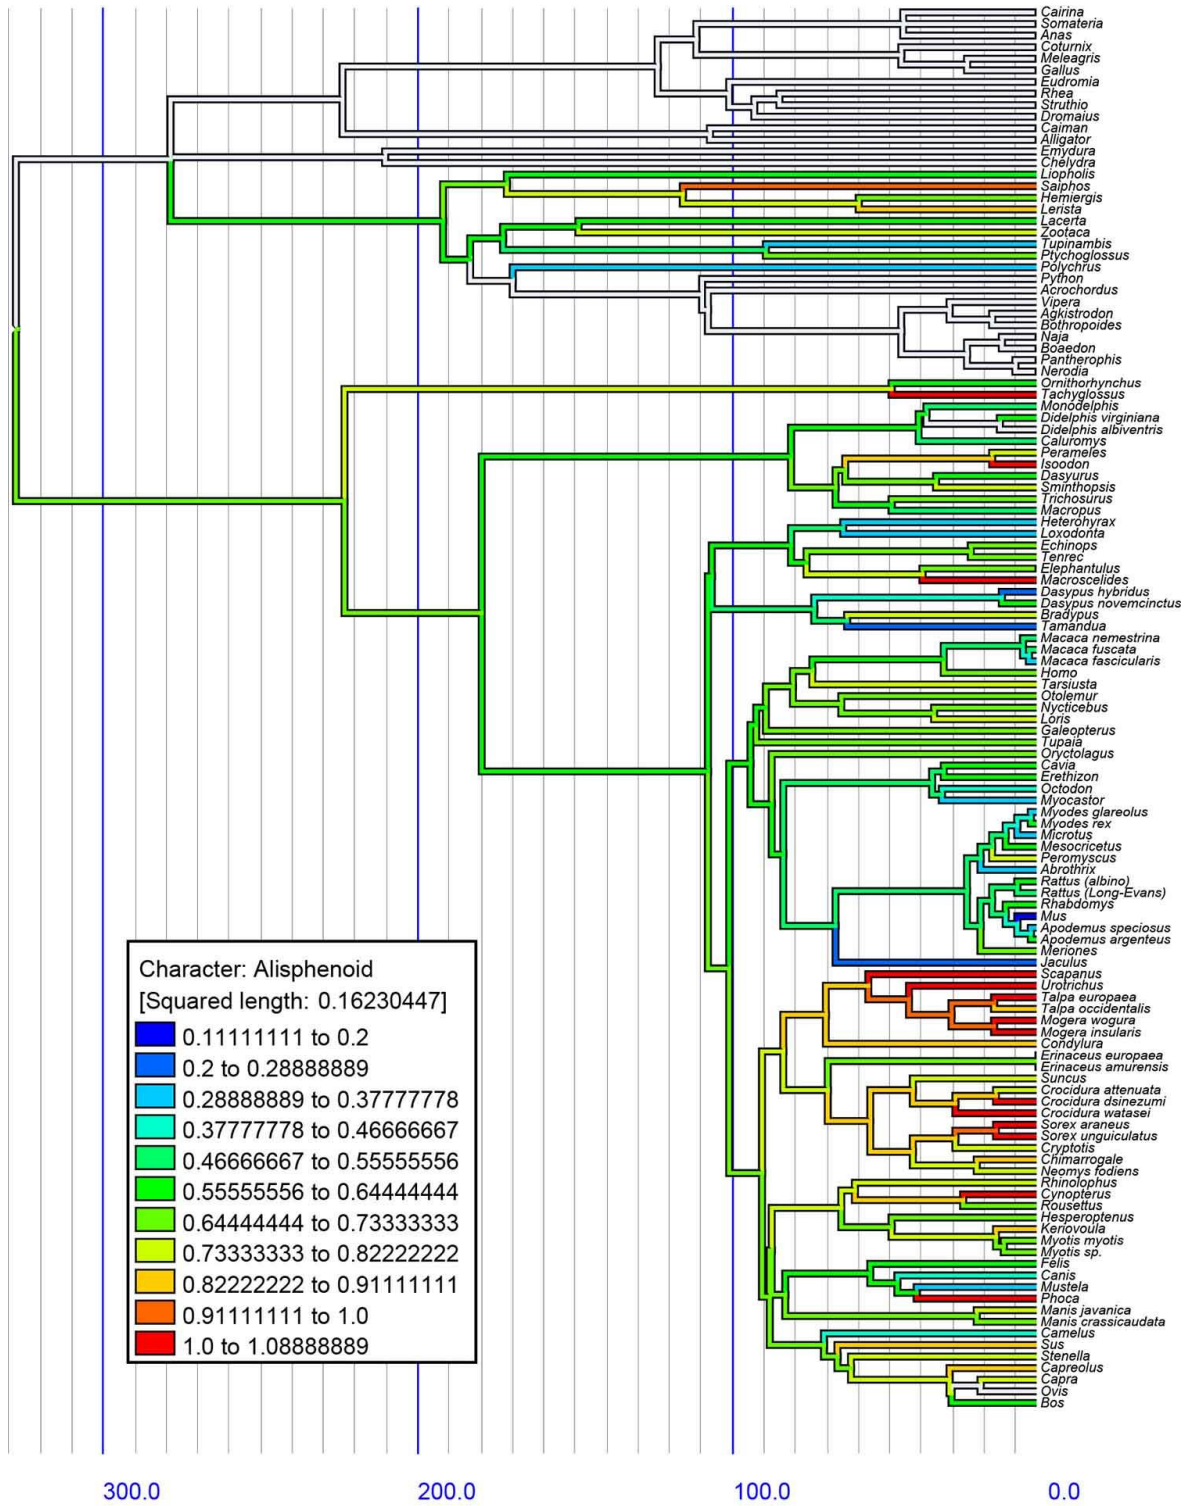

Supplementary Fig. 15. Reconstructed heterochrony of relative timing of the alisphenoid, using squared-change parsimony.

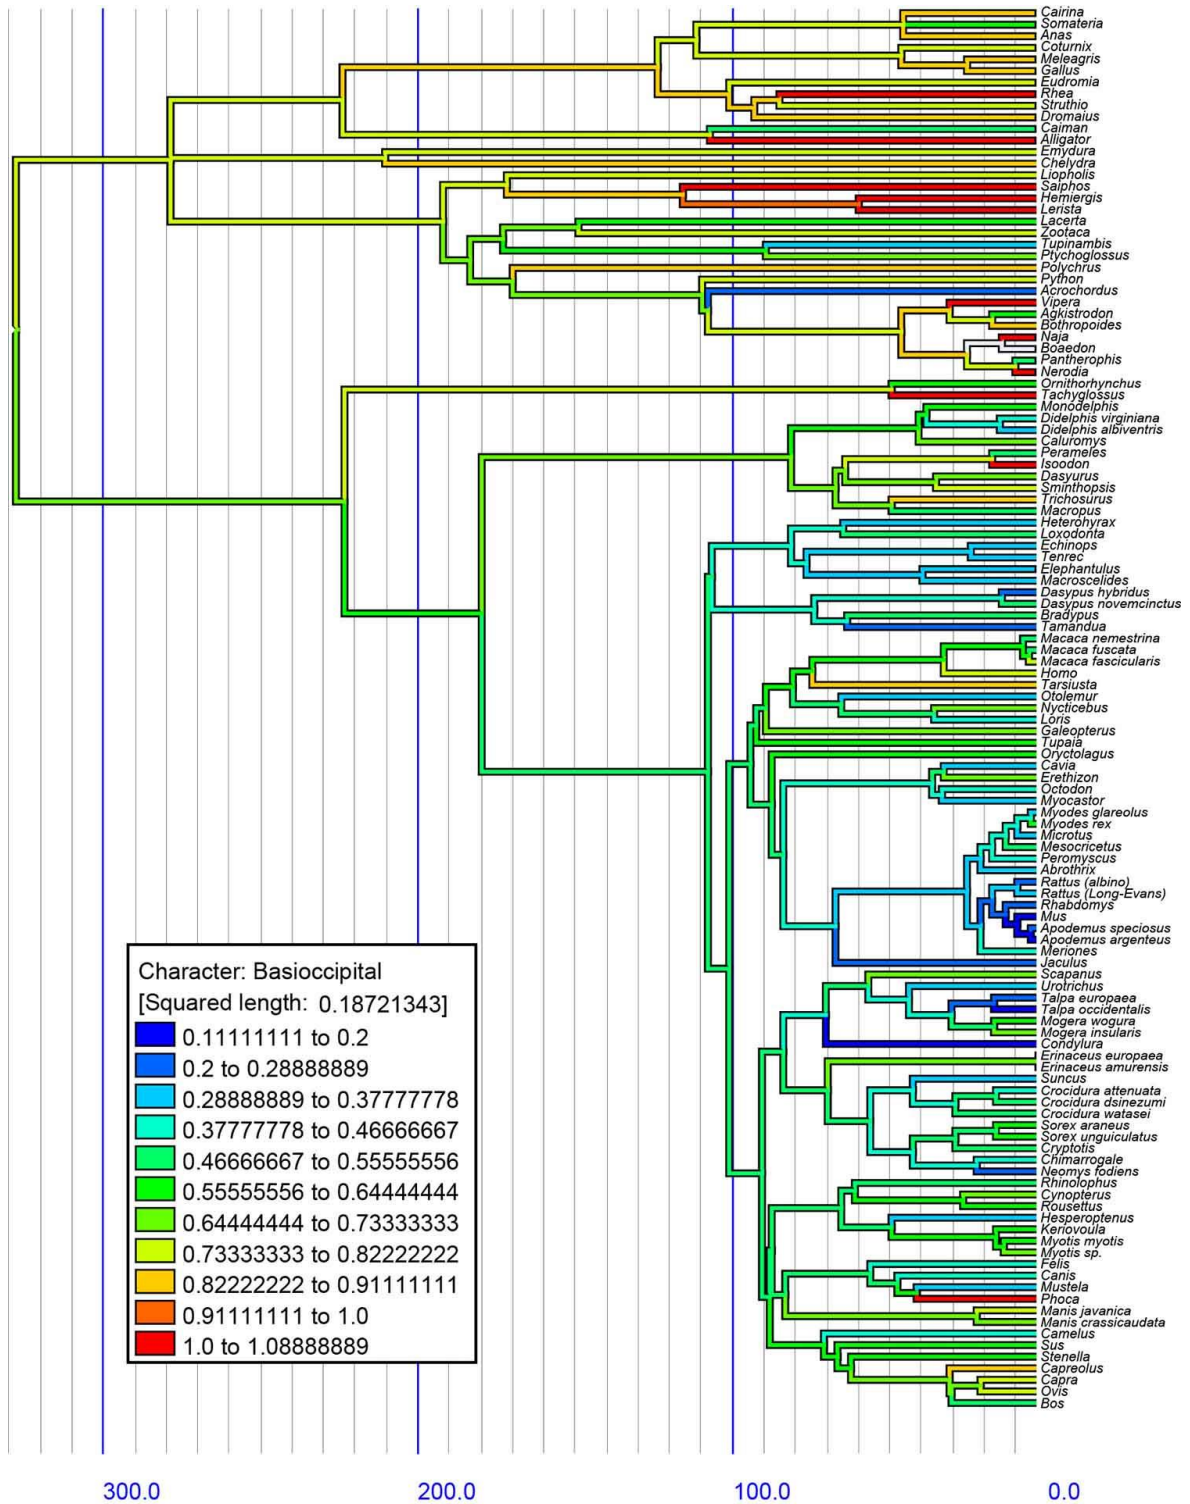

Supplementary Fig. 16. Reconstructed heterochrony of relative timing of the basioccipital, using squared-change parsimony.



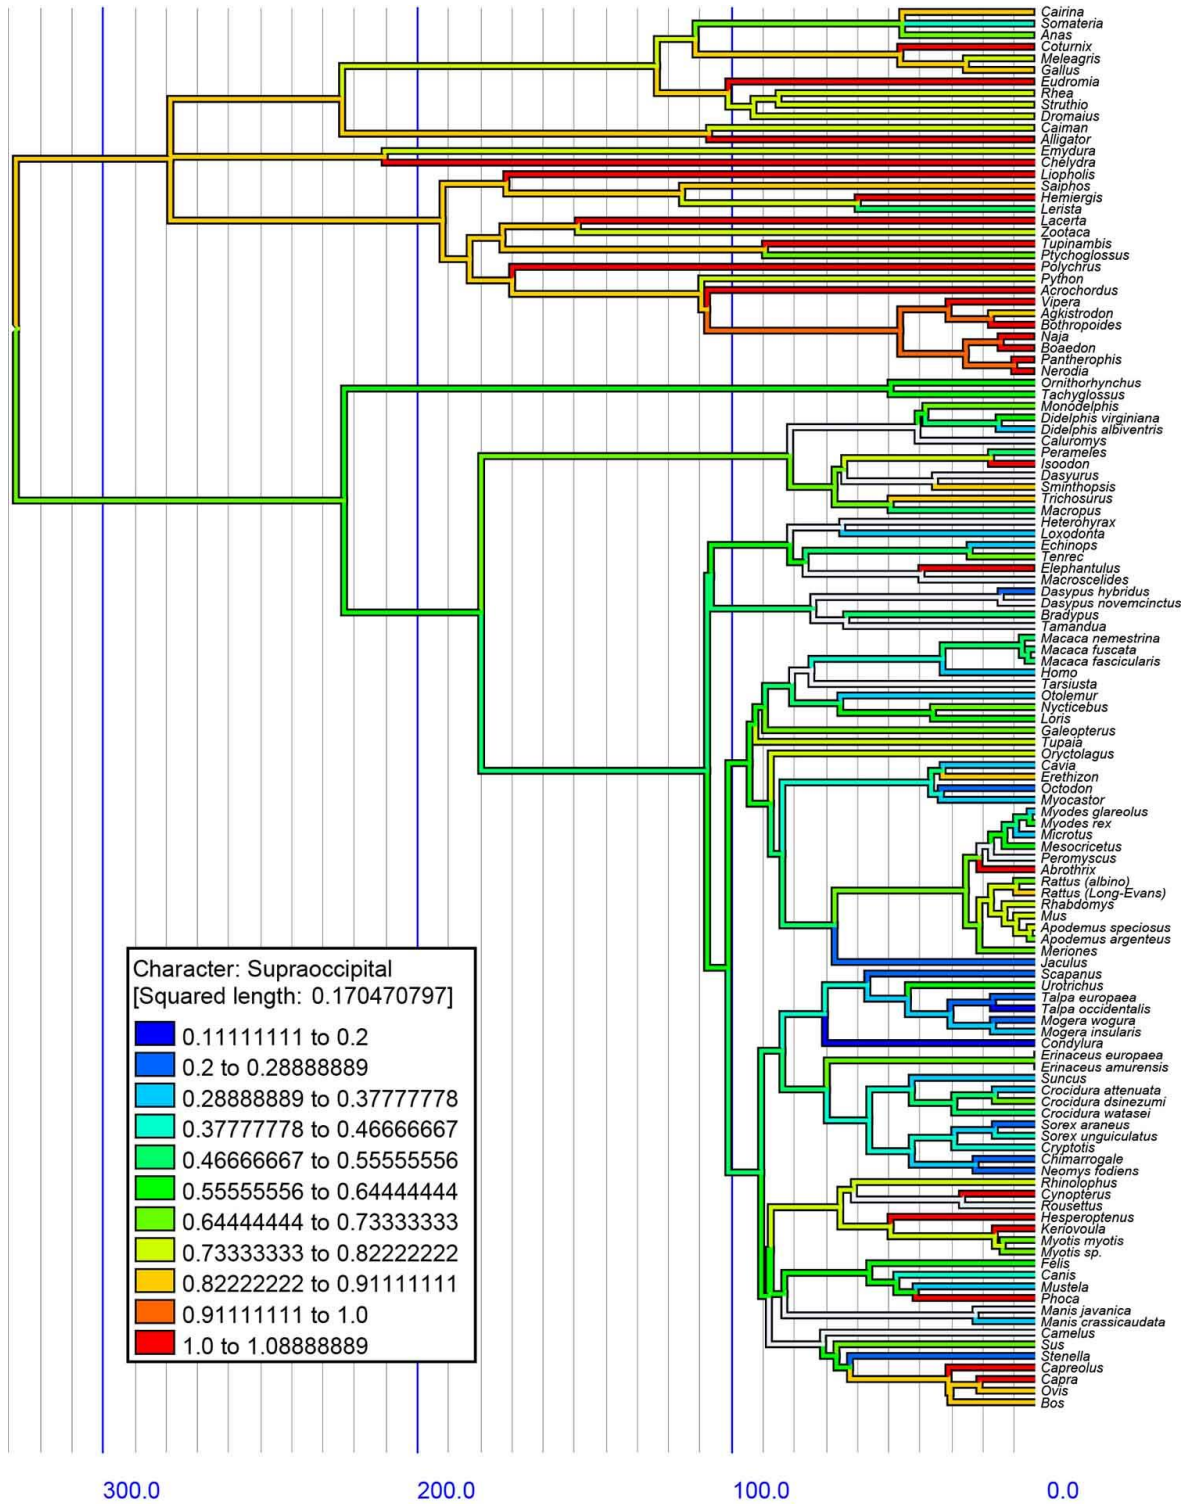

Supplementary Fig. 17. Reconstructed heterochrony of relative timing of the supraoccipital, using squared-change parsimony.

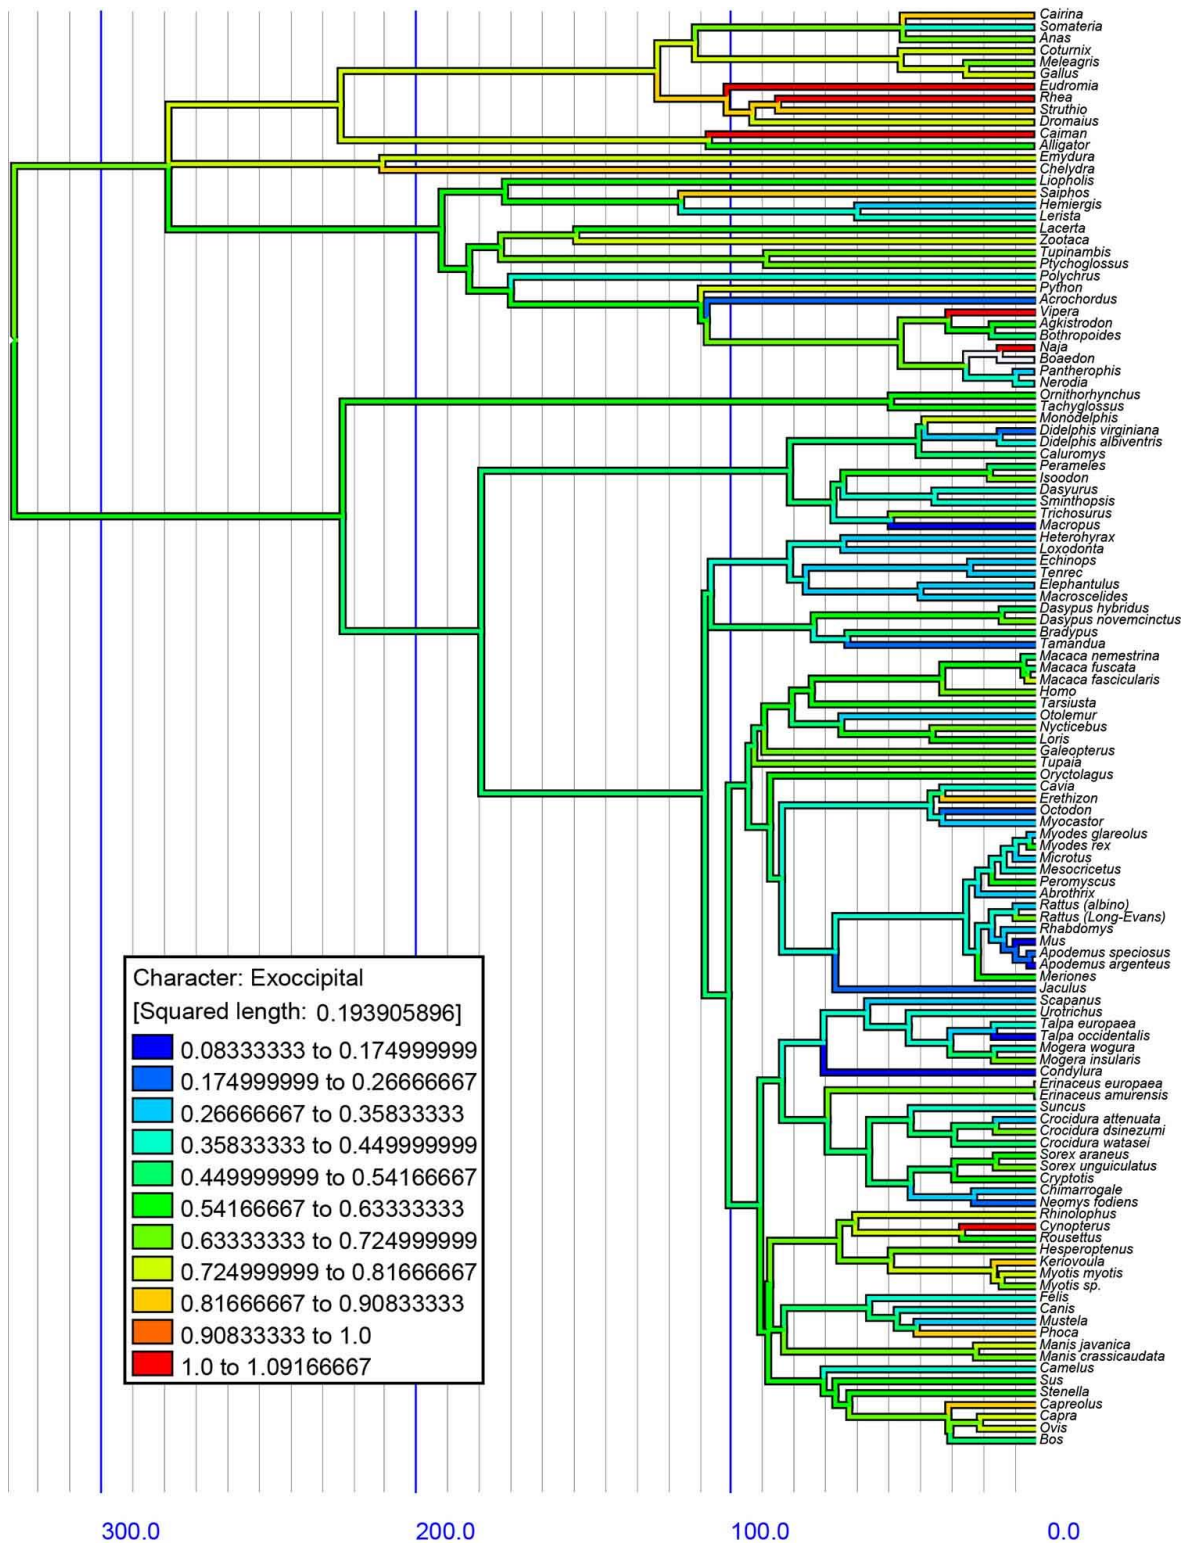

Supplementary Fig. 18. Reconstructed heterochrony of relative timing of the exoccipital, using squared-change parsimony.



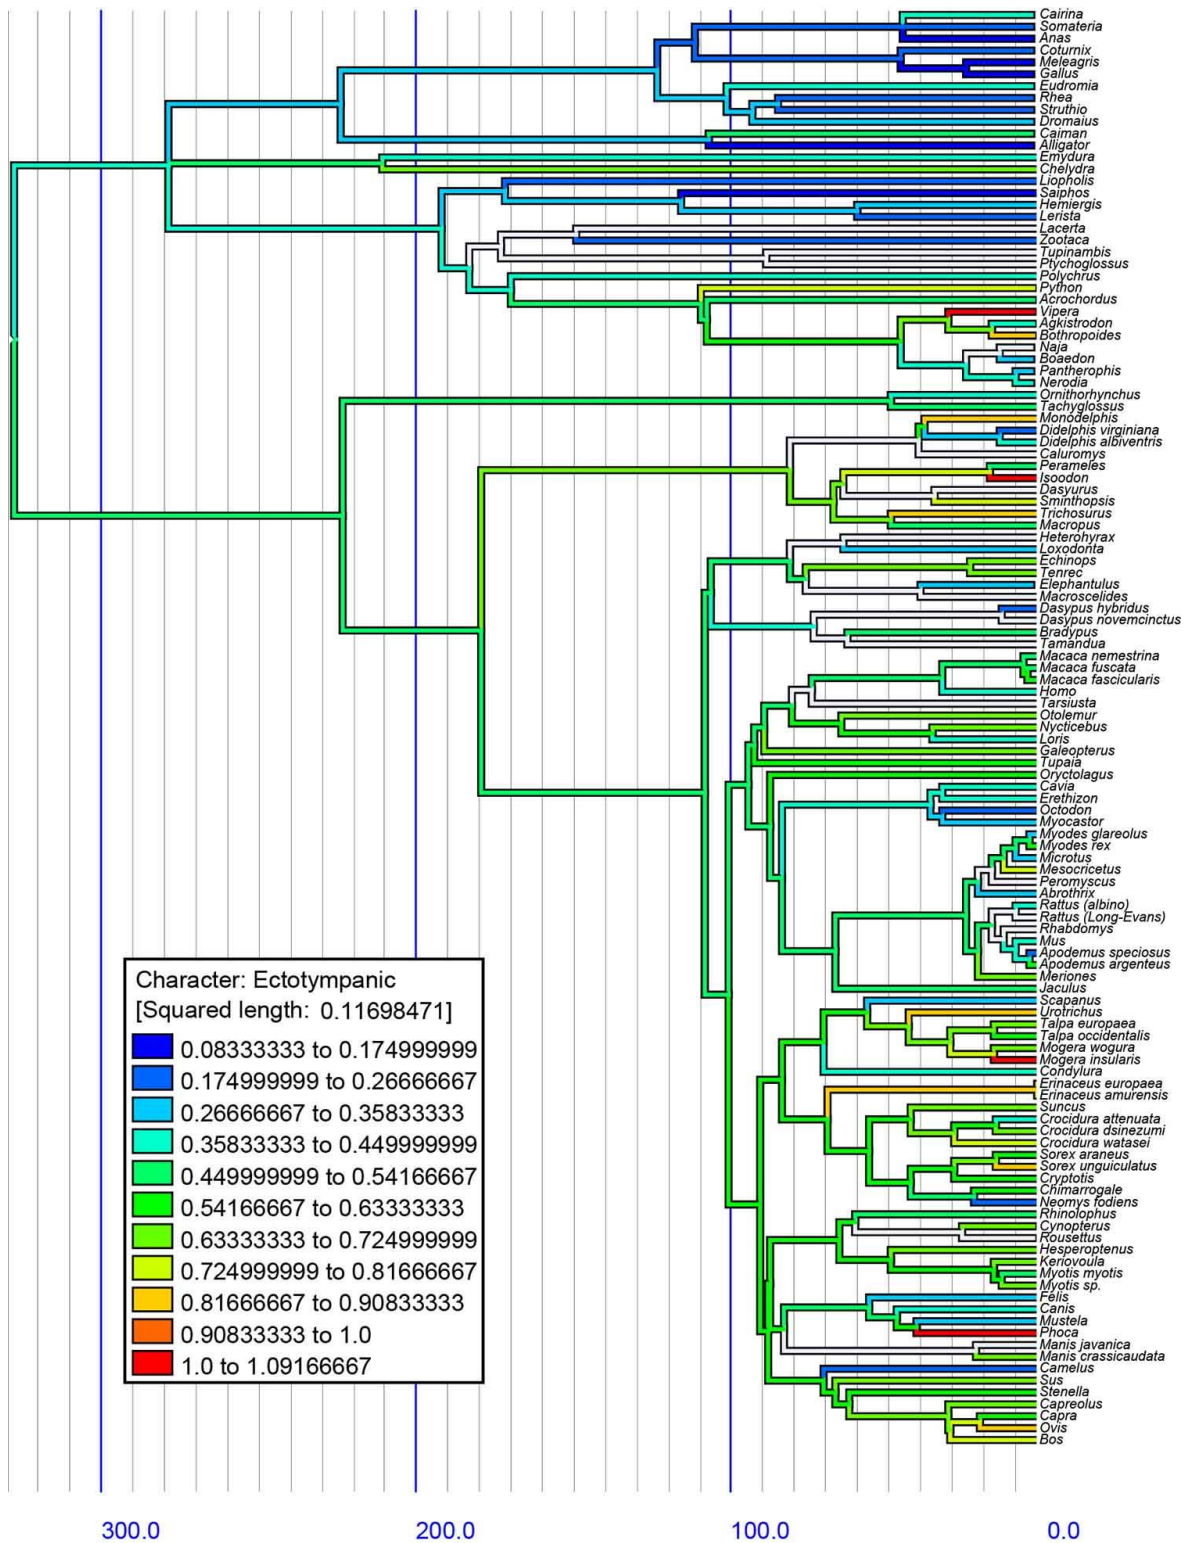

Supplementary Fig. 19. Reconstructed heterochrony of relative timing of the ectotympanic, using squared-change parsimony.





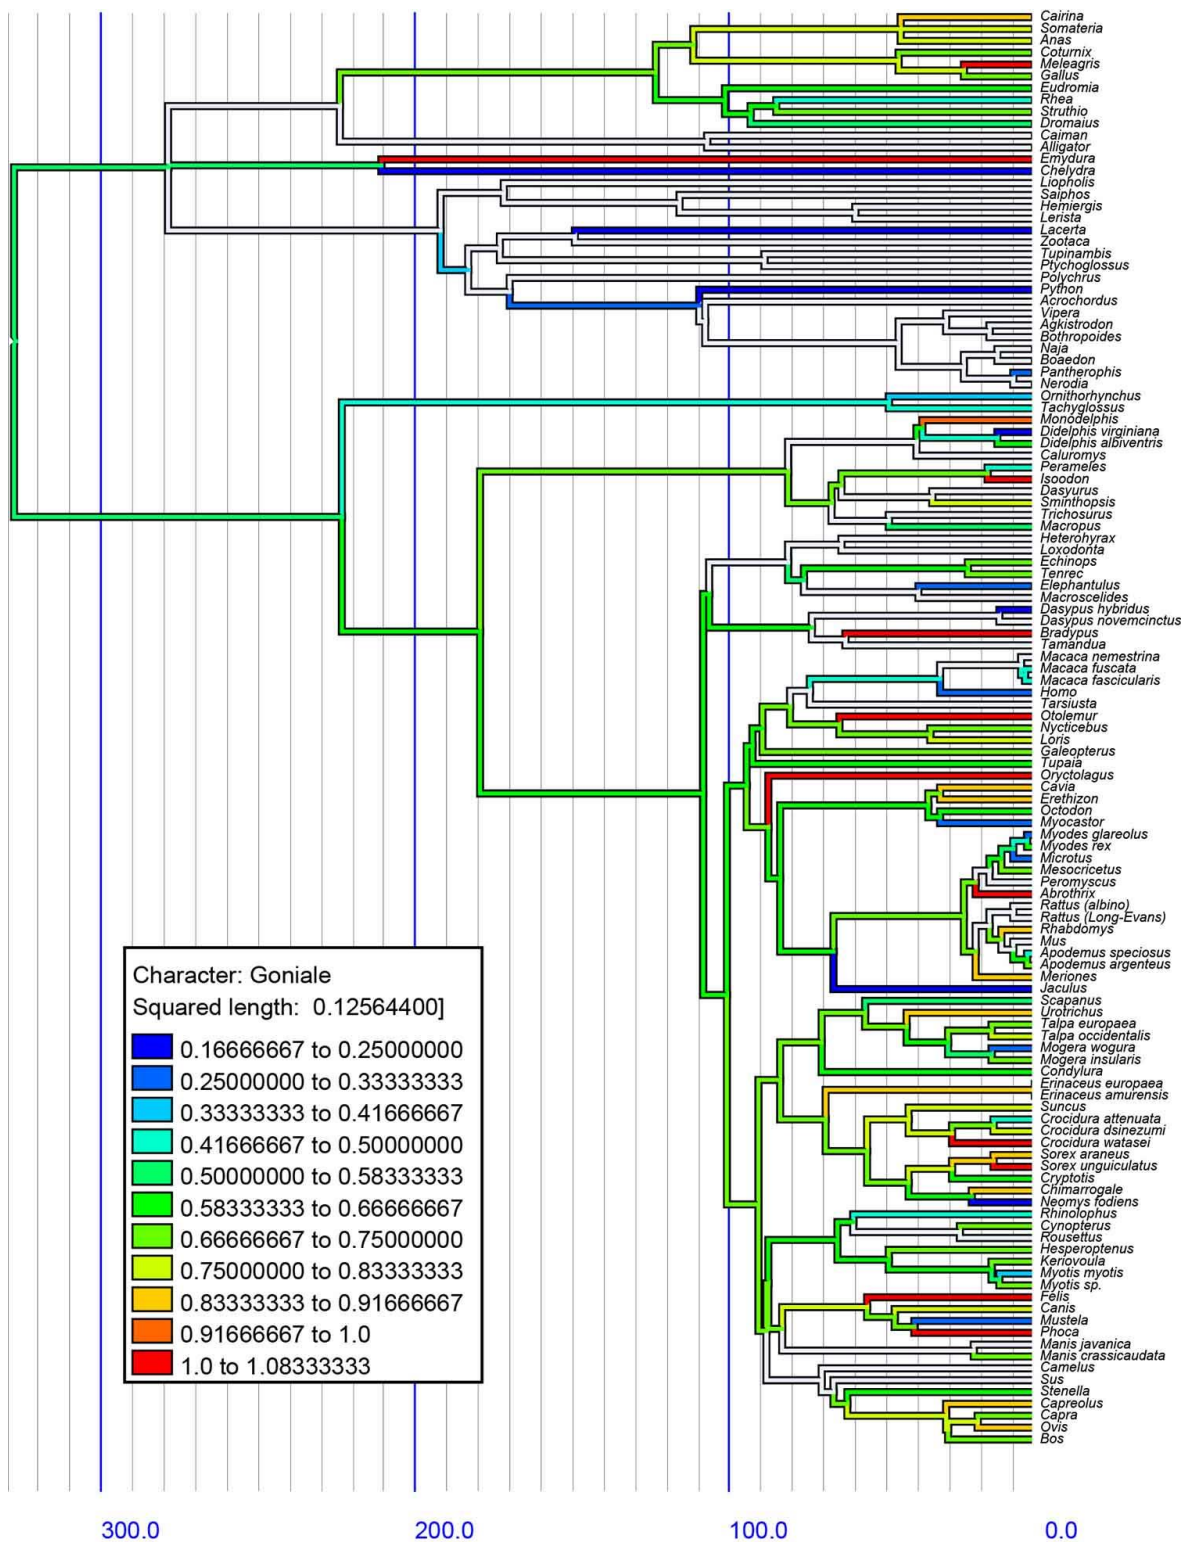

Supplementary Fig. 20. Reconstructed heterochrony of relative timing of the goniale, using squared-change parsimony.

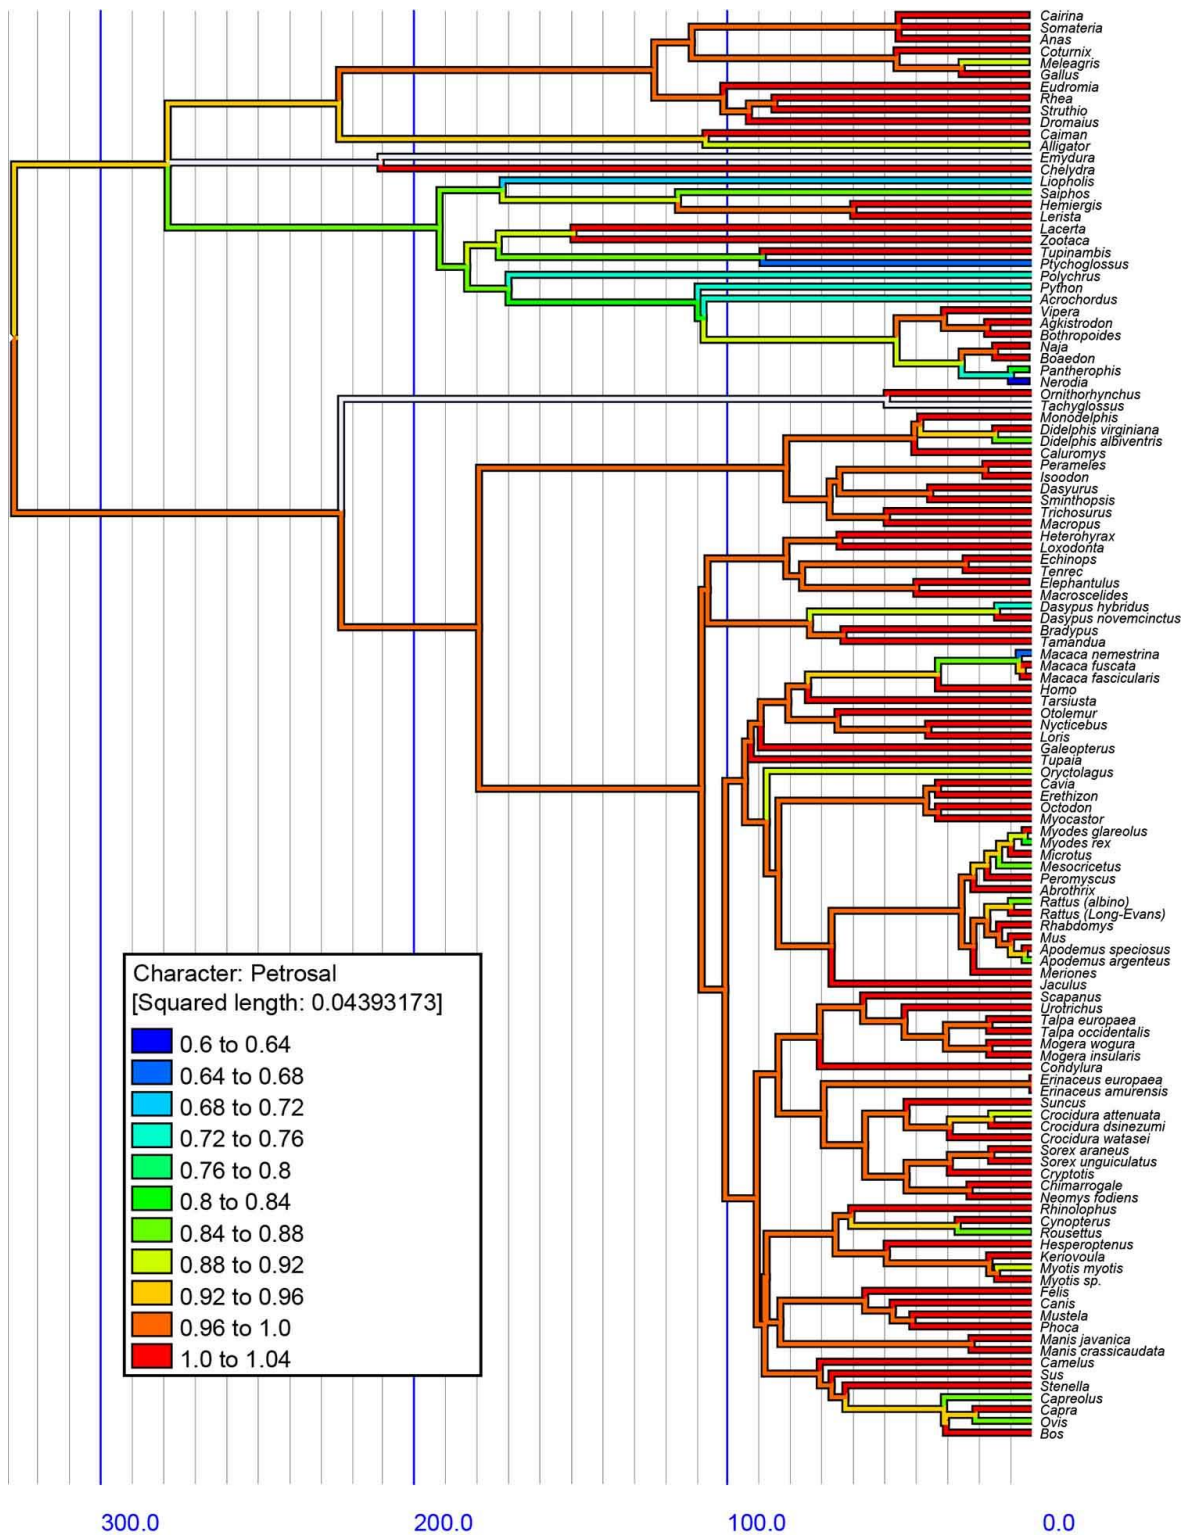

Supplementary Fig. 21. Reconstructed heterochrony of relative timing of the petrosal, using squared-change parsimony.

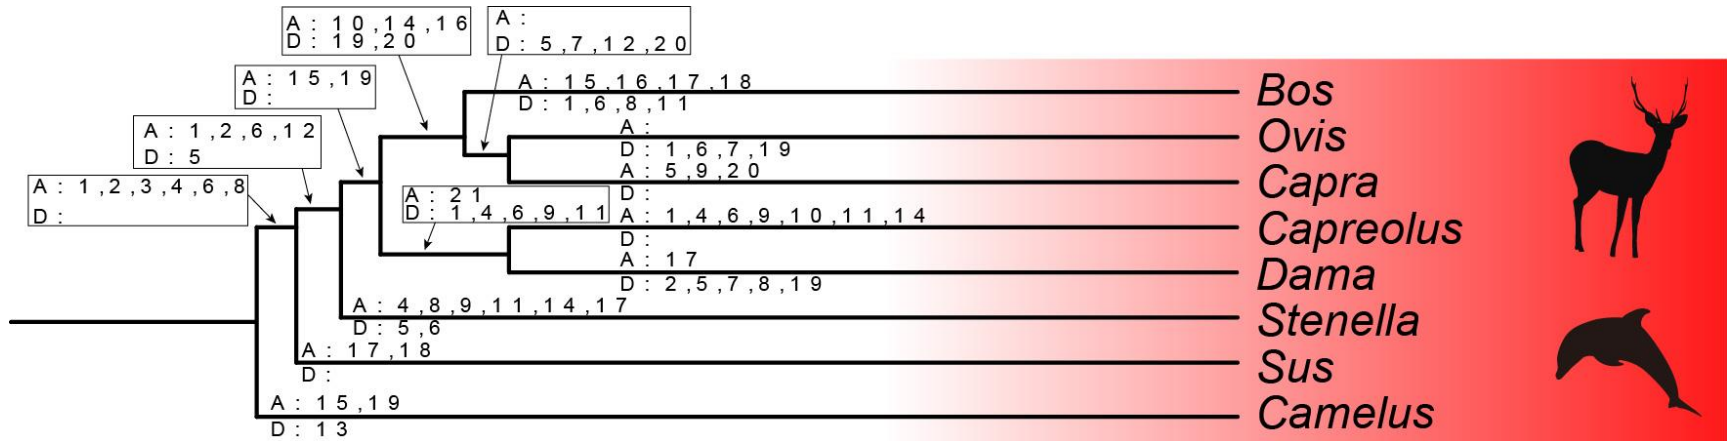

**Supplementary Fig. 22.** Sequence shifts recovered by the PGI analysis for inclusive clades (Cetartiodactyls). Abbreviations: A, acceleration; D, delay. See Fig. 2 for element identities.



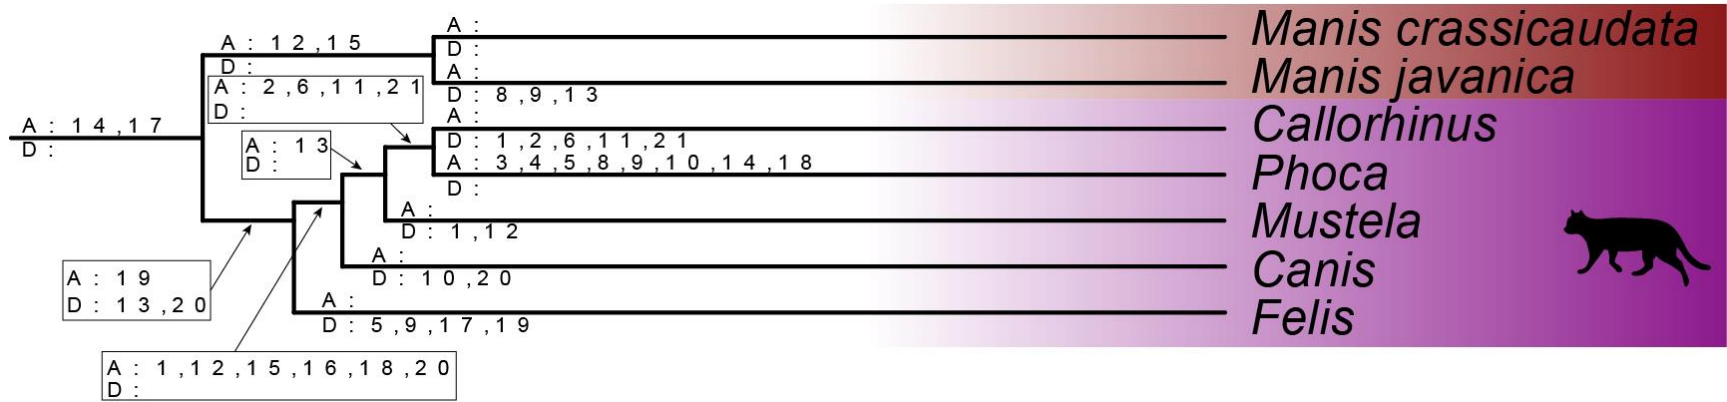

**Supplementary Fig. 23. Sequence shifts recovered by the PGI analysis for inclusive clades (Carnivora and Pholidota).** Abbreviations: A, acceleration; D, delay. See Fig. 2 for element identities.

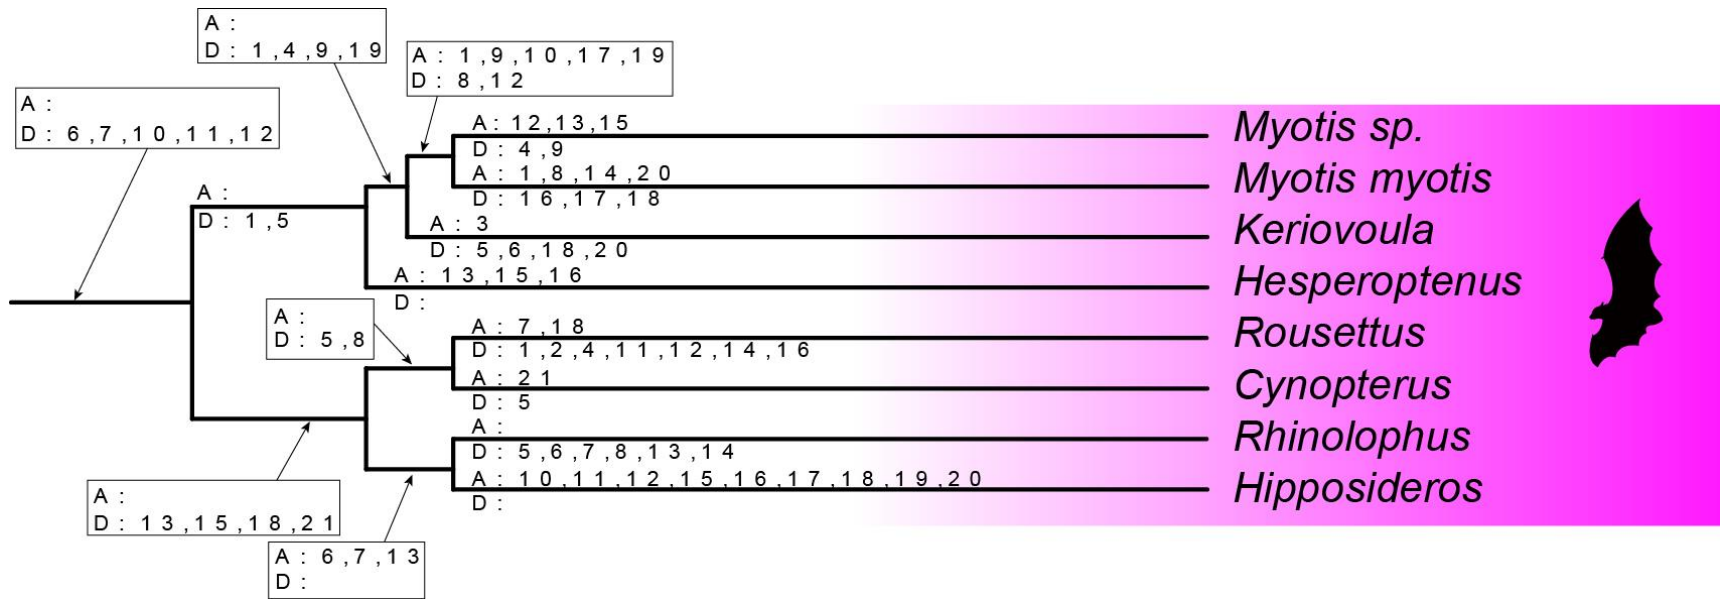

**Supplementary Fig. 24. Sequence shifts recovered by the PGI analysis for inclusive clades (Chiroptera).** Abbreviations: A, acceleration; D, delay. See Fig. 2 for element identities.

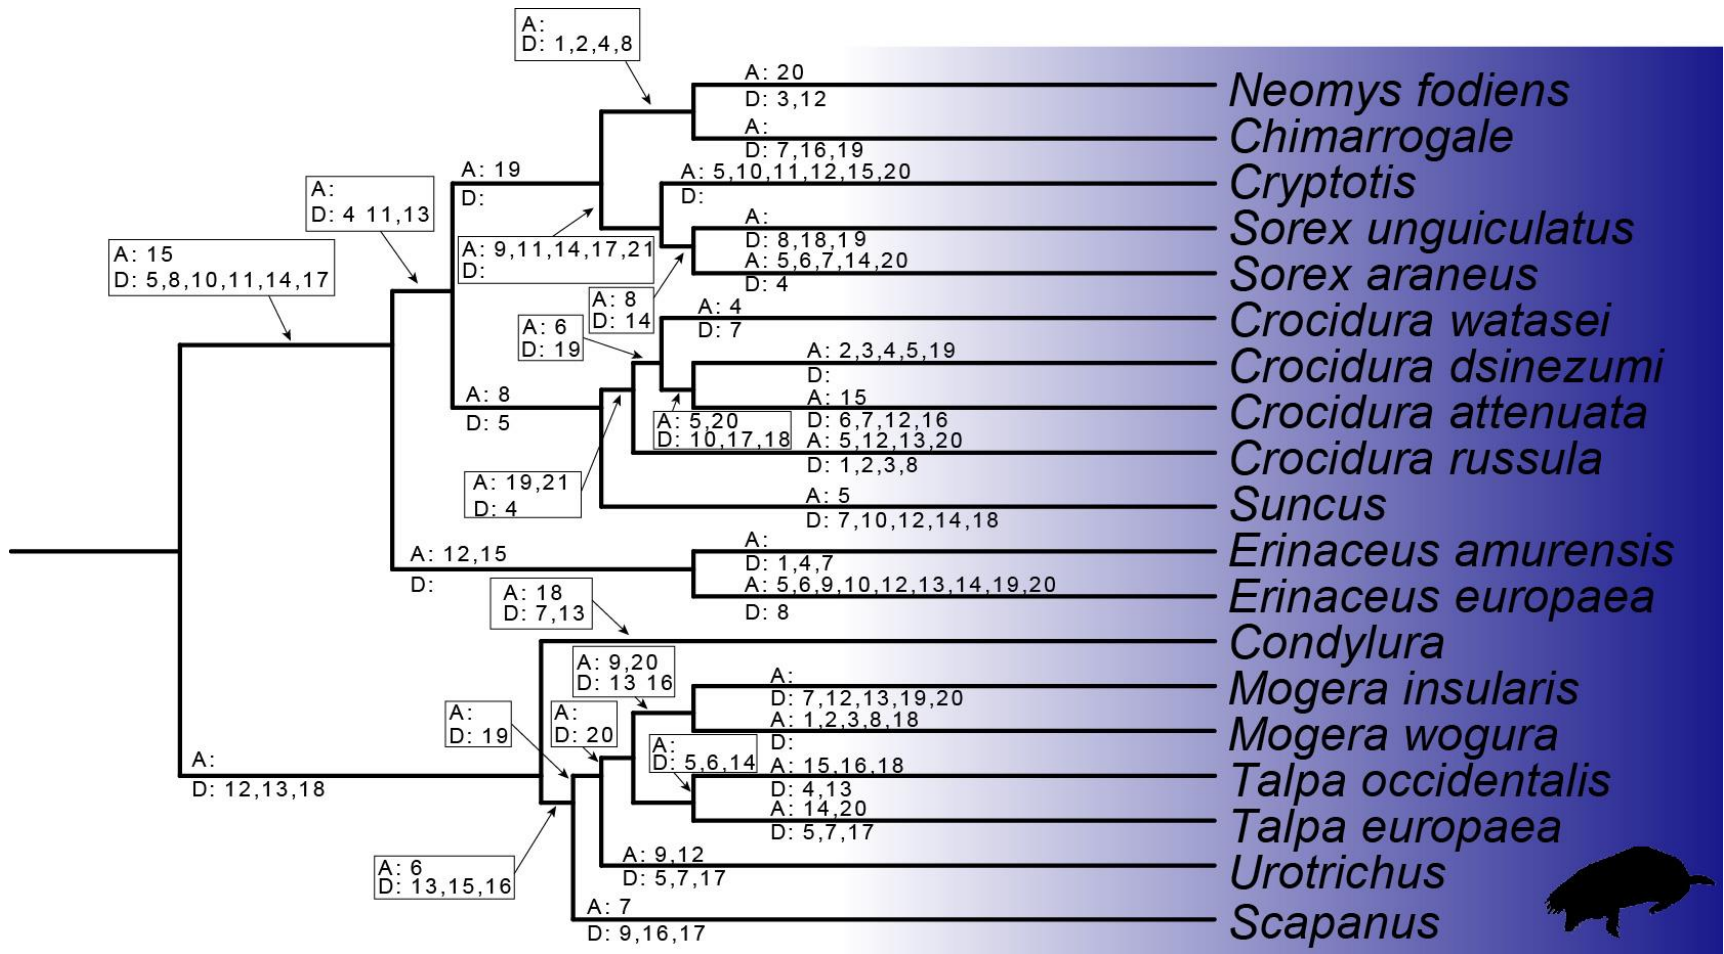

**Supplementary Fig. 25.** Sequence shifts recovered by the PGI analysis for inclusive clades (Lipotyphla). Abbreviations: A, acceleration; D, delay. See Fig. 2 for element identities.

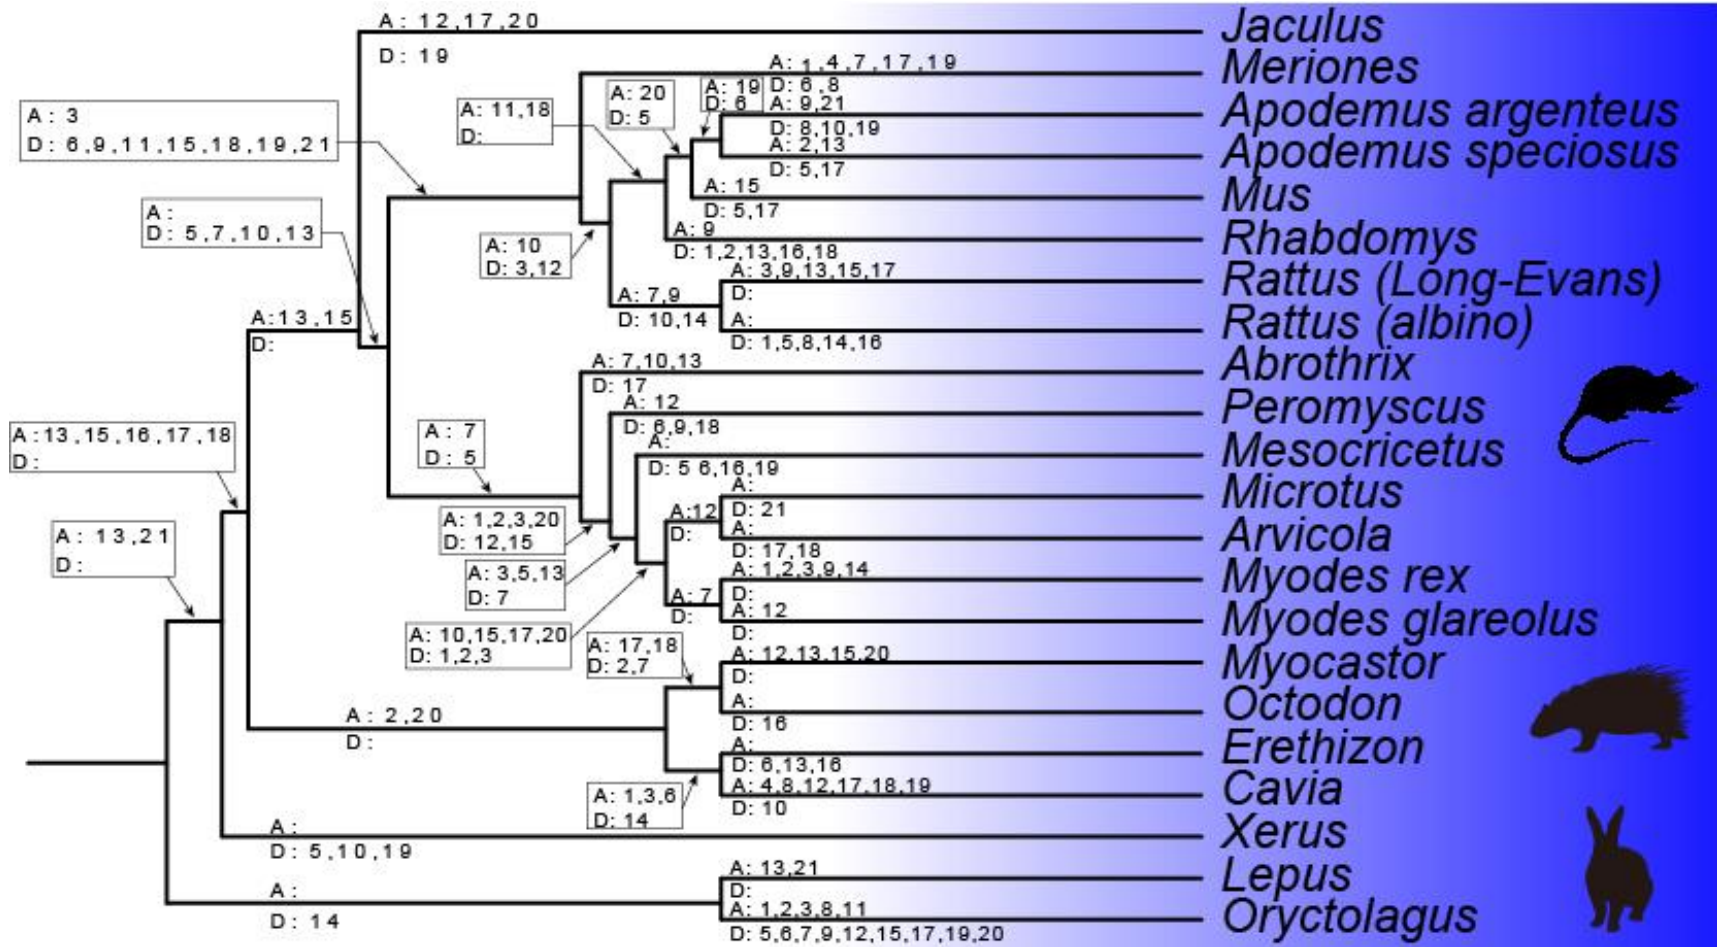

Supplementary Fig. 26. Sequence shifts recovered by the PGi analysis for inclusive clades (Glires). Abbreviations: A, acceleration; D, delay. See Fig. 2 for element identities.



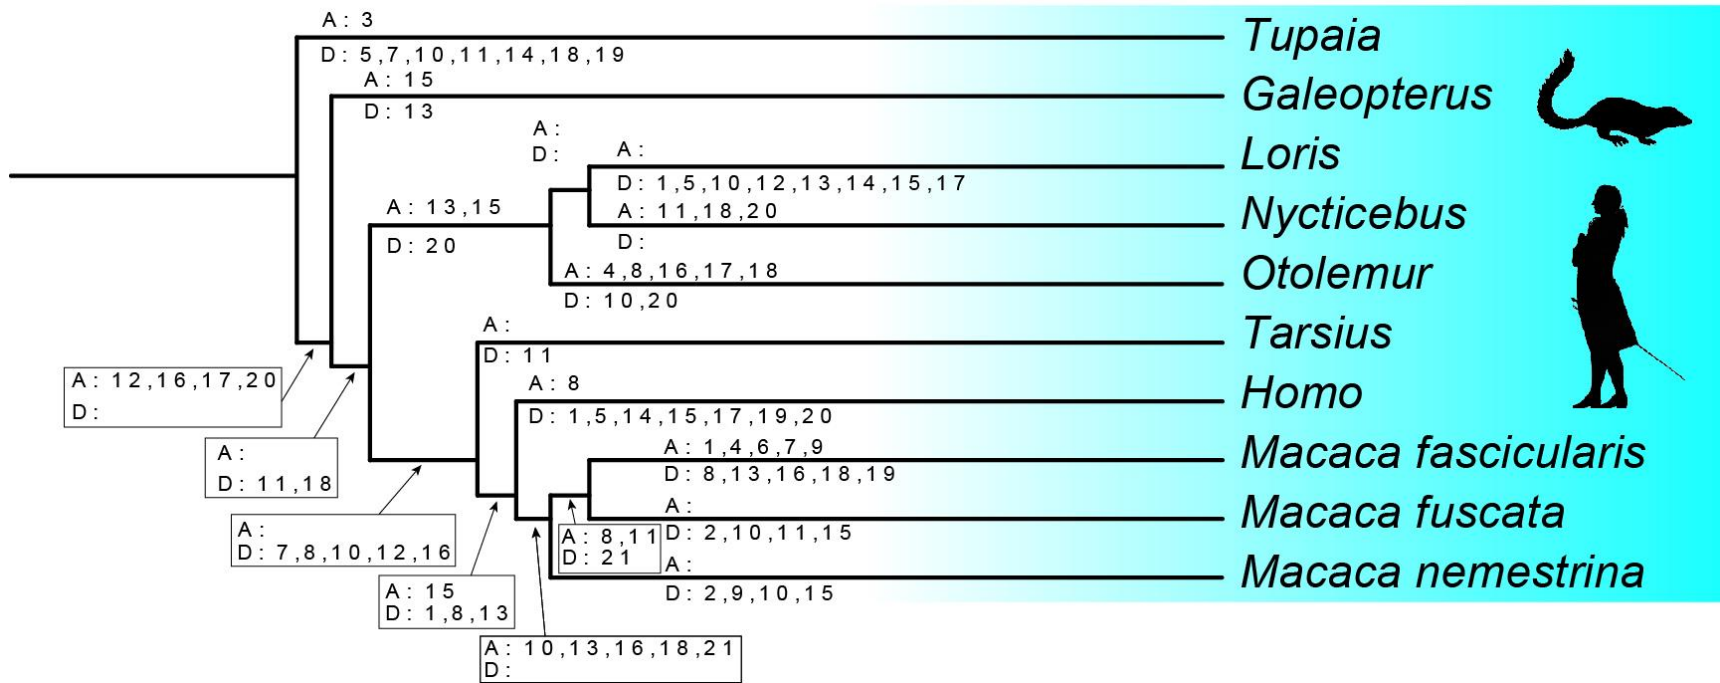

**Supplementary Fig. 27. Sequence shifts recovered by the PGI analysis for inclusive clades (Primates, Scandentia, and Dermoptera).** Abbreviations: A, acceleration; D, delay. See Fig. 2 for element identities.

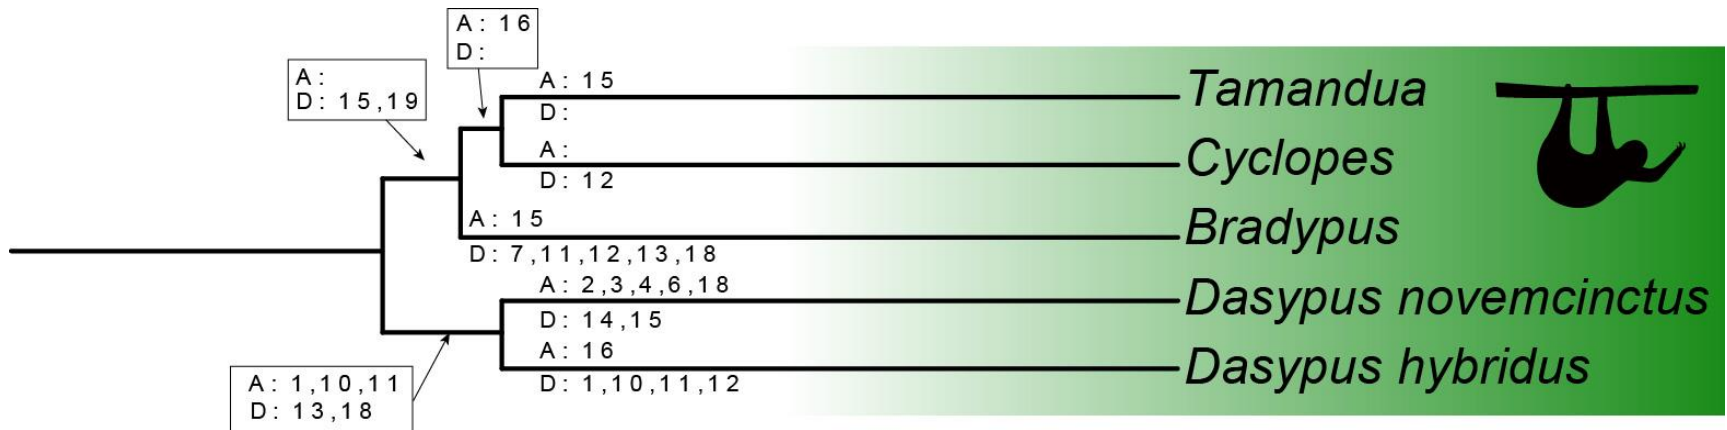

**Supplementary Fig. 28. Sequence shifts recovered by the PGI analysis for inclusive clades (Xenarthra).** Abbreviations: A, acceleration; D, delay. See Fig. 2 for element identities.

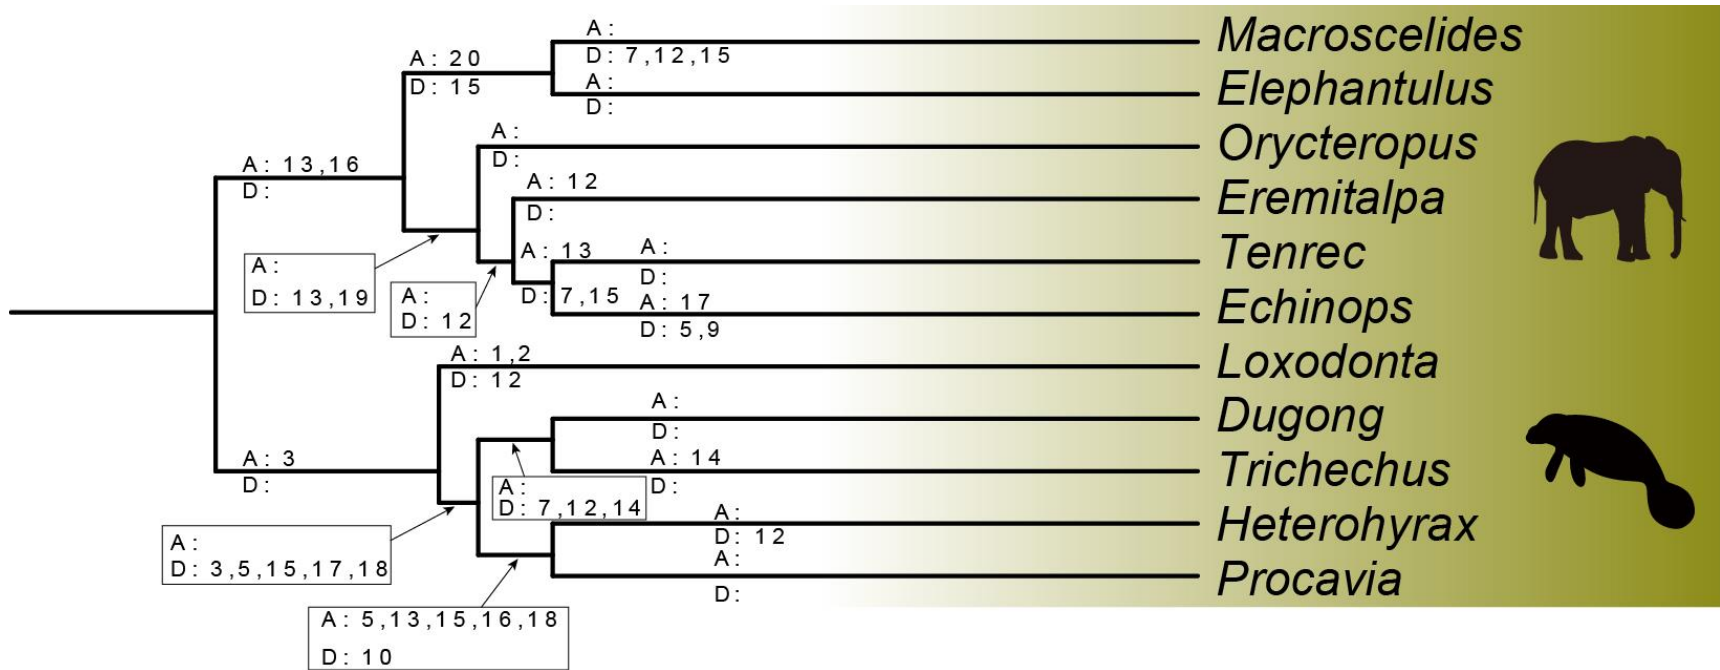

**Supplementary Fig. 29. Sequence shifts recovered by the PGI analysis for inclusive clades (Afrotheria).** Abbreviations: A, acceleration; D, delay. See Fig. 2 for element identities.

**Supplementary Table 1. References and calculation of divergence time of each node of the composed topology.** Reference 1 = chapters of the *Timetree of Life*". Age 1 = age as inferred in Reference 1; Reference 2 = literature reference for the age of a subclade; Age 2 = age as inferred in Reference 2; \* = indicates the overlap of a major node of Reference 1 and the deepest node in Reference 2: for this overlap a Factor was calculated between Age 1 and Age 2, which was then used to calculate Age 3 in the related subclades of this clade in order to normalize Age 2 to the consistent, amniote wide age estimate of Reference 1 (Age 1). Age 3 = inferred divergence time of each node used to scale the composed topology. If no reference was available for the age of a particular node, the branch lengths of the containing subclades were evenly distributed. If not the exact taxon composition was compared in Reference 1 and 2, a comment is made to Reference 2. Ages in million years, rounded to two decimal places. Node numbers of terminal taxa (species) are not listed and their age was set to 0.

| Node | Taxon name                       | Reference 1 ( <i>Timetree of Life</i> ) | Age 1   | Reference 2                   | Age 2    | Factor | Age 3       |
|------|----------------------------------|-----------------------------------------|---------|-------------------------------|----------|--------|-------------|
| 2    | Amniota                          | Shedlock and Edwards <sup>1</sup>       | 324.5   | -                             | -        | -      | 324.5       |
| 3    | Sauropsida                       | Shedlock and Edwards <sup>1</sup>       | 274.9   | -                             | -        | -      | 274.9       |
| 4    | Archosauria                      | Shedlock and Edwards <sup>1</sup>       | 219.2   | -                             | -        | -      | 219.2       |
| 5    | Aves                             | van Tuinen <sup>2</sup>                 | 119     | -                             | -        | -      | 119         |
| 6    | Galloanserae                     | Pereia and Baker <sup>3</sup>           | 106.90* | Slack <sup>4</sup>            | 77.1     | 1.39   | 106.9       |
| 7    | Anatidae                         | -                                       | -       | Slack <sup>4</sup>            | 29.6     | 1.39   | 41          |
| 11   | Phasianidae (Galliformes)        | -                                       | -       | Slack <sup>4</sup>            | 29.9     | 1.39   | 41.5        |
| 13   | <i>Meleagris /Gallus</i>         | -                                       | -       | -                             | -        | -      | 20.75       |
| 16   | Palaeognathae                    | Baker and Pereia <sup>5</sup>           | 96.7    | -                             | -        | -      | 96.7        |
| 18   | <i>Dromaius +Rhea/Struthio</i>   | -                                       | -       | -                             | -        | -      | 88.65       |
| 19   | <i>Rhea /Struthio</i>            | Baker and Pereia <sup>5</sup>           | 80.6    | -                             | -        | -      | 80.6        |
| 23   | Crocodylia                       | Brochu <sup>6</sup>                     | 102.6   | -                             | -        | -      | 102.6       |
| 26   | Testudines                       | Shaffer <sup>7</sup>                    | 207     | -                             | -        | -      | 207         |
| 29   | Unidentata (Scincidae+Lacertata) | Hedges and Vidal <sup>8</sup>           | 188.30* | Vidal and Hedges <sup>9</sup> | 215      | 0.88   | 188.3       |
| 30   | Scincidae                        | -                                       | -       | Vidal and Hedges <sup>9</sup> | min. 192 | 0.88   | min. 168.20 |
| 32   | NN                               | -                                       | -       | -                             | -        | -      | 112.13      |
| 34   | NN                               | -                                       | -       | -                             | -        | -      | 56.07       |
| 37   | Episquamata                      | Hedges and Vidal <sup>8</sup>           | 179.7   | -                             | -        | -      | 179.7       |
| 38   | Lacertata                        | Hedges and Vidal <sup>8</sup>           | 169.30* | Vidal and Hedges <sup>9</sup> | 177      | 0.96   | 169.3       |



|     |                                                                 |                                      |         |                                     |          |      |            |
|-----|-----------------------------------------------------------------|--------------------------------------|---------|-------------------------------------|----------|------|------------|
| 39  | Lacertiformes                                                   | -                                    | -       | Vidal and Hedges <sup>9</sup>       | min. 152 | 0.96 | min. 145.4 |
| 42  | Teiioidea                                                       | Hedges and Vidal <sup>8</sup>        | 85.5    | Vidal and Hedges <sup>9</sup>       | min. 177 | 0.96 | 85.5       |
| 45  | <i>Polychrus</i> +Serpentes                                     | Hedges and Vidal <sup>8</sup>        | 166.4   | -                                   | -        | -    | 166.4      |
| 47  | Alethinophidia (Serpentes)                                      | Vidal et al. <sup>10</sup>           | 105.80* | Burbik and Pyron <sup>9</sup>       | 93.5     | 1.13 | 105.8      |
| 49  | Caenophidia                                                     | Vidal et al. <sup>10</sup>           | 103.7   | -                                   | -        | -    | 103.7      |
| 51  | Colubroidea                                                     | -                                    | -       | Burbik and Pyron <sup>9</sup>       | 37.2     | 1.13 | 42.1       |
| 52  | Viperidae                                                       | -                                    | -       | Burbik and Pyron <sup>9</sup>       | 23.8     | 1.13 | 26.9       |
| 54  | Crotlinae                                                       | -                                    | -       | -                                   | -        | -    | 13.45      |
| 57  | NN                                                              | -                                    | -       | -                                   | -        | -    | 21.05      |
| 58  | NN                                                              | -                                    | -       | -                                   | -        | -    | 10.05      |
| 61  | Colubridae                                                      | -                                    | -       | -                                   | -        | -    | 5.38       |
| 64  | Mammalia                                                        | Madsen <sup>11</sup>                 | 220.2   | -                                   | -        | -    | 220.2      |
| 65  | Monotremata                                                     | Springer and Krajewski <sup>12</sup> | 45.9    | -                                   | -        | -    | 45.9       |
| 68  | Theria                                                          | Madsen <sup>11</sup>                 | 176.1   | -                                   | -        | -    | 176.1      |
| 69  | Marsupialia                                                     | Springer et al. <sup>12</sup>        | 78.1    | -                                   | -        | -    | 78.1       |
| 70  | Didelphimorphia                                                 | Springer et al. <sup>12</sup>        | 37.40*  | Bininda-Emonds et al. <sup>13</sup> | 56.1     | 0.67 | 37.4       |
| 71  | Didelphidae                                                     | -                                    | -       | Bininda-Emonds et al. <sup>13</sup> | 52.4     | 0.67 | 34.9       |
| 73  | <i>Didelphis</i>                                                | -                                    | -       | Bininda-Emonds et al. <sup>13</sup> | 17.3     | 0.67 | 11.5       |
| 77  | <i>Peramelis/Dasyurus</i> +Phalangeridae                        | Springer et al. <sup>12</sup>        | 63.90*  | Bininda-Emonds et al. <sup>13</sup> | 54.5     | 1.17 | 63.9       |
| 78  | <i>Peramelis/Dasyurus</i>                                       | Springer et al. <sup>12</sup>        | 60.7    | Meredith (2008)                     | 60       | 1.17 | 60.7       |
| 79  | Perameliidae                                                    | -                                    | -       | Bininda-Emonds et al. <sup>13</sup> | 12.2     | 1.17 | 14.3       |
| 82  | Dasyuridae                                                      | -                                    | -       | Bininda-Emonds et al. <sup>13</sup> | 27.4     | 1.17 | 32.1       |
| 85  | Phalangeridae (Trichosurus)/Macropodidae<br>( <i>Macropus</i> ) | Springer et al. <sup>12</sup>        | 46.1    | -                                   | -        | -    | 46.1       |
| 88  | Placentalia                                                     | Murphy and Eizirik <sup>14</sup>     | 104.7   | -                                   | -        | -    | 104.7      |
| 89  | Atlantogenata                                                   | Murphy and Eizirik <sup>14</sup>     | 103.3   | -                                   | -        | -    | 103.3      |
| 90  | Afrotheria                                                      | Murphy and Eizirik <sup>14</sup>     | 77.8    | -                                   | -        | -    | 77.8       |
| 91  | Proboscidae/Hydacoidea                                          | Murphy and Eizirik <sup>14</sup>     | 61.1    | -                                   | -        | -    | 61.1       |
| 94  | Macroscelidae/Afrosoricida                                      | Murphy and Eizirik <sup>14</sup>     | 73.00*  | Poux et al. <sup>15</sup>           | 71       | 1    | 73         |
| 95  | Tenrecidae                                                      | -                                    | -       | Poux et al. <sup>15</sup>           | 21       | 1    | 21         |
| 98  | Macroscelididae                                                 | -                                    | -       | -                                   | -        | -    | 36.5       |
| 101 | Xenarthra                                                       | Dulcec et al. <sup>16</sup>          | 70.50*  | Bininda-Emonds et al. <sup>13</sup> | 72.5     | 0.97 | 70.5       |
| 102 | <i>Dasybus</i>                                                  | -                                    | -       | Bininda-Emonds et al. <sup>13</sup> | 11.1     | 0.97 | 10.8       |
| 105 | Pilosa                                                          | Dulcec et al. <sup>16</sup>          | 60      | -                                   | -        | -    | 60         |
| 108 | Boreoeutheria                                                   | Murphy and Eizirik <sup>14</sup>     | 97.4    | -                                   | -        | -    | 97.4       |
| 109 | Euarchontoglires                                                | Murphy and Eizirik <sup>14</sup>     | 91      | -                                   | -        | -    | 91         |

|     |                                                     |                                  |        |                               |       |      |       |
|-----|-----------------------------------------------------|----------------------------------|--------|-------------------------------|-------|------|-------|
| 110 | Euarchonta                                          | Murphy and Eizirik <sup>14</sup> | 89.1   | -                             | -     | -    | 89.1  |
| 111 | <i>Galeopterus</i> + Primates                       | Murphy and Eizirik <sup>14</sup> | 86.2   | -                             | -     | -    | 86.2  |
| 112 | Primates                                            | Steiper and Young <sup>17</sup>  | 77.5   | -                             | -     | -    | 77.5  |
| 113 | Haplorhini                                          | Steiper and Young <sup>17</sup>  | 71.1   | -                             | -     | -    | 71.1  |
| 114 | Catarrhini                                          | Steiper and Young <sup>17</sup>  | 29.60* | Perelman et al. <sup>18</sup> | 31.56 | 0.94 | 29.6  |
| 115 | <i>Macaca nemestrina/M. fuscata/M. fascicularis</i> | -                                | -      | Perelman et al. <sup>18</sup> | 4.13  | 0.94 | 4     |
| 117 | <i>Macaca fuscata/M. fascicularis</i>               | -                                | -      | Perelman et al. <sup>18</sup> | 2.77  | 0.94 | 2.7   |
| 122 | Strepsirrhini                                       | Steiper and Young <sup>17</sup>  | 61.90* | Perelman et al. <sup>18</sup> | 40.34 | 1.53 | 61.9  |
| 124 | Lorisinae                                           | -                                | -      | Perelman et al. <sup>18</sup> | 21.14 | 1.53 | 32.4  |
| 129 | Glires                                              | Murphy and Eizirik <sup>14</sup> | 86.4   | -                             | -     | -    | 86.4  |
| 131 | Rodentia ( <i>Cavia/Mus</i> )                       | Honeycutt <sup>19</sup>          | 82.8   | -                             | -     | -    | 82.8  |
| 132 | Caviomorpha                                         | Honeycutt <sup>19</sup>          | 35.3   | -                             | -     | -    | 35.3  |
| 133 | <i>Cavia/Erethizon</i>                              | Honeycutt <sup>19</sup>          | 31.7   | -                             | -     | -    | 31.7  |
| 136 | <i>Octodon/Myocastor</i>                            | Honeycutt <sup>19</sup>          | 32     | -                             | -     | -    | 32    |
| 139 | <i>Jaculus/Mus</i>                                  | Honeycutt <sup>19</sup>          | 66     | -                             | -     | -    | 66    |
| 140 | Muridae+Cricetidae                                  | Honeycutt <sup>19</sup>          | 24     | -                             | -     | -    | 24    |
| 141 | NN                                                  | -                                | -      | -                             | -     | -    | 20    |
| 142 | NN                                                  | -                                | -      | -                             | -     | -    | 16    |
| 143 | <i>Mesocricetus/Microtus</i>                        | -                                | -      | -                             | -     | -    | 12    |
| 144 | NN                                                  | -                                | -      | -                             | -     | -    | 8     |
| 145 | NN                                                  | -                                | -      | -                             | -     | -    | 4     |
| 152 | Muridae                                             | -                                | -      | -                             | -     | -    | 20    |
| 153 | <i>Mus/Rattus</i>                                   | -                                | -      | -                             | -     | -    | 16    |
| 154 | <i>Rattus</i>                                       | -                                | -      | -                             | -     | -    | 8     |
| 157 | NN                                                  | -                                | -      | -                             | -     | -    | 12    |
| 159 | <i>Apodemus/Mus</i>                                 | -                                | -      | -                             | -     | -    | 8     |
| 161 | <i>Apodemus</i>                                     | -                                | -      | -                             | -     | -    | 4     |
| 166 | Laurasiatheria                                      | Murphy and Eizirik <sup>14</sup> | 87.2   | -                             | -     | -    | 87.2  |
| 167 | Eulipothyphla                                       | Douady and Douzery <sup>20</sup> | 80.5   | -                             | -     | -    | 80.5  |
| 168 | NN                                                  | -                                | -      | -                             | -     | -    | 67.1  |
| 169 | NN                                                  | -                                | -      | -                             | -     | -    | 53.7  |
| 171 | NN                                                  | -                                | -      | -                             | -     | -    | 40.25 |
| 173 | NN                                                  | -                                | -      | -                             | -     | -    | 26.8  |
| 174 | <i>Talpa occidentalis/europoea</i>                  | -                                | -      | -                             | -     | -    | 13.4  |
| 177 | NN                                                  | -                                | -      | -                             | -     | -    | 13.4  |
| 181 | Erinaceidae/Soricidae                               | Douady and Douzery <sup>20</sup> | 66.2   | -                             | -     | -    | 66.2  |

|     |                                             |                                  |        |                                     |      |      |       |
|-----|---------------------------------------------|----------------------------------|--------|-------------------------------------|------|------|-------|
| 182 | Erinaceus                                   | -                                | -      | -                                   | -    | -    | 33.1  |
| 185 | <i>Crocidura+Suncus/Sorex</i>               | -                                | -      | -                                   | -    | -    | 52.96 |
| 186 | <i>Crocidura/Suncus</i>                     | -                                | -      | -                                   | -    | -    | 39.72 |
| 188 | <i>Crocidura</i>                            | -                                | -      | -                                   | -    | -    | 26.48 |
| 189 | NN                                          | -                                | -      | -                                   | -    | -    | 13.24 |
| 193 | <i>Sorex/Cryptotis/Chimarrogale</i>         | -                                | -      | -                                   | -    | -    | 39.72 |
| 194 | NN                                          | -                                | -      | -                                   | -    | -    | 26.8  |
| 195 | <i>Sorex</i>                                | -                                | -      | -                                   | -    | -    | 13.4  |
| 199 | <i>Chimarrogale/Neomys</i>                  | -                                | -      | -                                   | -    | -    | 13.24 |
| 202 | Pegasoferae/Cetartiodactyla                 | Murphy and Eizirik <sup>14</sup> | 84.6   | -                                   | -    | -    | 84.6  |
| 203 | Pegasoferae (Chiroptera/Ferae)              | Murphy and Eizirik <sup>14</sup> | 84.2   | -                                   | -    | -    | 84.2  |
| 204 | Chiroptera                                  | Teeling <sup>21</sup>            | 62.00* | Bininda-Emonds et al. <sup>13</sup> | 74.9 | 0.83 | 62    |
| 205 | Pteropodidae+Rhinolophidae                  | Teeling <sup>21</sup>            | 57.5   | -                                   | -    | -    | 57.5  |
| 207 | Pteropodidae                                | -                                | -      | Bininda-Emonds et al. <sup>13</sup> | 27.3 | 0.83 | 22.6  |
| 210 | Vespertilionidae                            | -                                | -      | Bininda-Emonds et al. <sup>13</sup> | 56   | 0.83 | 46.4  |
| 212 | NN                                          | -                                | -      | Bininda-Emonds et al. <sup>13</sup> | 15.8 | 0.83 | 13.1  |
| 214 | <i>Myotis</i>                               | -                                | -      | Bininda-Emonds et al. <sup>13</sup> | 12.9 | 0.83 | 10.7  |
| 217 | Ferae (Carnivora/Pholidota( <i>Manis</i> )) | Murphy and Eizirik <sup>14</sup> | 79.8   | -                                   | -    | -    | 79.8  |
| 218 | Carnivora                                   | Eizirik and Murphy <sup>22</sup> | 52.9   | -                                   | -    | -    | 52.9  |
| 220 | Caniformia                                  | Eizirik and Murphy <sup>22</sup> | 44     | -                                   | -    | -    | 44    |
| 222 | <i>Phoca/Mustella</i>                       | Eizirik and Murphy <sup>22</sup> | 38     | -                                   | -    | -    | 38    |
| 225 | <i>Manis</i>                                | -                                | -      | -                                   | -    | -    | 19    |
| 228 | Cetartiodactyla                             | Gatesy <sup>23</sup>             | 67.30* | Bininda-Emonds et al. <sup>13</sup> | 74.1 | 0.91 | 67.3  |
| 230 | <i>Sus</i> +Cetacea/Ruminantia              | Gatesy <sup>23</sup>             | 63.5   | -                                   | -    | -    | 63.5  |
| 232 | Cetacea/Ruminantia                          | Gatesy <sup>23</sup>             | 59.1   | -                                   | -    | -    | 59.1  |
| 234 | Ruminantia (Capreolus/Bovidae)              | Gatesy <sup>23</sup>             | 27.8   | -                                   | -    | -    | 27.8  |
| 236 | Bovidae                                     | -                                | -      | Bininda-Emonds et al. <sup>13</sup> | 29.9 | 0.91 | 27.2  |
| 237 | Caprinae                                    | -                                | -      | Bininda-Emonds et al. <sup>13</sup> | 19.6 | 0.91 | 17.8  |

**Supplementary Table 2. Reconstructed ossification sequence of the hypothetical common ancestor of Mammalia and Sauropsida (non-mammalian amniotes) using squared-change parsimony.** Exact reconstructed value and 78% confidence interval (CI) values are given. Ossification sequence is scaled from 0 to 1. Values for orbitosphenoid and alisphenoid of sauropsid common ancestor are not available because of uncertain homologies of these bones.

| Number code | Bone           | Mammalian last common ancestor |              |              | Sauropsid last common ancestor |              |              |
|-------------|----------------|--------------------------------|--------------|--------------|--------------------------------|--------------|--------------|
|             |                | Reconstructed value            | Lower 78% CI | Upper 78% CI | Reconstructed value            | Lower 78% CI | Upper 78% CI |
| 1           | Premaxilla     | 0.27                           | -0.02        | 0.56         | 0.37                           | 0.12         | 0.63         |
| 2           | Maxilla        | 0.27                           | 0.05         | 0.48         | 0.30                           | 0.12         | 0.49         |
| 3           | Dentary        | 0.28                           | 0.10         | 0.45         | 0.29                           | 0.14         | 0.45         |
| 4           | Frontal        | 0.41                           | 0.10         | 0.72         | 0.49                           | 0.22         | 0.77         |
| 5           | Nasal          | 0.49                           | 0.22         | 0.75         | 0.52                           | 0.27         | 0.76         |
| 6           | Jugal          | 0.43                           | 0.13         | 0.74         | 0.38                           | 0.09         | 0.65         |
| 7           | Lacrima        | 0.67                           | 0.29         | 1.05         | 0.65                           | 0.27         | 1.04         |
| 8           | Parietal       | 0.45                           | 0.16         | 0.76         | 0.48                           | 0.22         | 0.83         |
| 9           | Squamosal      | 0.41                           | 0.11         | 0.76         | 0.38                           | 0.11         | 0.65         |
| 10          | Vomer          | 0.51                           | 0.14         | 0.89         | 0.54                           | 0.21         | 0.87         |
| 11          | Palatine       | 0.38                           | -infinity    | infinity     | 0.40                           | -infinity    | infinity     |
| 12          | Orbitosphenoid | 0.86                           | -infinity    | infinity     | -                              | -            | -            |
| 13          | Basisphenoid   | 0.73                           | 0.38         | 1.07         | 0.68                           | 0.38         | 0.99         |
| 14          | Pterygoid      | 0.42                           | 0.11         | 0.73         | 0.29                           | 0.02         | 0.56         |
| 15          | Alisphenoid    | 0.67                           | 0.31         | 1.04         | -                              | -            | -            |
| 16          | Basioccipital  | 0.66                           | 0.30         | 1.01         | 0.76                           | 0.29         | 1.16         |
| 17          | Supraoccipital | 0.67                           | 0.33         | 1.01         | 0.83                           | 0.53         | 1.13         |
| 18          | Exoccipital    | 0.57                           | 0.22         | 0.93         | 0.69                           | 0.38         | 1.00         |
| 19          | Ectotympanic   | 0.49                           | 0.21         | 0.81         | 0.40                           | 0.16         | 0.76         |
| 20          | Goniale        | 0.57                           | 0.25         | 0.91         | 0.53                           | 0.22         | 0.88         |
| 21          | Petrosal       | 0.98                           | 0.80         | 1.14         | 0.94                           | 0.78         | 1.09         |



**Supplementary Table 3. List of life history variables.**

| Species name                          | Body weight | Neonatal weight | Gestation length | Brain weight | EQ      | Reference                                                                                                    |
|---------------------------------------|-------------|-----------------|------------------|--------------|---------|--------------------------------------------------------------------------------------------------------------|
| <i>Tarsius tarsier</i>                | 125         | 28.5            | 191              | 3.6          | 0.2450  | Gursky <sup>24</sup> , Ross <sup>25</sup>                                                                    |
| <i>Nycticebus coucang</i>             | 885         | 51.24           | 192              | 13.6         | 0.1881  | Izard, et al. <sup>26</sup>                                                                                  |
| <i>Loris tardigradus</i>              | 322         |                 |                  | 5.9          | 0.1530  | Silcox, et al. <sup>27</sup> , Hansen <sup>28</sup>                                                          |
| <i>Otolemur crassicaudatus</i>        | 850         | 52              | 133              | 10.3         | 0.0805  | Newman and Hendrickx <sup>29</sup>                                                                           |
| <i>Macaca nemestrina</i>              | 8660        | 472             | 175              | 122          | 0.4020  | Marino <sup>30</sup> , Tokuda, et al. <sup>31</sup> , Ross <sup>25</sup>                                     |
| <i>Macaca fasciata</i>                | 9506        | 496             | 173              | 90.99        | 0.2444  | Barton <sup>32</sup> , Fooden and Aimi <sup>33</sup> , Ross <sup>25</sup>                                    |
| <i>Macaca fascicularis</i>            | 5060        | 345             | 164              | 70           | 0.3348  | Marino <sup>30</sup> , Jewett and Dukelow <sup>34</sup> , Ross <sup>25</sup>                                 |
| <i>Homo sapiens</i>                   | 75000       | 3375            | 266              | 1460         | 0.7806  | Hall <sup>35</sup> , Ross <sup>25</sup>                                                                      |
| <i>Galeopterus variegatus</i>         | 1300        | 35              | 60               | 7            | -0.2249 | Pirlot and Kamiya <sup>36</sup> , Macdonald <sup>37</sup>                                                    |
| <i>Tupaia belangeri</i>               | 170         | 18              | 45               | 3.2          | 0.0942  | Tsang and Collins <sup>38</sup> , Ferner, et al. <sup>39</sup>                                               |
| <i>Oryctolagus cuniculus</i>          | 1411        | 34              | 29               | 8.98         | -0.1433 | Gibb, et al. <sup>40</sup> , Swihart <sup>41</sup>                                                           |
| <i>Lepus sp.</i>                      | 1954        | 110             | 42               | 14.35        | -0.0452 | Swihart <sup>41</sup>                                                                                        |
| <i>Abrothrix longipilis</i>           | 66          | 3.5             | 23               |              |         | Merani and Lizarralde <sup>42</sup> , Antinuchi and Busch <sup>43</sup>                                      |
| <i>Mesocricetus auratus</i>           | 94          | 2.5             | 16               | 1.12         | -0.1684 | Barton <sup>32</sup> , Labov, et al. <sup>44</sup>                                                           |
| <i>Rattus norvegicus (albino)</i>     | 184         |                 |                  | 1.8          | -0.1818 | West and Kemper <sup>45</sup>                                                                                |
| <i>Rattus norvegicus (long-evans)</i> | 345         | 7.5             | 22               | 2.15         | -0.3078 | Troy-Harker and Wishaw <sup>46</sup> , Wisniewski, et al. <sup>47</sup> , Kalinichev, et al. <sup>48</sup> , |
| <i>Peromyscus melanophrys</i>         | 45          | 1.9             | 23               | 0.94         | -0.0072 | Kiltie <sup>49</sup> , Svihla <sup>50</sup>                                                                  |
| <i>Mus musculus</i>                   | 21          | 1.3             | 20               | 0.43         | -0.0976 | Laurie <sup>51</sup> , Meikle and Westberg <sup>52</sup>                                                     |
| <i>Cavia porcellus</i>                | 415         | 94              | 68               | 4.6          | -0.0373 | Laurien-Kehnen and Trillmich <sup>53</sup>                                                                   |
| <i>Erethizon dorsatum</i>             | 5397        | 504             | 213              | 24.6         | -0.1403 | Shadle <sup>54</sup>                                                                                         |
| <i>Octodon degu</i>                   | 140         | 14              | 90               |              |         | Mahoney, et al. <sup>55</sup> , Long and Ebensperger <sup>56</sup>                                           |
| <i>Myocastor coypus</i>               | 7052        | 207             | 133              |              |         | Gosling <sup>57</sup>                                                                                        |
| <i>Meriones unguiculatus</i>          | 57          | 2.8             | 25.6             | 1.13         | -0.0061 | Lesku, et al. <sup>58</sup> , McManus <sup>59</sup>                                                          |
| <i>Rhabdomys pumilio</i>              | 40          | 2.5             | 23               | 0.69         | -0.1009 | Brooks <sup>60</sup>                                                                                         |
| <i>Myodes glareolus</i>               | 18          | 1.8             | 18.5             | 0.52         | 0.0344  | Vihervaara, et al. <sup>61</sup> , Mappes, et al. <sup>62</sup>                                              |
| <i>Myodes rex</i>                     | 38          |                 | 18.5             |              |         | Kaneko, et al. <sup>63</sup>                                                                                 |
| <i>Apodemus speciosus</i>             | 48          | 2.4             | 20               | 0.54         | -0.2681 | Fujimaki <sup>64</sup> , Oh and Mori <sup>65</sup>                                                           |
| <i>Apodemus argenteus</i>             | 15          | 1.7             | 20               | 0.312        | -0.1302 | Koyama <sup>66</sup> , Koyama <sup>67</sup> , Fujimaki <sup>64</sup>                                         |
| <i>Microtus montebelli</i>            | 35          | 2.9             | 21.1             |              |         | Yoshinaga, et al. <sup>68</sup>                                                                              |
| <i>Jaculus jaculus</i>                | 55          | 2               | 25               | 1.8          | 0.2100  | McNab and Eisenberg <sup>69</sup> , Jordan, et al. <sup>70</sup> , Happold <sup>71</sup>                     |
| <i>Arvicola amphibius</i>             | 168         | 5               | 21               | 1.64         | -0.1928 | Bazhan, et al. <sup>72</sup>                                                                                 |
| <i>Xerus sp.</i>                      | 640         | 20              | 48               | 10.74        | 0.1908  | Skurski and Waterman <sup>73</sup>                                                                           |
| <i>Erinaceus europaea</i>             | 697         | 16              | 37               | 3.77         | -0.2917 | Symonds <sup>74</sup>                                                                                        |
| <i>Erinaceus amurensis</i>            | 600         |                 |                  |              |         | Japanese Ministry of the Environment <sup>75</sup>                                                           |
| <i>Mogera wogura</i>                  | 129         |                 | 40               |              |         | De Magalhaes and Costa <sup>76</sup>                                                                         |
| <i>Mogera insularis</i>               | 57          |                 |                  |              |         | Lin and Motokawa <sup>77</sup>                                                                               |
| <i>Condylura cristata</i>             | 50          | 1.5             | 45               | 1.37         | 0.1223  | Lesku, et al. <sup>58</sup> , Eadie and Hamilton <sup>78</sup>                                               |
| <i>Scapanus orarius</i>               | 70          | 5               | 35               | 2.02         | 0.1819  | Carraway, et al. <sup>79</sup>                                                                               |

|                                  |        |       |      |        |         |                                                                                         |
|----------------------------------|--------|-------|------|--------|---------|-----------------------------------------------------------------------------------------|
| <i>Talpa europaea</i>            | 81     | 3.5   | 31.5 | 1.69   | 0.0592  | Symonds <sup>74</sup>                                                                   |
| <i>Talpa occidentalis</i>        | 45     | 3     | 28   |        |         | Barrionuevo, et al. <sup>80</sup>                                                       |
| <i>Urotrichus talpoides</i>      | 19     |       |      |        |         | Ishii <sup>81</sup>                                                                     |
| <i>Cryptotis parva</i>           | 5      | 0.34  | 21.5 |        |         | Mock <sup>82</sup> , De Magalhaes and Costa <sup>76</sup>                               |
| <i>Suncus murinus</i>            | 36     | 2.7   | 30   |        |         | Dryden, et al. <sup>83</sup> , Lesku, et al. <sup>58</sup>                              |
| <i>Chimarrigale platycephala</i> | 45     | 1     | 22   | 0.9    | -0.0261 | This study, Furuta <sup>84</sup>                                                        |
| <i>Neomys fodiens</i>            | 14     | 1     | 22   |        |         | McNab and Eisenberg <sup>69</sup> , Stephenson and Racey <sup>85</sup>                  |
| <i>Sorex araneus</i>             | 8      | 0.45  | 22   | 0.25   | -0.0019 | Symonds <sup>74</sup>                                                                   |
| <i>Sorex unguiculatus</i>        | 10     | 0.6   | 24   |        |         | Inoue <sup>86</sup> , Nesterenko and Ohdachi <sup>87</sup>                              |
| <i>Crociodura russula</i>        | 10     | 0.88  | 29.6 | 0.19   | -0.2110 | Symonds <sup>74</sup>                                                                   |
| <i>Crociodura attenuata</i>      | 10     | 1.5   | 29   |        |         | This study, Fang, et al. <sup>88</sup>                                                  |
| <i>Crociodura dsinezumi</i>      | 10     |       | 29   | 0.19   | -0.1908 | Ohno, et al. <sup>89</sup>                                                              |
| <i>Crociodura watasei</i>        | 6      |       | 29   |        |         | This study                                                                              |
| <i>Rousettus aegyptiacus</i>     | 130    | 12    | 120  | 2.6    | 0.0910  | Giannini, et al. <sup>90</sup> , Kurta and Kunz <sup>91</sup>                           |
| <i>Myotis myotis</i>             | 25     | 5.9   | 65   | 0.48   | -0.1086 | Lesku, et al. <sup>58</sup> , De Magalhaes and Costa <sup>76</sup>                      |
| <i>Kerivoula sp.</i>             | 4      |       |      |        |         | This study                                                                              |
| <i>Myotis sp.</i>                | 7      | 2     | 60   | 0.23   | -0.0157 | De Magalhaes and Costa <sup>76</sup> , Eisenberg and Wilson <sup>92</sup>               |
| <i>Rhinolophus thomasi</i>       |        |       |      |        |         |                                                                                         |
| <i>Cynopterus sphinx</i>         |        | 11    | 120  |        |         | De Magalhaes and Costa <sup>76</sup>                                                    |
| <i>Hesperoptenus blanfordi</i>   | 7      |       |      |        |         | This study                                                                              |
| <i>Hipposideros larvatus</i>     | 14     | 2.34  | 158  | 0.32   | -0.0948 | De Magalhaes and Costa <sup>76</sup>                                                    |
| <i>Canis familiaris</i>          | 22680  | 450   | 63   | 119    | 0.0792  | De Magalhaes and Costa <sup>76</sup>                                                    |
| <i>Felis catus</i>               | 5400   | 97.5  | 65   | 30     | -0.0542 | Burton <sup>93</sup> , De Magalhaes and Costa <sup>76</sup>                             |
| <i>Mustela sp.</i>               | 179    | 2.6   | 36   | 4.6    | 0.2351  | De Magalhaes and Costa <sup>76</sup>                                                    |
| <i>Eumetopias jubatus</i>        | 181000 | 5900  | 237  | 367    | -0.1046 | York and Scheffer <sup>94</sup> , Trites <sup>95</sup>                                  |
| <i>Phoca sp.</i>                 |        |       |      |        |         |                                                                                         |
| <i>Sus scrofa</i>                | 84528  | 960   | 115  | 185.35 | -0.1545 | Burton <sup>93</sup> , De Magalhaes and Costa <sup>76</sup>                             |
| <i>Ovis aries</i>                | 32950  | 2370  | 146  | 125.90 | -0.0173 | De Magalhaes and Costa <sup>76</sup>                                                    |
| <i>Bos taurus</i>                | 591562 | 26000 | 280  | 456.04 | -0.3939 | Camargo, et al. <sup>96</sup> , De Magalhaes and Costa <sup>76</sup>                    |
| <i>Capra hircus</i>              | 37068  | 2250  | 155  | 102.57 | -0.1445 | Burton <sup>93</sup> , De Magalhaes and Costa <sup>76</sup>                             |
| <i>Dama dama</i>                 | 56234  | 4500  | 233  | 220.80 | 0.0535  | Burton <sup>93</sup> , De Magalhaes and Costa <sup>76</sup>                             |
| <i>Capreolus capreolus</i>       | 25119  | 1010  | 153  | 64.42  | -0.2204 | Burton <sup>93</sup> , De Magalhaes and Costa <sup>76</sup>                             |
| <i>Camelus dromedarius</i>       | 400000 | 760   |      |        | -0.0453 | McNab and Eisenberg <sup>69</sup>                                                       |
| <i>Manis javanica</i>            | 3500   | 87    | 60   | 11     | -0.3495 | McNab and Eisenberg <sup>69</sup> , Lim and Ng <sup>97</sup>                            |
| <i>Manis crassicaudata</i>       | 15910  | 235   | 67   |        |         | Heusner <sup>98</sup> , De Magalhaes and Costa <sup>76</sup> , Lim and Ng <sup>97</sup> |
| <i>Stenella attenuata</i>        | 65615  | 10000 | 345  | 779.83 | 0.5515  | Burton <sup>93</sup> , De Magalhaes and Costa <sup>76</sup>                             |
| <i>Dasyopus novemcinctus</i>     | 3401   | 66    | 133  | 7.5    | -0.5065 | De Magalhaes and Costa <sup>76</sup>                                                    |
| <i>Dasyopus hybridus</i>         | 1900   | 30    | 120  |        |         | Galfindez, et al. <sup>99</sup> , Superina, et al. <sup>100</sup>                       |
| <i>Bradyopus variegatus</i>      |        | 340   | 180  |        |         | Taube, et al. <sup>101</sup> , Haysen <sup>102</sup>                                    |
| <i>Cyclopes didactylus</i>       | 400    |       | 135  | 4.29   | -0.0557 | McNab and Eisenberg <sup>69</sup> , De Magalhaes and Costa <sup>76</sup>                |
| <i>Tamandua tetradactyla</i>     | 3692   | 380   | 160  | 25     | -0.0102 | De Magalhaes and Costa <sup>76</sup> , San Diego Zoo <sup>103</sup>                     |

|                                  |         |        |      |       |         |                                                                                                              |
|----------------------------------|---------|--------|------|-------|---------|--------------------------------------------------------------------------------------------------------------|
| <i>Trichechus manatus</i>        | 322000  | 32000  | 335  |       |         | De Magalhaes and Costa <sup>76</sup>                                                                         |
| <i>Dugong dugong</i>             | 360000  | 27500  | 374  |       |         | De Magalhaes and Costa <sup>76</sup>                                                                         |
| <i>Loxodonta africana</i>        | 3505000 | 105000 | 670  | 4420  | 0.0161  | De Magalhaes and Costa <sup>76</sup>                                                                         |
| <i>Echinops telfairi</i>         |         | 50     | 55   |       |         | De Magalhaes and Costa <sup>76</sup>                                                                         |
| <i>Tenrec ecaudatus</i>          |         | 25     | 59.3 |       |         | Lesku, et al. <sup>58</sup> , Stephenson and Racey <sup>85</sup>                                             |
| <i>Procvia capensis</i>          | 2275    |        |      |       |         | Welker and Carlson <sup>104</sup>                                                                            |
| <i>Heterohyrax brucei</i>        | 2457    | 225    | 229  |       |         | De Magalhaes and Costa <sup>76</sup>                                                                         |
| <i>Elephantulus rozeti</i>       |         | 10     | 55   |       |         | Tripp <sup>105</sup>                                                                                         |
| <i>Macrosclides proboscideus</i> | 40      | 7      | 19   |       |         | De Magalhaes and Costa <sup>76</sup>                                                                         |
| <i>Eremitalpa granti</i>         | 22.7    |        | 35   |       |         | Stuart and Stuart <sup>106</sup>                                                                             |
| <i>Orycteropus afer</i>          | 60000   | 1800   | 225  |       |         | De Magalhaes and Costa <sup>76</sup>                                                                         |
| <i>Monodelphis domestica</i>     | 103     | 0.1    | 15   | 1     | -0.2486 | Watson, et al. <sup>107</sup> , De Magalhaes and Costa <sup>76</sup>                                         |
| <i>Caluromys philander</i>       | 277     | 0.2    | 24   | 3.626 | -0.0097 | De Magalhaes and Costa <sup>76</sup>                                                                         |
| <i>Didelphis albiventris</i>     | 1500    | 0.12   | 12   |       |         | Nogueira 1988. Tyndale-Biscoe and Mackenzie 1976 Santos et al. 2003                                          |
| <i>Didelphis virginiana</i>      |         | 0.147  | 12.6 |       |         | De Magalhaes and Costa <sup>76</sup> , Lesku, et al. <sup>58</sup>                                           |
| <i>Perameles nasuta</i>          |         | 0.245  | 12   |       |         | De Magalhaes and Costa <sup>76</sup>                                                                         |
| <i>Dasyurus viverrinus</i>       | 813     | 0.013  | 19   | 5.52  | -0.1760 | Smith <sup>108</sup>                                                                                         |
| <i>Macropus eugenii</i>          | 4425    | 0.37   | 11   | 24.55 | -0.0768 | Gemmell and Selwood <sup>109</sup> , Smith <sup>108</sup>                                                    |
| <i>Sminthopsis macroura</i>      | 17      | 0.01   | 12   | 0.41  | -0.0475 | De Magalhaes and Costa <sup>76</sup>                                                                         |
| <i>Trichosurus vulpecula</i>     | 1620    | 0.2    | 18   | 11.4  | -0.0844 | Smith <sup>108</sup>                                                                                         |
| <i>Isodon macrourus</i>          | 822     | 0.188  | 12   | 4.42  | -0.2761 | De Magalhaes and Costa <sup>76</sup> , Weisbecker and Goswami <sup>110</sup>                                 |
| <i>Ornithorhynchus anatinus</i>  | 1200    | 0.5    | 37   | 10    | -0.0441 | Grant and Temple-Smith <sup>111</sup> , McNab and Eisenberg <sup>69</sup> *gestation + incubation.           |
| <i>Tachyglossus aculeatus</i>    | 2544    | 0.303  | 34   | 19    | -0.0088 | McNab and Eisenberg <sup>69</sup> , Rismiller and McKelvey <sup>112-140</sup> *gestation + incubation.       |
| <i>Dromaius novaehollandiae</i>  | 38000   |        |      | 28.09 | -1.0858 | Corfield, et al. <sup>114</sup> , Blakers, et al. <sup>115</sup>                                             |
| <i>Rhea americana</i>            | 20000   |        |      | 22.5  | -1.0289 | Mlikovsky <sup>116</sup>                                                                                     |
| <i>Struthio camelus</i>          | 80000   |        |      | 41.9  | -1.0900 | Mlikovsky <sup>116</sup>                                                                                     |
| <i>Eudromia elegans</i>          |         |        |      |       |         |                                                                                                              |
| <i>Meleagris gallopavo</i>       |         |        |      |       |         |                                                                                                              |
| <i>Gallus gallus</i>             | 2580    | 46.1   | 21   | 3.6   | -1.3356 | Burton <sup>93</sup> , Uni, et al. <sup>117</sup> , University of Michigan, Museum of Zoology <sup>118</sup> |
| <i>Coturnix coturnix</i>         | 186     | 8.2    | 18   | 0.49  | -1.5732 | Bashir and Javed <sup>119</sup> , Tserveni-Gousi <sup>120</sup> , Woodard, et al. <sup>121</sup>             |
| <i>Anas platyrhynchos</i>        | 1100    |        |      | 6.2   | -0.8959 | Mlikovsky <sup>116</sup>                                                                                     |
| <i>Cairina moschata</i>          |         |        |      |       |         |                                                                                                              |
| <i>Somateria mollissima</i>      |         |        |      |       |         |                                                                                                              |
| <i>Liopholis whitii</i>          |         |        |      |       |         |                                                                                                              |
| <i>Lerista bougainvillii</i>     |         |        |      |       |         |                                                                                                              |
| <i>Hemiergis peronii</i>         |         |        |      |       |         |                                                                                                              |
| <i>Saiphos equalis</i>           |         |        |      |       |         |                                                                                                              |
| <i>Lacerta agilis</i>            | 10      | 5.13   | 53   | 0.076 | -1.6913 | Jensen <sup>122</sup> , Amat, et al. <sup>123</sup> , Ekner, et al. <sup>124</sup>                           |
| <i>Ptychoglossus bicolor</i>     |         |        |      |       |         |                                                                                                              |
| <i>Tupinambis merianae</i>       | 97      | 15     |      |       |         |                                                                                                              |
| <i>Zootoca vivipara</i>          |         |        |      |       |         |                                                                                                              |

|                                    |       |      |    |      |         |                                                                                                                      |
|------------------------------------|-------|------|----|------|---------|----------------------------------------------------------------------------------------------------------------------|
| <i>Polychrus acutirostris</i>      | 20    | 1.3  |    |      |         | Vitt and Lacher <sup>125</sup>                                                                                       |
| <i>Caiman yacare</i>               |       |      |    |      |         |                                                                                                                      |
| <i>Alligator mississippiensis</i>  | 67131 | 67.6 | 64 | 6.58 | -1.8521 | Ferguson <sup>126</sup> , Ross <sup>127</sup>                                                                        |
| <i>Python sebae</i>                |       | 105  | 87 |      |         | Branch and Patterson <sup>128</sup> , Branch and Erasmus <sup>129</sup> , Ott and Secor <sup>130</sup>               |
| <i>Pantherophis alleghaniensis</i> |       |      |    |      |         |                                                                                                                      |
| <i>Acrochordus granulatus</i>      |       |      |    |      |         |                                                                                                                      |
| <i>Vipera aspis</i>                |       |      |    |      |         |                                                                                                                      |
| <i>Agkistrodon piscivorus</i>      |       |      |    |      |         |                                                                                                                      |
| <i>Bothropoides jararaca</i>       |       |      |    |      |         |                                                                                                                      |
| <i>Naja kaouthia</i>               |       |      |    |      |         |                                                                                                                      |
| <i>Boaedon fuliginosus</i>         | 202   | 5.5  | 60 |      |         | Boback, et al. <sup>131</sup>                                                                                        |
| <i>Natrix taxispilota</i>          | 336   |      |    |      |         | Mills <sup>132</sup>                                                                                                 |
| <i>Emydura subglobosa</i>          | 500   |      |    |      |         | University of Michigan, Museum of Zoology <sup>118</sup>                                                             |
| <i>Chelydra serpentina</i>         | 4000  | 10.8 | 60 | 0.98 | -2.0054 | Yntema <sup>133</sup> , Burghardt and Hess <sup>134</sup> , University of Michigan, Museum of Zoology <sup>118</sup> |

**Supplementary Table 4. Standard deviations and coefficients of variation of ossification timing of cranial elements in mammals.** Species with more than three ranks were included in the analysis.

| Number Code | Bone           | Standard deviation | CV   |
|-------------|----------------|--------------------|------|
| 1           | Premaxilla     | 0.16               | 1.79 |
| 2           | Maxilla        | 0.09               | 1.98 |
| 3           | Dentary        | 0.06               | 3.44 |
| 4           | Frontal        | 0.16               | 1.04 |
| 5           | Nasal          | 0.26               | 0.64 |
| 6           | Jugal          | 0.24               | 0.86 |
| 7           | Lacrimal       | 0.30               | 0.62 |
| 8           | Parietal       | 0.23               | 0.97 |
| 9           | Squamosal      | 0.21               | 0.78 |
| 10          | Vomer          | 0.27               | 0.89 |
| 11          | Palatine       | 0.17               | 0.84 |
| 12          | Orbitosphenoid | 0.17               | 0.20 |
| 13          | Basisphenoid   | 0.23               | 0.37 |
| 14          | Pterygoid      | 0.21               | 0.83 |
| 15          | Alisphenoid    | 0.27               | 0.43 |
| 16          | Basioccipital  | 0.25               | 0.59 |
| 17          | Supraoccipital | 0.29               | 0.61 |
| 18          | Exoccipital    | 0.25               | 0.60 |
| 19          | Ectotympanic   | 0.25               | 0.53 |
| 20          | Goniale        | 0.28               | 0.45 |
| 21          | Petrosal       | 0.08               | 0.08 |



## Supplementary references

1. Shedlock, A. M. & Edwards, S. V. in *The TimeTree of Life* (eds Hedges, S. B. & Kumar, S.) 375-379 (Oxford University Press, 2009).
2. van Tuinen, M. in *The TimeTree of Life* (eds Hedges, S. B. & Kumar, S.) 409-411 (Oxford University Press, 2009).
3. Pereira, S. L. & Baker, A. J. in *The TimeTree of Life* (eds Hedges, S. B. & Kumar, S.) 415-418 (Oxford University Press, 2009).
4. Slack, K. E. *Avian phylogeny and divergence times based on mitogenomic sequence* PhD thesis. Massey University (2012).
5. Baker, A. J. & Pereira, S. L. in *The TimeTree of Life* (eds Hedges, S. B. & Kumar, S.) 412-414 (Oxford University Press, 2009).
6. Brochu, C. A. in *The TimeTree of Life* (eds Hedges, S. B. & Kumar, S.) 402-406 (Oxford University Press, 2009).
7. Shaffer, H. B. in *The TimeTree of Life* (eds Hedges, S. B. & Kumar, S.) 398-401 (Oxford University Press, 2009).
8. Hedges, S. B. & Vidal, N. in *The TimeTree of Life* (eds Hedges, S. B. & Kumar, S.) 383-389 (Oxford University Press, 2009).
9. Vidal, N. & Hedges, S. B. The phylogeny of squamate reptiles (lizards, snakes, and amphisbaenians) inferred from nine nuclear protein-coding genes. *C. R. Biol.* **328**, 1000-1008 (2005).
10. Vidal, N., Rage, J.-C., Coulloux, A. & Hedges, S. B. in *The TimeTree of Life* (eds Hedges, S. B. & Kumar, S.) 390-397 (Oxford University Press, 2009).
11. Madsen, O. in *The TimeTree of Life* (eds Hedges, S. B. & Kumar, S.) 459-461 (Oxford University Press, 2009).
12. Springer, M. S., Krajewski, C. W. & Meredith, R. W. in *The TimeTree of Life* (eds Hedges, S. B. & Kumar, S.) 466-470 (Oxford University Press, 2009).
13. Bininda-Emonds, O. R. P. *et al.* The delayed rise of present-day mammals. *Nature* **446**, 507-512 (2007).
14. Murphy, W. J. & Eizirik, E. in *The TimeTree of Life* (eds Hedges, S. B. & Kumar, S.) 471-474 (Oxford University Press, 2009).
15. Poux, C., Madsen, O., Glos, J., de Jong, W. W. & Vences, M. Molecular phylogeny and divergence times of Malagasy tenrecs: influence of data partitioning and taxon sampling on dating analyses. *BMC Evol. Biol.* **8**, 102 (2008).
16. Dulcic, F. & P, D. E. J. in *The TimeTree of Life* (eds Hedges, S. B. & Kumar, S.) 475-478 (Oxford University Press, 2009).
17. Steiper, M. E. & Young, N. M. in *The TimeTree of Life* (eds Hedges, S. B. & Kumar, S.) 482-486 (Oxford University Press, 2009).
18. Perelman, P. *et al.* A molecular phylogeny of living primates. *PLoS Genet.* **7**, e1001342 (2011).
19. Honeycutt, R. L. in *The TimeTree of Life* (eds Hedges, S. B. & Kumar, S.) 490-494 (Oxford University Press, 2009).
20. Douady, C. J. & Douzery, E. J. P. in *The TimeTree of Life* (eds Hedges, S. B. & Kumar, S.) 495-498 (Oxford University Press, 2009).
21. Teeling, E. C. in *The TimeTree of Life* (eds Hedges, S. B. & Kumar, S.) 499-503 (Oxford University Press, 2009).
22. Eizirik, E. & Murphy, W. J. in *The TimeTree of Life* (eds Hedges, S. B. & Kumar, S.) 504-507 (Oxford University Press, 2009).
23. Gatesy, J. in *The TimeTree of Life* (eds Hedges, S. B. & Kumar, S.) 511-515 (Oxford University Press, 2009).
24. Gursky, S. Allocare in a nocturnal primate: Data on the spectral tarsier, *Tarsius spectrum*. *Folia Primatol.* **71**, 39-54 (2000).
25. Ross, C. Life history patterns of New World monkeys. *Int. J. Primatol.* **12**, 481-502 (1991).
26. Izard, M. K., Weisenseel, K. & Ange, R. Reproduction in the slow loris (*Nycticebus coucang*). *Am. J. Primatol.* **16**, 331-339 (2005).
27. Silcox, M. T., Benham, A. E. & Bloch, J. I. Endocasts of *Microsyops* (Microsyopidae, Primates) and the evolution of the brain in primitive primates. *J. Hum. Evol.* **58**, 505-521 (2010).
28. Hansen, T. F. The Evolution of Genetic Architecture. *Annu. Rev. Ecol. Evol. Syst.* **37** (2006).

29. Newman, L. & Hendrickx, A. Fetal development in the normal thick-tailed bushbaby (*Galago crassicaudatus panganiensis*). *Am. J. Primatol.* **6**, 337-355 (1984).
30. Marino, L. A comparison of encephalization between odontocete cetaceans and anthropoid primates. *Brain Behav. Evol.* **51**, 230-238 (1998).
31. Tokuda, K., Simons, R. C. & Jensen, G. D. Sexual behavior in a captive group of pigtailed monkeys (*Macaca nemestrina*). *Primates* **9**, 283-294 (1968).
32. Barton, R. A. Binocularity and brain evolution in primates. *Proc. Nat. Acad. Sci. U.S.A.* **101**, 10113-10115 (2004).
33. Fooden, J. & Aimi, M. Birth-season variation in Japanese macaques, *Macaca fuscata*. *Primates* **44**, 109-117 (2003).
34. Jewett, D. & Dukelow, W. R. Cyclicity and gestation length of *Macaca fascicularis*. *Primates* **13**, 327-332 (1972).
35. Hall, M. H. Definitions used in relation to gestational age. *Paediatr. Perinat. Epidemiol.* **4**, 123-128 (1990).
36. Pirlot, P. & Kamiya, T. Relative size of brain and brain components in three gliding placentals (Dermoptera: Rodentia). *Can. J. Zool.* **60**, 565-572 (1982).
37. Macdonald, D. W. *The Encyclopedia of Mammals* (Oxford University Press, 2009).
38. Tsang, W. & Collins, P. Techniques for hand-rearing tree-shrews (*Tupaia belangeri*) from birth. *Zoo Biol.* **4**, 23-31 (1985).
39. Ferner, K., Zeller, U., Schmelting, B. & Fuchs, E. Ontogenetic and lung development in *Tupaia belangeri* during the early postnatal period. *Mamm. Biol.* **75**, 95-105 (2010).
40. Gibb, J. A., Chapman, J. & Flux, J. in *Rabbits, Hares, and Pikas: Status Survey and Conservation Action Plans* (eds Chapman, J. A. & Flux, J. E. C.) 116-120 (IUCN, 1990).
41. Swihart, R. K. Body size, breeding season length, and life history tactics of lagomorphs. *Oikos* **43**, 282-290 (1984).
42. Merani, M. S. & Lizarralde, M. S. *Akodon molinae* (Rodentia Cricetidae), a new laboratory animal: breeding, management and reproductive performance. *Lab. Anim.* **14**, 129-131 (1980).
43. Antinuchi, C. D. & Busch, C. Reproductive energetics and thermoregulatory status of nestlings in pampas mice *Akodon azarae* (Rodentia: Sigmodontinae). *Physiol. Biochem. Zool.* **74**, 319-324 (2001).
44. Labov, J. B., William Huck, U., Vaswani, P. & Lisk, R. D. Sex ratio manipulation and decreased growth of male offspring of undernourished golden hamsters (*Mesocricetus auratus*). *Behav. Ecol. Sociobiol.* **18**, 241-249 (1986).
45. West, C. D. & Kemper, T. L. The effect of a low protein diet on the anatomical development of the rat brain. *Brain Res.* **107**, 221-237 (1976).
46. Troy-Harker, K. & Wishaw, I. Q. Place and matching-to-place spatial learning affected by rat inbreeding (Dark-Agouti, Fischer 344) and albinism (Wistar, Sprague-Dawley) but not domestication (wild rat vs. Long-Evans, Fischer-Norway). *Behav. Brain Res.* **134**, 467-477 (2002).
47. Wisniewski, A. B., Klein, S. L., Lakshmanan, Y. & Gearhart, J. P. Exposure to genistein during gestation and lactation demasculinizes the reproductive system in rats. *J. Urol.* **169**, 1582-1586 (2003).
48. Kalinichev, M., Easterling, K. W., Plotsky, P. M. & Holtzman, S. G. Long-lasting changes in stress-induced corticosterone response and anxiety-like behaviors as a consequence of neonatal maternal separation in Long-Evans rats. *Pharmacol. Biochem. Behav.* **73**, 131-140 (2002).
49. Kiltie, R. A. Intraspecific variation in the mammalian gestation period. *J. Mammal.* **63**, 646-652 (1982).
50. Svihla, A. *A comparative life history study of the mice of the genus Peromyscus* (University of Michigan Press, 1932).
51. Laurie, E. The reproduction of the house-mouse (*Mus musculus*) living in different environments. *Proc. R. Soc. Lond., B, Biol. Sci.* **133**, 248-281 (1946).
52. Meikle, D. & Westberg, M. Maternal nutrition and reproduction of daughters in wild house mice (*Mus musculus*). *Reproduction* **122**, 437-442 (2001).
53. Laurien-Kehnen, C. & Trillmich, F. Maternal food restriction delays weaning in the guinea pig, *Cavia porcellus*. *Anim. Behav.* **68**, 303-312 (2004).
54. Shadle, A. R. Gestation period in the porcupine, *Erethizon dorsatum dorsatum*. *J. Mammal.* **29**, 162-164 (1948).
55. Mahoney, M. M., Rossi, B. V., Hagenauer, M. H. & Lee, T. M. Characterization of the estrous cycle in *Octodon degus*. *Biol. Reprod.* **84**, 664-671 (2011).

56. Long, C. & Ebensperger, L. Pup growth rates and breeding female weight changes in two populations of captive bred degus (*Octodon degus*), a precocial caviomorph rodent. *Reprod. Domest. Anim.* **45**, 975-982 (2010).
57. Gosling, L. Selective abortion of entire litters in the coypu: adaptive control of offspring production in relation to quality and sex. *Am. Nat.* **127**, 772-795 (1986).
58. Lesku, J. A., Roth, T. C., Rattenborg, N. C., Amlaner, C. J. & Lima, S. L. Phylogenetics and the correlates of mammalian sleep: a reappraisal. *Sleep Med. Rev.* **12**, 229-244 (2008).
59. McManus, J. J. Early postnatal growth and the development of temperature regulation in the Mongolian gerbil, *Meriones unguiculatus*. *J. Mammal.* **52**, 782-792 (1971).
60. Brooks, P. Aspects of the reproduction, growth and development of the four-striped field mouse, *Rhabdomys pumilio* (Sparrman, 1784). *Mammalia* **46**, 53-64 (1982).
61. Vihervaara, H., Sundell, J. & Ylönen, H. Is mating alone enough to inhibit infanticide in male bank voles? *Ethology* **116**, 888-894 (2010).
62. Mappes, T. *et al.* Island selection on mammalian life-histories: genetic differentiation in offspring size. *BMC Evol. Biol.* **8**, 296 (2008).
63. Kaneko, Y., Nakata, K., Saitoh, T., Stenseth, N. C. & Bjørnstad, O. N. The biology of the vole *Clethrionomys rufocanus*: a review. *Res. Popul. Ecol.* **40**, 21-37 (1998).
64. Fujimaki, Y. Japanese Mammals (9) Rodentia, *Apodemus*. *Mammalian Science (Honyurui Kagaku)* **10**, 1-11 (1970).
65. Oh, H. S. & Mori, T. Growth, development and reproduction in captive of the large Japanese field mouse, *Apodemus speciosus* (Rodentia, Muridae). *Journal of the Faculty of Agriculture, Kyushu University* **42**, 397-408 (1998).
66. Koyama, S. On the growth and development of *Apodemus argenteus* under laboratory conditions. *Mammalian Science (Honyurui Kagaku)* **33**, 109-122 (1994).
67. Koyama, S. Reproductive activity of the Japanese long-tailed field mouse *Apodemus argenteus* under laboratory conditions. *J. Mammal. Soc. Jp.* **20**, 117-124 (1995).
68. Yoshinaga, Y., Okayama, T., Ohno, W. & Shiraiishi, S. Growth, development, and reproductive patterns in the Japanese field vole, *Microtus montebelli*. *J. Mammal.* **78**, 830-838 (1997).
69. McNab, B. K. & Eisenberg, J. F. Brain size and its relation to the rate of metabolism in mammals. *Am. Nat.* **133**, 157-167 (1989).
70. Jordan, B., Vercammen, P. & Cooper, K. L. Husbandry and breeding of the lesser Egyptian Jerboa, *Jaculus jaculus*. *Cold Spring Harb. Protoc.* **2011**, 1457-1461 (2011).
71. Happold, D. Reproduction and development of the Sudanese jerboa, *Jaculus jaculus butleri* (Rodentia, Dipodidae). *J. Zool.* **162**, 505-515 (1970).
72. Bazhan, N. M., Makarova, E. N. & Yakovleva, T. V. Deprivation of food during pregnancy and reproduction in the water vole (*Arvicola terrestris*). *J. Mammal.* **77**, 1078-1084 (1996).
73. Skurski, D. A. & Waterman, J. M. *Xerus inauris*. *Mammalian Species* **781**, 1-4 (2005).
74. Symonds, M. R. E. Life histories of the Insectivora: the role of phylogeny, metabolism and sex differences. *J. Zool.* **249**, 315-337 (2006).
75. Eble, G. J. in *Phenotypic Integration Studying the Ecology and Evolution of Complex Phenotypes* (eds Pigliucci, M. & Preston, K.) 253-273 (Oxford University Press, 2003).
76. De Magalhaes, J. & Costa, J. A database of vertebrate longevity records and their relation to other life-history traits. *J. Evol. Biol.* **22**, 1770-1774 (2009).
77. Lin, L. K. & Motokawa, M. *Mammals of Taiwan. Vol. 1. Soricomorpha* (Tsunghai University Press, 2010).
78. Eadie, W. R. & Hamilton, W. Notes on reproduction in the star-nosed mole. *J. Mammal.* **37**, 223-231 (1956).
79. Carraway, L. N., Alexander, L. F. & Verts, B. *Scapanus townsendii*. *Mammalian Species* **434**, 1-7 (1993).
80. Barrionuevo, F. J., Zurita, F., Burgos, M. & Jiménez, R. Developmental stages and growth rate of the mole *Talpa occidentalis* (Insectivora, Mammalia). *J. Mammal.* **85**, 120-125 (2004).
81. Ishii, N. Reproductive activity of the Japanese shrew-mole, *Urotrichus talpoides* Temminck. *J. Mammal. Soc. Jp.* **9**, 25-36 (1982).
82. Mock, O. The least shrew (*Cryptotis parva*) as a laboratory animal. *Lab. Anim. Sci.* **32**, 177 (1982).
83. Dryden, G. L., Gebczynski, M. & Douglas, E. Oxygen consumption by nursing and adult musk shrews. *Acta theriol* **19**, 453-461 (1974).

84. Furuta, Y. Reproduction and measurements of *Chimarrogale platycephala* from western Hyogo (Ichinomiya-cho and Ooya-cho). *Kagawa Biology (Kagawa Seibutsu)* **31**, 45-58 (2004).
85. Stephenson, P. & Racey, P. Resting metabolic rate and reproduction in the Insectivora. *Comp. Biochem. Physiol. A Physiol.* **112**, 215-223 (1995).
86. Inoue, T. Sex difference in spatial distribution of the big-clawed shrew *Sorex unguiculatus*. *Acta Theriologica* **36**, 229-237 (1991).
87. Nesterenko, V. & Ohdachi, S. D. Postnatal growth and development in *Sorex unguiculatus*. *Mammal Study* **26**, 145-148 (2001).
88. Fang, Y. P., Lee, L. L., Yew, F. H. & Yu, H. T. Systematics of white-toothed shrews (*Crocidura*) (Mammalia: Insectivora: Soricidae) of Taiwan: Karyological and morphological studies. *J. Zool.* **242**, 151-166 (1997).
89. Ohno, K. *et al.* The domestication of *Crocidura dsinezumi* as a new laboratory animal. *Experimental Animal (Jikken Dobutsu)* **41**, 449-454 (1992).
90. Giannini, N., Goswami, A. & Sánchez-Villagra, M. R. Development of integumentary structures in *Rousettus amplexicaudatus* (Mammalia: Chiroptera: Pteropodidae) during late-embryonic and fetal stages. *J. Mammal.* **87**, 993-1001 (2006).
91. Kurta, A. & Kunz, T. H. Size of bats at birth and maternal investment during pregnancy. *Symp. Zool. Soc. Lond.* **57**, 79-106 (1987).
92. Eisenberg, J. F. & Wilson, D. E. Relative brain size and feeding strategies in the Chiroptera. *Evolution* **32**, 740-751 (1978).
93. Burton, R. F. The scaling of eye size in adult birds: relationship to brain, head and body sizes. *Vis. Res.* **48**, 2345-2351 (2008).
94. York, A. E. & Scheffer, V. B. Timing of implantation in the northern fur seal, *Callorhinus ursinus*. *J. Mammal.* **78**, 675-683 (1997).
95. Trites, A. W. Fetal growth of northern fur seals: life-history strategy and sources of variation. *Can. J. Zool.* **69**, 2608-2617 (1991).
96. Camargo, L. S. A. *et al.* Gestation length, birth weight and offspring gender ratio of *in vitro*-produced Gyr (*Bos indicus*) cattle embryos. *Anim. Reprod. Sci.* **120**, 10-15 (2010).
97. Lim, N. T. L. & Ng, P. K. L. Home range, activity cycle and natal den usage of a female Sunda pangolin *Manis javanica* (Mammalia: Pholidota) in Singapore. *Endangered Species Research* **3**, 1-8 (2007).
98. Heusner, A. A. Size and power in mammals. *J. Exp. Biol.* **160**, 25-54 (1991).
99. Galíndez, E. J., Codón, S. M. & Casanave, E. B. Spleen of *Dasyopus hybridus* (Mammalia, Dasypodidae): A light and electron microscopic study. *Anat. Rec.* **258**, 286-291 (2000).
100. Superina, M., Miranda, F. R. & Abba, A. A. The 2009/2010 Armadillo red list assessment. *Edentata* **11**, 135-184 (2010).
101. Taube, E., Keravec, J., Vié, J. C. & Duplantier, J. M. Reproductive biology and postnatal development in sloths, *Bradypus* and *Choloepus*: review with original data from the field (French Guiana) and from captivity. *Mamm. Rev.* **31**, 173-188 (2001).
102. Hayssen, V. *Bradypus variegatus* (Pilosa: Bradypodidae). *Mammalian Species* **42**, 19-32 (2010).
103. Emerson, S. B. & Hastings, P. A. Morphological correlations in evolution: consequences for phylogenetic analysis. *Quart. Rev. Biol.* **73**, 141-162 (1998).
104. Welker, W. & Carlson, M. Somatic sensory cortex of hyrax (*Procavia*). *Brain Behav. Evol.* **13**, 294-301 (2008).
105. Tripp, H. Capture, laboratory care and breeding of elephant-shrews (Macroscelididae). *Lab. Anim.* **6**, 213-224 (1972).
106. Stuart, C. & Stuart, T. *Field Guide to Mammals of Southern Africa* (Struik Publishers, 2001).
107. Watson, C., Provis, J. & Herculano-Houzel, S. What determines motor neuron number? Slow scaling of facial motor neuron numbers with body mass in marsupials and primates. *Anat. Rec.* **295**, 1683-1691 (2012).
108. Smith, K. K. Craniofacial development in marsupial mammals: developmental origins of evolutionary change. *Dev. Dyn.* **235**, 1181-1193 (2006).
109. Gemmell, R. & Selwood, L. Structural development in the newborn marsupial, the stripe-faced dunnart, *Sminthopsis macroura*. *Cells Tissues Organs* **149**, 1-12 (1994).
110. Weisbecker, V. & Goswami, A. Brain size, life history, and metabolism at the marsupial/placental dichotomy. *Proc. Nat. Acad. Sci. U.S.A.* **107**, 16216-16221 (2010).

111. Grant, T. & Temple-Smith, P. Field biology of the platypus (*Ornithorhynchus anatinus*): historical and current perspectives. *Philos. Trans. R. Soc. Lond., B, Biol. Sci.* **353**, 1081-1091 (1998).
112. Rismiller, P. D. & McKelvey, M. W. Body mass, age and sexual maturity in short-beaked echidnas, *Tachyglossus aculeatus*. *Comp. Biochem. Physiol., Part A Mol. Integr. Physiol.* **136**, 851-865 (2003).
113. Rismiller, P. D. & McKelvey, M. W. Frequency of breeding and recruitment in the short-beaked echidna, *Tachyglossus aculeatus*. *J. Mammal.* **81**, 1-17 (2000).
114. Corfield, J. R., Wild, J. M., Hauber, M. E., Parsons, S. & Kubke, M. F. Evolution of brain size in the Palaeognath lineage, with an emphasis on New Zealand ratites. *Brain Behav. Evol.* **71**, 87-99 (2008).
115. Blakers, M., Davies, S., Reilly, P. N. & Union, R. A. O. *The atlas of Australian birds* (Melbourne University Press, 1984).
116. Mlikovsky, J. Brain size in birds: 1. Tinamiformes through Ciconiiformes. *Vest. Cs. Spolec. Zool.* **53**, 33-47 (1989).
117. Uni, Z., Ferket, P., Tako, E. & Kedar, O. In ovo feeding improves energy status of late-term chicken embryos. *Poul. Sci.* **84**, 764-770 (2005).
118. Flint, J. & Mott, R. Finding the molecular basis of quantitative traits: successes and pitfalls. *Nat. Rev. Genet.* **2**, 437-445 (2001).
119. Bashir, M. & Javed, M. T. Effects of ethanol on brain and pancreas weights, serum sodium and potassium, and haematological parameters in quail (*Coturnix coturnix japonica*). *Avian Pathol.* **34**, 96-100 (2005).
120. Tserveni-Gousi, A. S. Relationship between parental age, egg weight and hatching weight of Japanese quail. *Br. Poult. Sci.* **28**, 749-752 (1987).
121. Woodard, A. E., Abplanalp, H. & Wilson, W. O. *Japanese Quail Husbandry in the Laboratory (Coturnix coturnix japonica)* (Department of Avian Sciences, University of California, Davis, 1973).
122. Jensen, J. K. Sand lizard (*Lacerta agilis* L.) with a second clutch in Denmark. *Amphibia-Reptilia* **2**, 267 (1981).
123. Amat, F., Llorente, G. & Carretero, M. Reproductive cycle of the sand lizard (*Lacerta agilis*) in its southwestern range. *Amphibia-Reptilia* **21**, 463-476 (2000).
124. Ekner, A. *et al.* Densities and morphology of two co-existing lizard species (*Lacerta agilis* and *Zootoca vivipara*) in extensively used farmland in Poland. *Folia Biol.* **56**, 3-4 (2008).
125. Vitt, L. J. & Lacher, T. E. Behavior, habitat, diet, and reproduction of the iguanid lizard *Polychrus acutirostris* in the caatinga of northeastern Brazil. *Herpetologica* **37**, 53-63 (1981).
126. Ferguson, M. W. J. in *Biology of the Reptilia* (eds Gans, G., Billett, F., & Maderson, P. F. A.) 329-491 (Academic Press, 1985).
127. Ross, J. P. *Continuing Studies of Mortality of Alligators on Central Florida Lakes: Pathology and Nutrition: Final Report to St. Johns River Water Management District, Contract #SE122AA* (St. Johns River Water Management District, 2002).
128. Branch, W. R. & Patterson, R. W. Notes on the development of embryos of the African rock python, *Python sebae* (Serpentes: Boidae). *J. Herpetol.* **9**, 243-248 (1975).
129. Branch, B. & Erasmus, H. Captive breeding of pythons in south africa, including details of an interspecific hybrid (*Python sebae natalensis* x *Python molurus bivittatus*). *Afr. J. Herpetol.* **30**, 1-10 (1984).
130. Ott, B. D. & Secor, S. M. Adaptive regulation of digestive performance in the genus *Python*. *J. Exp. Biol.* **210**, 340-356 (2007).
131. Boback, S. M., Dichter, E. K. & Mistry, H. L. A developmental staging series for the African house snake, *Boaedon (Lamprophis) fuliginosus*. *Zoology* **115**, 38-46 (2012).
132. Mills, M. S. *Ecology and life history of the brown water snake (Nerodia taxispilota)* Ph.D. thesis. University of Georgia (2002).
133. Yntema, C. Procurement and use of turtle embryos for experimental procedures. *Anat. Rec.* **149**, 577-585 (1964).
134. Burghardt, G. M. & Hess, E. H. Food imprinting in the snapping turtle, *Chelydra serpentina*. *Science* **151**, 108-109 (1965).
